# Supplementary material for: Managing food allergy: GA2LEN guideline 2022
Source: PubMed Central journal article supplement — World Allergy Organ J. 2022 Sep 7;15(9):100687. doi: 10.1016/j.waojou.2022.100687 (PMC9467869; doi:10.1016/j.waojou.2022.100687), 2022-09-07
Supplement: mmc1.pdf [file mmc1.pdf]

# Managing Food Allergy: Ga2len Guideline 2022

## AUTHORS

Antonella Muraro\*, Debra de Silva, Susanne Halken\*, Margitta Worm\*, Ekaterina Khaleva, Stefania Arasi, Audrey DunnGalvin, Bright I. Nwaru, Nicolette W. De Jong, Pablo Rodríguez Del Río, Paul J. Turner, Pete Smith, Philippe Begin, Elizabeth Angier, Hasan Arshad, Barbara Ballmer-Weber, Kirsten Beyer, Carsten Bindslev-Jensen, Antonella Cianferoni, Céline Demoulin, Antoine Deschildre, Motohiro Ebisawa, Maria Montserrat Fernandez-Rivas, Alessandro Fiocchi, Bertine Flokstra, Jennifer Gerds, Josefine Gradman, Kate Grimshaw, Carla Jones, Susanne Lau, Richard Loh, Montserrat Alvaro Lozano, Mika Makela, Mary Jane Marchisotto, Rosan Meyer, Clare Mills, Caroline Nilsson, Anna Nowak-Wegrzyn, Ulugbek Nurmatov, Giovanni Pajno, Marcia Podestà, Lars K. Poulsen, Hugh A. Sampson, Angel Sanchez, Sabine Schnadt, Hania Szajewska, Ronald Van Ree, Carina Venter, Berber Vlieg-Boerstra, Amena Warner, Gary Wong, Robert Wood, Torsten Zuberbier, Graham Roberts\* on behalf of GA<sup>2</sup>LEN Food Allergy Guideline Group

\*Equal contribution as guideline chairs

## CORRESPONDING AUTHORS

Antonella Muraro (muraro@centroallergiealimentari.eu) and Graham Roberts: (g.c.roberts@soton.ac.uk)

## CONTENTS

### Online supplement 1: methods used to compile evidence

|                                                             |   |
|-------------------------------------------------------------|---|
| Protocols                                                   | 3 |
| Study selection                                             | 3 |
| Data extraction                                             | 4 |
| Risk of bias in individual studies                          | 4 |
| Synthesis of results                                        | 4 |
| Table S1.1: Scope of the reviews                            | 5 |
| Search strategies                                           | 6 |
| Table S1.2: Location of the GREE II points in the guideline | 9 |

### Online supplement 2: dietary interventions

|                                                                     |    |
|---------------------------------------------------------------------|----|
| Table S2.1: Justification for elimination diet recommendations      | 10 |
| Table S2.2: Justification for infant formula recommendations        | 11 |
| Table S2.3: Justification for supplements recommendation            | 16 |
| Table S2.4: Number of studies screened, included and excluded       | 18 |
| Table S2.5: Details of studies included                             | 19 |
| Table S2.6: Summary of risk of bias                                 | 25 |
| Table S2.7: Reasons why studies screened as full text were excluded | 27 |

### Online supplement 3: allergen immunotherapy

|                                                                                    |    |
|------------------------------------------------------------------------------------|----|
| Table S3.1: Justification of recommendation for peanut oral immunotherapy          | 29 |
| Table S3.2: Justification for recommendation for peanut epicutaneous immunotherapy | 31 |
| Table S3.3: Justification for recommendation for egg and milk oral immunotherapy   | 32 |
| Table S3.4: Justification for not recommending for or against other immunotherapy  | 34 |
| Table S3.5: Number of studies screened, included and excluded                      | 36 |
| Table S3.6: Details of studies included                                            | 37 |
| Table S3.7: Summary of risk of bias                                                | 39 |
| Table S3.8: Reasons why studies screened as full text were excluded                | 41 |

### Online supplement 4: biological therapies

|                                                         |    |
|---------------------------------------------------------|----|
| Table S4.1: Recommendation justification for omalizumab | 43 |
| Table S4.2: Recommendation justification for etakimab   | 44 |

|                                                                                  |    |
|----------------------------------------------------------------------------------|----|
| Table S4.3: Recommendation justification for other biological monotherapy        | 45 |
| Table S4.4: Number of studies screened, included and excluded                    | 45 |
| Table S4.5: Details of studies included                                          | 46 |
| Table S4.6: Summary of risk of bias                                              | 47 |
| Table S4.7: Reasons why studies screened as full text were excluded              | 47 |
| <b>Online supplement 5: educating individuals with food allergy and families</b> |    |
| Table S5.1: Justification for best practice statement about education            | 48 |
| Table S5.2: Number of studies screened, included and excluded                    | 49 |
| Table S5.3: Details of studies included                                          | 50 |
| Table S5.4: Summary of risk of bias                                              | 51 |
| Table S5.5: Reasons why studies screened as full text were excluded              | 51 |
| <b>Online supplement 6: risk identification and management</b>                   |    |
| Table S6.1: Justification for best practice statement about adolescents          | 52 |
| Table S6.2: Justification for best practice statement about asthma management    | 53 |
| Table S6.3: Justification for best practice statement about prediction           | 54 |
| Table S6.4: Number of studies screened, included and excluded                    | 56 |
| Table S6.5: Details of studies included                                          | 57 |
| Table S6.6: Summary of risk of bias                                              | 62 |
| Table S6.7: Reasons why studies screened as full text were excluded              | 65 |
| <b>References</b>                                                                | 69 |

## Online supplement 1: methods used to compile evidence

This supplement sets out the methods we used to identify and compile evidence to inform our recommendations.

We undertook two systematic reviews and three rapid reviews using a systematic search strategy.

### Protocols

Clinicians, patient representatives and methodologists worked together to agree and prioritize key questions of interest. These are listed in Box 2 in the main text. For each review question we agreed a protocol, setting out the population of interest, intervention, comparator, outcomes and search strategy.

Table S1.1 summarizes key points. The full protocols are available on request from the authors.

We undertook systematic reviews about allergen immunotherapy and biological therapies. We undertook rapid reviews about dietary interventions, risk identification and education. We used the same systematic search approach, but the rapid reviews used a simplified risk of bias assessment and the certainty of evidence was judged largely on the risk of bias in those reviews.

### Study selection

An information specialist searched 6 databases for studies published between the beginning of the database and 30 April 2021 (CINAHL, Cochrane Library, EMBASE, ISI Web of Science, MEDLINE, Scopus). For the education topic, PsychInfo and ERIC were also searched. The search was updated to 30 September 2021 for biological therapies. There were no language or geographic restrictions.

The taskforce also reviewed the reference lists of reviews, guidelines and identified studies and contacted experts in the field for additional research.

Two methodologists independently screened the titles, abstracts and full text of potentially relevant studies. Shortlisted studies were rescreened by clinicians, allied health professionals and patient representatives (all authors) to reach consensus about what to include.

The Task Force divided into five working groups, with one group taking responsibility for each of the key clinical questions that we prioritized. Each working group rescreened the full text of potentially relevant papers and searched for others that met the inclusion criteria.

The inclusion criteria are listed in Table S1.1.

All reviews excluded studies of people with lactose intolerance or coeliac disease, all other reactions to food that have sometimes been referred to as 'food intolerance' and studies about other potential manifestations of food allergy such as eczema where there was not an explicit diagnosis of food allergy or a reported history of food allergy. Non-systematic reviews, discussion papers, non-research letters and editorials, case studies, observational studies (except for risk identification), animal studies, abstracts, studies not available in full form and unpublished material were excluded.

Where repeated reports of the same study were identified, we included and cited the most up-to-date or detailed unless there was a good clinical reason to include earlier write ups of the studies.

### Data extraction

For all reviews, pairs of Task Force members extracted study characteristics and outcomes independently using a bespoke form. We compared the results to reach consensus. A senior clinician acted as an arbitrator if needed, but there was consensus.

The data extracted included citation details, country, population characteristics / subgroups, sample size, intervention, food allergens, efficacy and safety outcomes and outcome measurement approach, including time period.

### **Risk of bias in individual studies**

Pairs of Task Force members and methodologists independently assessed the risk of bias in individual studies using the Cochrane Risk of Bias tool 2 (ROB2) for randomized controlled trials and ROBINS I for non-randomized studies. Arbitration was available if needed from a senior clinician but there was agreement in the risk of bias assessments.

In our rapid reviews we used all the category headings for ROB2 and ROBINS I, but the assessments were not independently agreed with methodologists.

Randomized controlled trials were assessed focusing on bias due to the (i) randomization process; (ii) assignment / deviations from intended group; (iii) missing data; (iv) outcome measurement; and (v) reporting. Each factor was rated as at low, moderate or high risk of bias, then an overall rating was assigned.

Non-randomized studies were assessed focusing on bias due to the (i) confounding (non-comparable groups); (ii) participant selection; (iii) how interventions were defined; (iv) changes from the intended intervention; (v) missing data; (vi) outcome measurement; and (vii) reporting. Each factor was rated as at low, moderate or high risk of bias, then an overall rating was assigned.

### **Synthesis of results**

Table S1.2 gives the page numbers for where components of the AGREE II framework are summarized. We used the Grading of Recommendations, Assessment, Development and Evaluation (GRADE) approach to synthesize data about each outcome.

In the systematic review about immunotherapy, we pooled intention-to-treat data using random effects Mantel-Haenszel meta-analysis (Revman 5.4) because the studies included different populations, regimes and time periods and to avoid overweighting large but imprecise studies. We divided studies based on the food allergy and immunotherapy administration route. We undertook subgroup analysis based on risk of bias, age, allergy severity, comparator and threshold tolerated. In sensitivity analysis, we used a continuity correction (adding 0.05 to numerators and denominators) where there were no events in each study arm for severe or life-threatening events, anaphylaxis and adrenaline use.

In this system review we also used funnel plots to help assess publication bias. We quantified the heterogeneity of studies using the I<sup>2</sup> statistic, with values less than 25% indicating low heterogeneity. We weighed up all of this information when creating evidence profiles and summary of findings tables.

In all of our other reviews, we synthesized the findings narratively because the data were insufficient or too heterogeneous to undertake meta-analysis.

All Task Force members developed conclusions by consensus, recognizing any potential conflicts of interest, which were declared in advance. We used standardized GRADE statements to summarize the conclusions. We used tables to summarize key findings and the other factors that we considered when creating recommendations. These are presented in Supplements 2-6.

**TABLE S1.1: SCOPE OF THE REVIEWS**

| <b>Characteristic</b> | <b>Education</b>                                                                                                                                          | <b>Dietary interventions</b>                                                                                                                                          | <b>Immunotherapy</b>                                                                                                              | <b>Biological therapies</b>                                                                                                       | <b>Risk identification</b>                                                                                                                                                                                                                                                                                                                              |
|-----------------------|-----------------------------------------------------------------------------------------------------------------------------------------------------------|-----------------------------------------------------------------------------------------------------------------------------------------------------------------------|-----------------------------------------------------------------------------------------------------------------------------------|-----------------------------------------------------------------------------------------------------------------------------------|---------------------------------------------------------------------------------------------------------------------------------------------------------------------------------------------------------------------------------------------------------------------------------------------------------------------------------------------------------|
| Review type           | Rapid                                                                                                                                                     | Rapid                                                                                                                                                                 | Systematic                                                                                                                        | Systematic                                                                                                                        | Rapid                                                                                                                                                                                                                                                                                                                                                   |
| Population            | People reported with food allergy.                                                                                                                        | People diagnosed with food allergy                                                                                                                                    | People with IgE-mediated food allergy confirmed with food challenge                                                               | People with IgE-mediated food allergy confirmed with food challenge                                                               | People with IgE-mediated food allergy or FPIES, confirmed with food challenge                                                                                                                                                                                                                                                                           |
| Intervention          | Education about managing food allergy for affected individuals and their family members                                                                   | Any dietary interventions including elimination diets, infant formulas and supplements                                                                                | Allergen immunotherapy alone or with a biological therapy; any route of administration                                            | Biological therapy alone                                                                                                          | Any predictor associated with more severe outcomes due to acute reactions: hospitalization, intensive care admission, death                                                                                                                                                                                                                             |
| Comparator            | No intervention, another educational intervention or 'routine management'                                                                                 | Any comparator, placebo, no active intervention or 'routine management'                                                                                               | Placebo or no active intervention or 'routine management' as long as routine management did not involve an active treatment agent | Placebo or no active intervention or 'routine management' as long as routine management did not involve an active treatment agent | Not applicable                                                                                                                                                                                                                                                                                                                                          |
| Outcomes of interest  | Quality of life<br>Effectiveness (improved knowledge or confidence)<br>Adverse events (including anxiety)<br>Cost-effectiveness                           | Quality of life<br>Effectiveness (fewer allergic reactions, tolerance)<br>Adverse events (including growth, reactions)<br>Tolerance development<br>Cost-effectiveness | Quality of life<br>Effectiveness (desensitization, sustained unresponsiveness)<br>Adverse events<br>Cost-effectiveness            | Quality of life<br>Effectiveness (tolerance)<br>Adverse events<br>Cost-effectiveness                                              | Morbidity or mortality                                                                                                                                                                                                                                                                                                                                  |
| Study types           | Randomized controlled trials or prospective non-randomized studies with a simultaneous comparison group published in full as articles or research letters | Randomized controlled trials or prospective non-randomized studies with a simultaneous comparison group published in full as articles or research letters             | Randomized controlled trials published in full as articles or research letters                                                    | Randomized controlled trials or controlled clinical trials published in full as articles or research letters                      | Systematic reviews; randomized controlled trials or controlled clinical trials; cohort studies with >50 blinded food challenges or >100 open food challenges; case-control studies with >100 cases; case series with >500 cases; for fatal or near-fatal outcomes, case series with n≥15. All reports published in full as articles or research letters |
| Databases searched    | CINAHL, Cochrane Library, Embase, ERIC, ISI Web of Science, MEDLINE, PsychInfo, Scopus                                                                    | CINAHL, Cochrane Library, Embase, ISI Web of Science, MEDLINE, Scopus                                                                                                 | CINAHL, Cochrane Library, Embase, ISI Web of Science, MEDLINE, Scopus                                                             | CINAHL, Cochrane Library, Embase, ISI Web of Science, MEDLINE, Scopus                                                             | CINAHL, Cochrane Library, Embase, ISI Web of Science, MEDLINE, Scopus                                                                                                                                                                                                                                                                                   |

## SEARCH STRATEGIES

### Dietary and education

#### Question

Which educational interventions and dietary interventions for people with food allergy are effective and cost-effective?

#### Inclusion criteria

- Study design: systematic reviews (to help identify other relevant studies only), randomised controlled trials, or controlled clinical trials (simultaneous control group, but not necessarily randomly assigned, includes quasi randomised, not before and after studies). Published as full article or research letter, not abstract
- Population: people with IgE-mediated or non-IgE-mediated food allergy. No requirement to confirm at outset by food challenge
- Intervention: any educational intervention for people with food allergy (not professionals); any dietary intervention for people with food allergy
- Comparator: placebo, routine management or other intervention
- Outcomes: efficacy, quality of life, adverse effects from intervention, cost-effectiveness
- Timeframe: Published from the beginning of databases (1946) to 30 April 2021

#### Search strategy for CINAHL, Cochrane Library, ISI Web of Science

(Food hypersensitivity or food allergy or milk allergy or egg allergy or nut allergy or peanut allergy or tree nut allergy or hazelnut allergy or legumes allergy or wheat allergy or soy allergy or fish allergy or seafood allergy or shellfish allergy or kiwi allergy or apple allergy or peach allergy or additives hypersensitivity or additives allergy or IgE)

AND

(educat\* or info\* or train\* or course or simulation or leaflet or book\* or online or peer or aid or visual or graphic or counsel\* or psycho-social or social or diet\* or formula\* or probiotic\* or avoid\* or eliminat\* or hydroly\* or food label or psychological\*)

AND

(Intervention stud\* or experimental stud\* or trial or clinical trial\* or randomi\* controlled trial or random allocation or single blind method or double blind method or triple blind method or random\* or quasi\* or controlled clinical trial or economic evaluation\* or cost effective\* analys\* or cost analys\* or cost benefit analys\* or cost utility analys\* or cost consequence analys\* or finances or quality of life or efficacy or desensiti\* or sustained unresponsiveness)

#### Search strategy for MEDLINE and EMBASE

1. exp Food Hypersensitivity/
2. exp Milk Hypersensitivity/
3. exp Egg Hypersensitivity/
4. exp Peanut Hypersensitivity/
5. exp Tree nut Hypersensitivity/
6. exp Nut Hypersensitivity/
7. ((food or milk or egg or peanut or tree nut or hazelnut or brazil nut or walnut or chestnut or pistachio or almond or legumes or wheat or rice or soy or fish or seafood or shellfish or shrimp or lobster or crab or crawfish or kiwi or apple or peach or apricot or cherry or pear or plum or tomato

or green pea or potato or carrot or parsley or celery or additives or IgE) adj3 (allerg\* or hypersensitivit\*)).mp.

8. or/1-7

9. (educat\* or info\* or train\* or course or simulation or leaflet or book\* or online or peer or aid or visual or graphic or counsel\* or psycho-social or social or diet\* or formula\* or probiotic\* or avoid\* or eliminat\* or hydroly\* or food label or psychological\*)

10. 8 and 9

11. exp Intervention Studies/

12. Intervention Studies.mp.

13. Experimental stud\*.mp.

14. exp Clinical Trial/

15. Trial.mp.

16. Systematic review.mp.

17. Randomized Controlled Trial.mp.

18. exp Placebos/

19. Placebos.mp.

20. exp Random Allocation/

21. Random Allocation.mp.

22. exp Double-Blind Method/

23. Double-Blind Method.mp.

24. Double-Blind design.mp.

25. exp Single-Blind Method/

26. Single-Blind Method.mp.

27. Single-Blind design.mp.

28. Random\*.mp.

29. Quasi random\*.mp.

30. Controlled clinical trial.mp.

31. Comparison.mp

32.. Cost.mp.

33. Exp Health care Costs/

34. Economic evaluation\*.mp.

35. ((cost effective\* adj1 analys\*) or cost minimization analys\* or cost benefit analys\* or cost utility analys\* or cost consequence analys\* or finances).mp.

36. Quality of life.mp.

37. Efficacy.mp.

38. Effective\*.mp.

39. Or/11-38

40. 10 and 39

## **Risk**

### Inclusion criteria

Population: People with IgE-mediated food allergy or FPIES, confirmed either by food challenge or clinician-assessed history of severe reaction (e.g. anaphylaxis).

Study focus: Any predictor associated with more severe outcomes due to acute reactions: hospitalization, intensive care admission, death.

Outcomes: severe anaphylaxis; morbidity or mortality

See Table S1.1 for details of study types.

There were no language restrictions.

## Search strategy

MEDLINE, EMBASE and the Cochrane Register of Controlled Trials were searched including all primary records from 1 January 2010 until 31 August 2021. Search strategy:

1. sever\*.mp. [mp=ti, ab, hw, tn, ot, dm, mf, dv, kw, fx, dq, nm, kf, ox, px, rx, ui, sy] AND (food or peanut or milk or egg or wheat or LTP or nut or fish or seafood or crustac\*).mp. [mp=ti, ab, hw, tn, ot, dm, mf, dv, kw, fx, dq, nm, kf, ox, px, rx, ui, sy] AND allergy.mp. [mp=ti, ab, hw, tn, ot, dm, mf, dv, kw, fx, dq, nm, kf, ox, px, rx, ui, sy]
2. limit 1 to human
3. (systematic or review or randomised or randomized or control\* or placebo or cohort or observational or registry).mp. [mp=ti, ab, hw, tn, ot, dm, mf, dv, kw, fx, dq, nm, kf, ox, px, rx, ui, sy]
4. 2 and 3

The reference lists of included studies and review articles were also reviewed to identify other relevant studies.



**TABLE S1.2: LOCATION OF AGREE II POINTS IN THE GUIDELINE**

| Area                                                                                                          | Location in guideline                                                        |
|---------------------------------------------------------------------------------------------------------------|------------------------------------------------------------------------------|
| <b>DOMAIN 1. SCOPE AND PURPOSE</b>                                                                            |                                                                              |
| 1. The overall objective(s) of the guideline is (are) specifically described.                                 | Introduction - final paragraph                                               |
| 2. The health question(s) covered by the guideline is (are) specifically described.                           | Box 2                                                                        |
| 3. The population (patients, public, etc.) to whom the guideline is meant to apply is specifically described. | Introduction - final paragraph                                               |
| <b>DOMAIN 2. STAKEHOLDER INVOLVEMENT</b>                                                                      |                                                                              |
| 4. The guideline development group includes individuals from all relevant professional groups.                | Methods - Approach to developing guideline                                   |
| 5. The views and preferences of the target population (patients, public, etc.) have been sought.              | Methods - Approach to developing guideline                                   |
| 6. The target users of the guideline are clearly defined.                                                     | Introduction - final paragraph                                               |
| <b>DOMAIN 3. RIGOUR OF DEVELOPMENT</b>                                                                        |                                                                              |
| 7. Systematic methods were used to search for evidence.                                                       | Methods - Review of the evidence                                             |
| 8. The criteria for selecting the evidence are clearly described.                                             | Methods - Review of the evidence; Supplement 1 – Study selection; Table S1.1 |
| 9. The strengths and limitations of the body of evidence are clearly described.                               | Supplement 1 - Risk of bias in individual studies                            |
| 10. The methods for formulating the recommendations are clearly described.                                    | Methods - Review of the evidence; Supplement 1 - Synthesis of results        |
| 11. The health benefits, side effects, and risks have been considered in formulating the recommendations.     | Methods - Review of the evidence and S2 to 6 tables of benefits and risks    |
| 12. There is an explicit link between the recommendations and the supporting evidence.                        | Guideline recommendations; Tables S2.1, S3.1, S4.1, S5.1                     |
| 13. The guideline has been externally reviewed by experts prior to its publication.                           | Methods - Peer review and public comment                                     |
| 14. A procedure for updating the guideline is provided.                                                       | Methods - Updating the guidelines                                            |
| <b>DOMAIN 4. CLARITY OF PRESENTATION</b>                                                                      |                                                                              |
| 15. The recommendations are specific and unambiguous.                                                         | Table 2                                                                      |
| 16. The different options for management of the condition or health issue are clearly presented.              | Guideline recommendations                                                    |
| 17. Key recommendations are easily identifiable.                                                              | Table 2                                                                      |
| <b>DOMAIN 5. APPLICABILITY</b>                                                                                |                                                                              |
| 18. The guideline describes facilitators and barriers to its application.                                     | Table 4                                                                      |
| 19. The guideline provides advice and/or tools on how the recommendations can be put into practice.           | Table 4                                                                      |
| 20. The potential resource implications of applying the recommendations have been considered.                 | Table 4                                                                      |
| 21. The guideline presents monitoring and/or auditing criteria.                                               | Table 4                                                                      |
| <b>DOMAIN 6. EDITORIAL INDEPENDENCE</b>                                                                       |                                                                              |
| 22. The views of the funding body have not influenced the content of the guideline.                           | Methods - Editorial independence and managing conflicts                      |
| 23. Competing interests of guideline development group members have been recorded and addressed.              | Methods - Editorial independence and managing conflicts                      |

## Online supplement 2: dietary interventions

**TABLE S2.1: JUSTIFICATION FOR ELIMINATION DIET RECOMMENDATIONS**

The GA<sup>2</sup>LEN Task Force suggests that people with a documented food allergy avoid the offending food unless their individual circumstances and risks allow for some consumption, as advised by their healthcare professional. We suggest that most breastfeeding mothers whose infants have a food allergy do not need to avoid the offending food themselves, though in rare cases this might be considered.

| Intervention                                                              | Evidence of effectiveness                                                                                                                                                                                                                                                                                                                                                                                                                                                                                                                                                                                                                                                               | Benefits versus harms                                                                                                                                                                                                                                                                                                                                                                                                                                                                                                                                                                                                                                | Patient/care giver values                                                                                                                                                                                                                                                                                                                                                                                                                                                               | Feasibility and cost issues                                                                                                                                                                                                                                                                                                                                                                                                                                                                                                                                                                                                                                                                                                                                                                                                                                                                                                                                                        |
|---------------------------------------------------------------------------|-----------------------------------------------------------------------------------------------------------------------------------------------------------------------------------------------------------------------------------------------------------------------------------------------------------------------------------------------------------------------------------------------------------------------------------------------------------------------------------------------------------------------------------------------------------------------------------------------------------------------------------------------------------------------------------------|------------------------------------------------------------------------------------------------------------------------------------------------------------------------------------------------------------------------------------------------------------------------------------------------------------------------------------------------------------------------------------------------------------------------------------------------------------------------------------------------------------------------------------------------------------------------------------------------------------------------------------------------------|-----------------------------------------------------------------------------------------------------------------------------------------------------------------------------------------------------------------------------------------------------------------------------------------------------------------------------------------------------------------------------------------------------------------------------------------------------------------------------------------|------------------------------------------------------------------------------------------------------------------------------------------------------------------------------------------------------------------------------------------------------------------------------------------------------------------------------------------------------------------------------------------------------------------------------------------------------------------------------------------------------------------------------------------------------------------------------------------------------------------------------------------------------------------------------------------------------------------------------------------------------------------------------------------------------------------------------------------------------------------------------------------------------------------------------------------------------------------------------------|
| Elimination diet for children and adults with any food allergy            | <p>Avoiding the offending food likely reduces reactions and symptoms, but the certainty of evidence is low due to few studies directly examining elimination diets. This means we cannot make a strong recommendation in favor of elimination diets. Most of the available evidence is in children with milk or egg allergy.</p> <p>2 trials<sup>1,2</sup> (n = 296) and 2 non-randomized comparisons<sup>3,4</sup> (n = 93) found that eliminating hen's egg or cow's milk reduced reactions and/or improved symptoms in children. These studies and others about immunotherapy and infant formula focused on other interventions and used elimination diets as the control group.</p> | <p>Elimination diets are commonly recommended. The benefits, such as avoiding anaphylaxis and other symptoms from accidental exposure,<sup>5,6</sup> outweigh potential risks to nutrition and growth as long as people exclude only the offending food and do not have an unnecessarily strict diet.</p> <p>We make a conditional recommendation in favor of eliminating the allergen in recognition of the importance of avoiding severe reactions, but also the need to take into account people's individual reaction thresholds and risk of severe reactions and the need to maintain appropriate nutrition and unnecessarily strict diets.</p> | <p>Based on feedback from people with food allergy and their care givers and expert experience, people generally accept the need to avoid offending foods.</p> <p>However, it can be difficult to follow an elimination diet daily and this can impact on anxiety and social activities. It is therefore important to take an individualized approach when considering the extent of avoidance. This is why we do not make a strong recommendation in favor of universal avoidance.</p> | <p>Based on feedback from people with food allergy and care givers and expert experience, it is feasible to adhere to an avoidance diet if</p> <ol style="list-style-type: none"> <li>food allergy is formally diagnosed</li> <li>there is a thorough allergy diet history</li> <li>people with food allergy receive support from appropriate professionals such as a dietitian</li> </ol> <p>It can be costly to use substitute foods such as hypoallergenic milk formulas or gluten free alternatives. Reimbursement strategies differ by country. Therefore, it is important to focus on avoiding only the offending food.</p> <p>Heating some foods such as cow's milk and hen's egg may reduce the allergenicity and allow some people to consume products.<sup>7,8</sup> Young children with allergies to foods such as cow's milk and hen's egg may develop tolerance over time so diagnosis should be checked regularly to avoid unnecessarily long elimination diets.</p> |
| Elimination diet in breastfeeding mothers whose infant has a food allergy | <p>We found no eligible studies about the effectiveness of breastfeeding mothers avoiding the offending food if their infants had a food allergy. Our guidance on maternal dietary avoidance is therefore based on expert opinion and experience.</p>                                                                                                                                                                                                                                                                                                                                                                                                                                   | <p>Breast-feeding is the best source of nutrition for infants. Clinical experience suggests that benefits of maternal avoidance do not outweigh potential harms such as reduced nutrition for the mother which can negatively impact on breastfeeding.<sup>9</sup></p>                                                                                                                                                                                                                                                                                                                                                                               | <p>Based on feedback from care givers and expert experience, it can be difficult for mothers to follow an elimination diet and this can impact on anxiety and social activities.</p>                                                                                                                                                                                                                                                                                                    | <p>There is a fiscal burden with elimination diets. Feasibility issues may also lead mothers to consider reducing breastfeeding, which may in turn lead to increased costs for breastmilk substitutes. Very few infants react to the small amounts of food proteins in breastmilk.<sup>10-12</sup> In rare cases where a reaction is suspected while exclusively breastfed, the mother could try avoiding the offending food, with advice about maintaining nutrition for breastfeeding.</p>                                                                                                                                                                                                                                                                                                                                                                                                                                                                                       |

**TABLE S2.2: JUSTIFICATION FOR INFANT FORMULA RECOMMENDATIONS**

The GA<sup>2</sup>LEN Task Force suggests that most infants (aged 0-1 years) diagnosed with cow’s milk allergy who need a breastmilk alternative use a documented hypoallergenic extensively hydrolyzed cow’s milk formula, or an amino-acid based formula if better tolerated or more appropriate. We suggest against using partially hydrolyzed cow’s milk formula, mammalian milks and, also for infants under 6 months, against soy-based formula.

The GA<sup>2</sup>LEN Task Force makes no recommendation for or against hydrolyzed plant-based formulas including rice hydrolysates that have been evaluated so far for managing food allergy in infancy.

| Intervention                                                                           | Evidence of effectiveness                                                                                                                                                                                                                                                                                                                                                                                                                                                                                                                                                                                                                                                                                                     | Benefits versus harms                                                                                                                                                                                                                                                                                                                                                                                                                                                                                                                                                                                                                                                                                                                                                                                                                                                                                                                     | Patient/care giver values                                                                                                                                                                                                                                                                                                                                                                                                                                                                                                                                                                                                                                                                                                                                                                                                                                                                                                                                                                                                         | Feasibility and cost issues                                                                                                                                                                                                                         |
|----------------------------------------------------------------------------------------|-------------------------------------------------------------------------------------------------------------------------------------------------------------------------------------------------------------------------------------------------------------------------------------------------------------------------------------------------------------------------------------------------------------------------------------------------------------------------------------------------------------------------------------------------------------------------------------------------------------------------------------------------------------------------------------------------------------------------------|-------------------------------------------------------------------------------------------------------------------------------------------------------------------------------------------------------------------------------------------------------------------------------------------------------------------------------------------------------------------------------------------------------------------------------------------------------------------------------------------------------------------------------------------------------------------------------------------------------------------------------------------------------------------------------------------------------------------------------------------------------------------------------------------------------------------------------------------------------------------------------------------------------------------------------------------|-----------------------------------------------------------------------------------------------------------------------------------------------------------------------------------------------------------------------------------------------------------------------------------------------------------------------------------------------------------------------------------------------------------------------------------------------------------------------------------------------------------------------------------------------------------------------------------------------------------------------------------------------------------------------------------------------------------------------------------------------------------------------------------------------------------------------------------------------------------------------------------------------------------------------------------------------------------------------------------------------------------------------------------|-----------------------------------------------------------------------------------------------------------------------------------------------------------------------------------------------------------------------------------------------------|
| Extensively hydrolyzed cow’s milk based infant formula documented to be hypoallergenic | <p>Extensively hydrolyzed cow’s milk formula may reduce symptoms and reactions for infants with cow’s milk allergy. There is moderate certainty about this evidence, but some of the evidence is indirect or limited.</p> <p>We identified 10 trials (n = 705)<sup>13-22</sup> and 2 non-randomized comparisons (n = 38),<sup>23,24</sup> measuring the impact on cow’s milk allergy symptoms. Extensively hydrolyzed cow’s milk formula reduced allergy symptoms, but the trials compared different formulas and various comparators. We cannot say that one type of extensively hydrolyzed cow’s milk formula is more effective than others. Some of these studies included other interventions such as pre/probiotics.</p> | <p>The benefits outweigh possible harms. Two additional studies were identified after we reviewed the evidence.<sup>25,26</sup> The trials did not identify any significant adverse effects.</p> <p>Different extensively hydrolysed cows’ milk formulas are not identical and are heterogenic in composition.<sup>27</sup> The AAP and EAACI criteria for a product to be designated hypoallergenic is tolerance in 90% of children with cow’s milk allergy.<sup>28,29</sup></p> <p>Extensively hydrolyzed formulas that are documented hypoallergenic are well tolerated and do not negatively affect nutrition or growth.<sup>30,31</sup></p> <p>The EU Commission and EFSA, FDA and AAP define hypoallergenic formulas as ‘food for special medical purposes’ and must fulfil the nutritional requirements of products classified as ‘infant formula’</p> <p>WHO warns that any supplement may reduce breastfeeding.<sup>32</sup></p> | <p>Breastfeeding is preferable, but when this is not possible the best alternative should be chosen based on a family’s individual circumstances and preferences.</p> <p>The taste of the extensively hydrolyzed cow’s milk based differs between brands. Two studies suggested that the palatability of whey based extensively hydrolysed formulas containing lactose may be more palatable.<sup>33,34</sup></p> <p>If a child does not accept hypoallergenic products, the following could be tried: (i) mix and titrate the formula with breastmilk (do not store in mixed format to prevent autodigestion); (ii) mix and titrate with current formula if symptoms are not severe on current infant formula; (iii) use (alcohol free) vanilla drops to flavor the formula; (iv) a ready to feed formula may be better tolerated than a powdered one; (v) as a last resort, a few drops of milk shake syrups can be used for a few days; (vi) offer the formula in a cup/beaker or sippy cup in children who can use these.</p> | <p>Breastfeeding is low cost. Breast milk substitutes vary in cost and between countries. The price of extensively hydrolyzed formula may be higher than regular cow’s milk based infant formula. Reimbursement differs in different countries.</p> |

| Intervention                                         | Evidence of effectiveness                                                                                                                                                                                                                                                                                                                                                                                                                                                                                                                                     | Benefits versus harms                                                                                                                                                                                                                                                                                                                                                                                                                                                                                                                     | Patient/care giver values                                                                                                                                                                                                                                                                                                                                                                                                                                                                                       | Feasibility and cost issues                                                                                                                                                                                                                                                                                                                                                                                                                                                                                                                                         |
|------------------------------------------------------|---------------------------------------------------------------------------------------------------------------------------------------------------------------------------------------------------------------------------------------------------------------------------------------------------------------------------------------------------------------------------------------------------------------------------------------------------------------------------------------------------------------------------------------------------------------|-------------------------------------------------------------------------------------------------------------------------------------------------------------------------------------------------------------------------------------------------------------------------------------------------------------------------------------------------------------------------------------------------------------------------------------------------------------------------------------------------------------------------------------------|-----------------------------------------------------------------------------------------------------------------------------------------------------------------------------------------------------------------------------------------------------------------------------------------------------------------------------------------------------------------------------------------------------------------------------------------------------------------------------------------------------------------|---------------------------------------------------------------------------------------------------------------------------------------------------------------------------------------------------------------------------------------------------------------------------------------------------------------------------------------------------------------------------------------------------------------------------------------------------------------------------------------------------------------------------------------------------------------------|
| Amino acid-based infant formula                      | <p>Amino acid-based formula may reduce symptoms and reactions for infants with cow's milk allergy. There is moderate certainty about this evidence, but some of the evidence is indirect or limited.</p> <p>7 trials (n = 465)<sup>35-41</sup> and 1 non-randomized comparison (n = 18)<sup>42</sup> found a reduction in symptoms and allergic reactions from amino acid-based formula. The trials compared different formula with various comparators. Some were in children who did not tolerate extensively hydrolyzed formula and had poorer growth.</p> | <p>The benefits outweigh possible harms for selected children.</p> <p>Studies included in our rapid review found that amino acid-based formula supports normal growth<sup>43-46</sup> and may support longitudinal catch-up growth.<sup>47,48</sup></p> <p>WHO warns that any supplement may reduce breastfeeding.<sup>32</sup></p> <p>There are no data that suggest that amino acid-based formula delays the development of tolerance to cow's milk according to one study published after our review of the evidence.<sup>49</sup></p> | <p>Breastfeeding is preferable, but when this is not possible the best alternative should be chosen based on a family's individual circumstances and preferences.</p> <p>We do not have evidence about the values and preferences of people with food allergy and care givers related to amino acid-based formulas to inform this recommendation. The formulas were well tolerated in most studies, but there is some experience that the taste can be off putting for some, particularly in older infants.</p> | <p>Amino acid-based formula is usually more expensive than other formulas so we do not suggest this as the first option to try in most cases. Reimbursement varies between countries</p> <p>We suggest this option for infants whose symptoms are not fully resolved with extensively hydrolyzed formula, those infants who are not thriving on extensively hydrolysed formula,<sup>50</sup> those eliminating multiple foods, those with severe complex gastrointestinal food allergies, eosinophilic esophagitis or symptoms while exclusively breastfeeding.</p> |
| Partially hydrolyzed cow's milk based infant formula | <p>There is very low certainty evidence about the effectiveness of partially hydrolyzed formula for managing cow's milk allergy in infants.</p> <p>1 non-randomized comparison (n = 20) found no reduction in symptoms, and an increase in reactions to a partially hydrolyzed formula compared to extensively hydrolyzed formula.<sup>51</sup></p>                                                                                                                                                                                                           | <p>The possible harms, including risk of anaphylaxis, outweigh benefits.</p> <p>A number of publications that did not meet the eligibility criteria for our rapid review reported increased allergic reactions to partially hydrolyzed formula.<sup>52-55</sup></p>                                                                                                                                                                                                                                                                       | <p>Some infants may like the taste of partially hydrolyzed formula better than extensively hydrolyzed formula, but this is not a reason for recommending it as a way of managing food allergy. The product chosen has to be effective and safe.</p>                                                                                                                                                                                                                                                             | <p>The price may be higher than regular formula, but lower than extensively hydrolyzed formulas. Reimbursement varies between countries. Individual evaluation is important because some infants with a high threshold to cow's milk and mild symptoms may tolerate these products. However we do not suggest them for routine use, and these products should be used only after a careful individual assessment and advice from a healthcare professional.</p>                                                                                                     |

| Intervention                        | Evidence of effectiveness                                                                                                                                                                                                                                                                         | Benefits versus harms                                                                                                                                                                                                                                                                                                                                                                                                                                                                                                                                                                                                                         | Patient/care giver values                                                                                          | Feasibility and cost issues                                                                                                                                                                                                                                                                                                                                                                                                     |
|-------------------------------------|---------------------------------------------------------------------------------------------------------------------------------------------------------------------------------------------------------------------------------------------------------------------------------------------------|-----------------------------------------------------------------------------------------------------------------------------------------------------------------------------------------------------------------------------------------------------------------------------------------------------------------------------------------------------------------------------------------------------------------------------------------------------------------------------------------------------------------------------------------------------------------------------------------------------------------------------------------------|--------------------------------------------------------------------------------------------------------------------|---------------------------------------------------------------------------------------------------------------------------------------------------------------------------------------------------------------------------------------------------------------------------------------------------------------------------------------------------------------------------------------------------------------------------------|
| Mammalian milk such as goat and ass | <p>There is very low certainty of evidence about the effectiveness of milk from other mammals for managing cow's milk allergy in infants</p> <p>1 trial (n = 28) found no reduction in cow's milk allergy symptoms when using goats' milk whereas ass milk was better tolerated.<sup>56</sup></p> | <p>The possible harms, including risk of anaphylaxis, outweigh benefits. There is a high degree of cross reactivity with cow's milk proteins, especially for goats milk (89%), whereas it is a lower (4-17%) for heated donkeys' milk or camels' milk.<sup>57</sup></p> <p>Some observational or poor quality studies which did not meet our criteria for inclusion suggested that goat's milk may be associated with increased allergic reactions, including anaphylaxis, in a high proportion of children with cow's milk allergy.<sup>57-61</sup> The products may not be nutritionally sufficient. Other safe products are available.</p> | We do not have evidence about the values and preferences of patients and caregivers to inform this recommendation. | In some countries these milks may be inexpensive compared to some alternatives but they may also be difficult to access in other countries. We suggest that these should only be used to manage cow's milk allergy in special circumstances and with caution. Further, they should be used only after 1 year of age, from advice from a healthcare professional and under supervision of the nutrition and growth of the child. |

| Intervention                                                                                | Evidence of effectiveness                                                                                                                                                                                                                                                                                                                                                                                                                                                                                                                                                                                                                                                                                                                                                                                                                                                                                                                                                 | Benefits versus harms                                                                                                                                                                                                                                                                                                                                                                                                                                                                                                                                                                                                                                                                                                                                                                                                                                                                                                                                                                                                                                                   | Patient/care giver values                                                                                                                                                                                                                                                                                                                                                                                                                                                                                                                                                                                                      | Feasibility and cost issues                                                                                                                                                                                                                                                                                                                                                                                                                                                                                                                                                      |
|---------------------------------------------------------------------------------------------|---------------------------------------------------------------------------------------------------------------------------------------------------------------------------------------------------------------------------------------------------------------------------------------------------------------------------------------------------------------------------------------------------------------------------------------------------------------------------------------------------------------------------------------------------------------------------------------------------------------------------------------------------------------------------------------------------------------------------------------------------------------------------------------------------------------------------------------------------------------------------------------------------------------------------------------------------------------------------|-------------------------------------------------------------------------------------------------------------------------------------------------------------------------------------------------------------------------------------------------------------------------------------------------------------------------------------------------------------------------------------------------------------------------------------------------------------------------------------------------------------------------------------------------------------------------------------------------------------------------------------------------------------------------------------------------------------------------------------------------------------------------------------------------------------------------------------------------------------------------------------------------------------------------------------------------------------------------------------------------------------------------------------------------------------------------|--------------------------------------------------------------------------------------------------------------------------------------------------------------------------------------------------------------------------------------------------------------------------------------------------------------------------------------------------------------------------------------------------------------------------------------------------------------------------------------------------------------------------------------------------------------------------------------------------------------------------------|----------------------------------------------------------------------------------------------------------------------------------------------------------------------------------------------------------------------------------------------------------------------------------------------------------------------------------------------------------------------------------------------------------------------------------------------------------------------------------------------------------------------------------------------------------------------------------|
| <p>Plant based infant formulas such as soy formula or partially hydrolyzed rice formula</p> | <p>We cannot draw conclusions about plant based hydrolyzed infant formulas for managing cow's milk allergy in infants because we have low certainty in the evidence.</p> <p>3 trials (n = 350) found that soy-protein based infant formula reduced symptoms.<sup>62-64</sup> But 1 trial (n = 38)<sup>65</sup> and 3 non-randomized comparisons (n = 350) found no improvement in symptoms or tolerance with soy based infant formula compared to extensively hydrolyzed cow's milk<sup>66,67</sup> , or partially hydrolyzed rice formula.<sup>68</sup></p> <p>Another trial (n = 92) found that partially hydrolyzed rice formula was as effective and well tolerated as extensively hydrolyzed cow's milk formula.<sup>69</sup> 1 trial (n = 52) found that almond drink was as effective as extensively hydrolyzed cow's milk and soy formulas.<sup>70</sup></p> <p>We found no trials investigating the effect or safety of hydrolyzed soy-protein based formula</p> | <p>The possible harms outweigh benefits from some plant-based drinks/formulas. Plant based formulas have no nutritional advantage over cow's milk formulas. Position papers not eligible for our review report potential negative effects on growth and other adverse effects of plant-based drinks.<sup>71,72</sup></p> <p>Soy-protein based formulas contain high concentrations of phytate, aluminum and phytoestrogens (isoflavones) which might have detrimental effects in the first 6 months of life.<sup>72,73</sup> Soy also contains glucose which may affect a baby's teeth. One trial of soy-protein based formula included in our review found allergic reactions to the formula, especially in infants younger than 6 months. After 6 months this was rare.<sup>74,75</sup> Studies have generally not found reduced growth in cow's milk allergic infants fed soy-protein based formula or rice hydrolysate.<sup>76,77</sup> Other safe products are available.</p> <p>There are concerns about possible arsenic levels in rice drinks.<sup>78</sup></p> | <p>Families may wish to consider soy-protein based formula or rice based hydrolysates for infants who cannot have dairy-based products because of cultural, medical or religious reasons such as a vegan lifestyle, persistent lactose intolerance or galactosemia. In this case, the potential benefits and harms of soy and rice formulas/ hydrolysates should be discussed fully. For these families, infant soy based formulas could be considered, but preferably not until after 6 months of age; soy drinks are not appropriate. When breastmilk is not available a hydrolyzed rice formula can be used from birth.</p> | <p>Soy-protein based formulas and other plant based formulas are available in many countries, but are more expensive than breastfeeding and more expensive than cow's milk-based formula, though cheaper than extensively hydrolyzed cow's milk based and amino-acid infant formulas. Access to other plant-based infant formulas varies in different parts of the world.</p> <p>Other plant based drinks/formulas than soy- and rice based infant formulas, cannot replace breastfeeding or other infant formulas, but may be used as supplement after the age of one year.</p> |

| Intervention                                                                                            | Evidence of effectiveness                                                                                                                                                                                                                                                                                                                                                                                                                                                                                                        | Benefits versus harms                                                                                                                                                                                                                                                                                                                                                                                                                           | Patient/care giver values                                                                                         | Feasibility and cost issues                                                                                                                                          |
|---------------------------------------------------------------------------------------------------------|----------------------------------------------------------------------------------------------------------------------------------------------------------------------------------------------------------------------------------------------------------------------------------------------------------------------------------------------------------------------------------------------------------------------------------------------------------------------------------------------------------------------------------|-------------------------------------------------------------------------------------------------------------------------------------------------------------------------------------------------------------------------------------------------------------------------------------------------------------------------------------------------------------------------------------------------------------------------------------------------|-------------------------------------------------------------------------------------------------------------------|----------------------------------------------------------------------------------------------------------------------------------------------------------------------|
| <p>Other infant drinks / formulas:</p> <p>Chicken-based formula</p> <p>Home made meat based formula</p> | <p>There is very low certainty evidence about the effectiveness of other infant drinks/formulas.</p> <p>2 trials found that chicken based formula was associated with fewer allergic reactions in infants with cow's milk allergy than soy formula (n = 38)<sup>79</sup> and extensively hydrolyzed cow's milk formula (n = 67).<sup>80</sup> 1 non-randomized comparison found that a home-made meat-based formula reduced the severity of atopic dermatitis induced by various foods (not solely cow's milk).<sup>81</sup></p> | <p>There is insufficient evidence upon which to weigh up the potential harms versus benefits in food allergy so it is not possible to make an evidence-based recommendation about other infant drinks/formulas.</p> <p>There are risks related to home-made based formula outside of food allergy, which include nutritional content, renal solute load, osmolality and dehydration, food safety and allergic reactions due to ingredients.</p> | <p>We have no information about patient and care giver preferences and values related to other infant drinks.</p> | <p>Access to and use of other infant drinks / formulas varies in different parts of the world. It is probably not feasible in most places to use them routinely.</p> |

**TABLE S2.3: JUSTIFICATION FOR SUPPLEMENTS RECOMMENDATION**

**The GA<sup>2</sup>LEN Task Force makes no recommendation for or against any prebiotics, probiotics or synbiotics that have been evaluated so far for managing food allergy, whether used as a supplement or added to formula.**

| Intervention                                                                   | Evidence of effectiveness                                                                                                                                                                                                                                                                                                                                                                                                                                                                                                                                                                                                                                                                                                                       | Benefits versus harms                                                                                                                                                                                                                                                                                                                                                                             | Patient/care giver values                                                                                                                                                                                        | Feasibility and cost issues                                                                                                                                                                                                                                                                              |
|--------------------------------------------------------------------------------|-------------------------------------------------------------------------------------------------------------------------------------------------------------------------------------------------------------------------------------------------------------------------------------------------------------------------------------------------------------------------------------------------------------------------------------------------------------------------------------------------------------------------------------------------------------------------------------------------------------------------------------------------------------------------------------------------------------------------------------------------|---------------------------------------------------------------------------------------------------------------------------------------------------------------------------------------------------------------------------------------------------------------------------------------------------------------------------------------------------------------------------------------------------|------------------------------------------------------------------------------------------------------------------------------------------------------------------------------------------------------------------|----------------------------------------------------------------------------------------------------------------------------------------------------------------------------------------------------------------------------------------------------------------------------------------------------------|
| Probiotics as supplement                                                       | <p>We found insufficient evidence to draw conclusions. The certainty of evidence was very low.</p> <p>We found 5 trials (n = 401), each about a different probiotic strain or combination of strains in people of different ages and with various food allergies. The strains assessed are listed in the supplementary tables. 2 trials found that probiotic supplements were associated with a slight reduction in food allergy symptoms<sup>82,83</sup> and 3 did not.<sup>84-86</sup></p>                                                                                                                                                                                                                                                    | <p>We found insufficient evidence to draw conclusions.</p> <p>Of the 5 trials we identified, 4 did not provide data about adverse events and 1 found no difference in adverse events with probiotics.</p>                                                                                                                                                                                         | <p>There is limited evidence about patient and care giver preferences, and these preferences are likely to vary between individuals.</p> <p>Of the 5 trials we identified, none reported on quality of life.</p> | <p>There may be access and cost issues which preclude recommending this intervention routinely.</p> <p>There are a variety of strains and many have not been evaluated so far in clinical trials. Not all probiotics are the same. Each needs to be evaluated separately for its efficacy and safety</p> |
| Probiotics added to infant formula for infants with cow's milk protein allergy | <p>We found insufficient evidence to draw conclusions. The certainty of evidence was very low.</p> <p>We found 1 trial and 2 non-randomized comparisons of adding LGG to extensively hydrolyzed casein formula (n = 535) which resulted in small reductions in symptoms and suggested faster development of tolerance.<sup>87-89</sup></p> <p>3 trials of extensively hydrolyzed whey formula found that various probiotics were not associated with reduced symptoms (n = 95).<sup>90-92</sup> The strains assessed are listed in the supplementary tables.</p> <p>2 trials comparing extensively hydrolyzed whey and casein formula found that adding various probiotics did not improve symptoms or tolerance (n = 191).<sup>93,94</sup></p> | <p>We found insufficient evidence to draw conclusions. The trials reported that there were no adverse events from treatment.</p> <p>In some cases the potential benefits may outweigh the risks, except in immuno-compromised infants, but there is very low certainty of evidence and it is not advisable to group findings about different strains and different types of formula together.</p> | <p>There is limited evidence about patient and care giver preferences, and these preferences are likely to vary between individuals.</p>                                                                         | <p>There may be access and cost issues which preclude recommending this intervention routinely.</p> <p>There are a variety of strains and many have not been evaluated so far in clinical trials. Not all probiotics are the same. Each needs to be evaluated separately for its efficacy and safety</p> |



| <b>Intervention</b>                | <b>Evidence of effectiveness</b>                                                                                                                                                                                                                                                   | <b>Benefits versus harms</b>                                                                                                                 | <b>Patient/care giver values</b>                                                                                                  | <b>Feasibility and cost issues</b>                                                                                                                                                                                                                                                          |
|------------------------------------|------------------------------------------------------------------------------------------------------------------------------------------------------------------------------------------------------------------------------------------------------------------------------------|----------------------------------------------------------------------------------------------------------------------------------------------|-----------------------------------------------------------------------------------------------------------------------------------|---------------------------------------------------------------------------------------------------------------------------------------------------------------------------------------------------------------------------------------------------------------------------------------------|
| Prebiotics as supplement           | We found insufficient evidence to draw conclusions. We identified no trials meeting our eligibility criteria.                                                                                                                                                                      | We found insufficient evidence to draw conclusions.                                                                                          | There is limited evidence about patient and care giver preferences, and these preferences are likely to vary between individuals. | There may be access and cost issues which preclude recommending this intervention routinely. There are a variety of strains and many have not been evaluated so far in clinical trials.                                                                                                     |
| Prebiotics added to infant formula | We found insufficient evidence to draw conclusions. We identified no trials meeting our eligibility criteria.                                                                                                                                                                      | We found insufficient evidence to draw conclusions. One study not eligible for our review found no significant adverse events. <sup>95</sup> | There is limited evidence about patient and care giver preferences, and these preferences are likely to vary between individuals. | There may be access and cost issues which preclude recommending this intervention routinely.<br><br>There are a variety of strains and many have not been evaluated so far in clinical trials.                                                                                              |
| Synbiotics as supplement           | We found insufficient evidence to draw conclusions. We identified no trials meeting our eligibility criteria.                                                                                                                                                                      | We found insufficient evidence to draw conclusions.                                                                                          | There is limited evidence about patient and care giver preferences, and these preferences are likely to vary between individuals. | There may be access and cost issues which preclude recommending this intervention routinely.<br><br>There are a variety of strains and many have not been evaluated so far in clinical trials.                                                                                              |
| Synbiotics added to infant formula | We found insufficient evidence to draw conclusions. The certainty of evidence was very low.<br><br>1 trial of amino acid-based formula found that adding synbiotics did not improve symptoms (n = 110). <sup>96</sup> The strains assessed are listed in the supplementary tables. | We found insufficient evidence to draw conclusions. There was no negative impact on growth.                                                  | There is limited evidence about patient and care giver preferences, and these preferences are likely to vary between individuals. | There may be access and cost issues which preclude recommending this intervention routinely. There are a variety of strains and many have not been evaluated so far in clinical trials. Not all synbiotics are the same. Each needs to be evaluated separately for its efficacy and safety. |

**TABLE S2.4: NUMBER OF STUDIES SCREENED, INCLUDED AND EXCLUDED**

|                                                                         |                      |
|-------------------------------------------------------------------------|----------------------|
| Number of potential studies identified by database searches             | 2,135                |
| Number of additional potential studies identified through other sources | 12                   |
| Total number of studies screened once duplicates were removed           | 2,147                |
| Number of studies shortlisted for full text review                      | 50                   |
| Number of studies excluded after full text review                       | 11                   |
| Number and type of studies included                                     | 39 (30 RCTs, 9 CCTs) |

Note: see the end of this supplement for a list of the studies we excluded after screening the full text.

**TABLE S2.5: DETAILS OF STUDIES INCLUDED**

| Study             | Contributed to recommendation | Study type | Risk of bias | Region | Funding source | Total participants | Age | Allergy type    | Severity of allergy | Intervention                                                                                          | Comparator                                |
|-------------------|-------------------------------|------------|--------------|--------|----------------|--------------------|-----|-----------------|---------------------|-------------------------------------------------------------------------------------------------------|-------------------------------------------|
| Agostoni 2007     | Formula                       | CCT        | Moderate     | Europe | None           | 160                | <5y | Cow's milk, soy | Moderate to severe  | Soy formula                                                                                           | Casein hydrolysate or rice hydrolysate    |
| Berni Canani 2012 | Pre/pro/synbiotics            | RCT        | Moderate     | Europe | Industry       | 55                 | <5y | Cow's milk      | Moderate            | Cow's milk formula and Lactobacillus rhamnosus GG                                                     | Free diet                                 |
| Berni Canani 2013 | Formula<br>Pre/pro/synbiotics | CCT        | High         | Europe | None           | 260                | <5y | Cow's milk      | Moderate            | Extensively hydrolyzed with LGG or amino acid-based formula or hydrolyzed rice formula or soy formula | Extensively hydrolyzed cow's milk formula |
| Berni Canani 2017 | Formula<br>Pre/pro/synbiotics | RCT        | Moderate     | Europe | Industry       | 220                | <5y | Cow's milk      | Moderate            | Extensively hydrolyzed casein formula with Lactobacillus rhamnosus GG                                 | Extensively hydrolyzed casein formula     |
| Brouwer 2006      | Pre/pro/synbiotics            | RCT        | High         | Europe | Not industry   | 50                 | <5y | Cow's milk      | Unknown             | Extensively hydrolyzed whey formula with Lactobacillus rhamnosus or Lactobacillus GG.                 | Extensively hydrolyzed whey formula       |

| Study           | Contributed to recommendation | Study type | Risk of bias | Region | Funding source | Total participants | Age | Allergy type | Severity of allergy | Intervention                                                                                                                                                                                       | Comparator                                                                                                                                             |
|-----------------|-------------------------------|------------|--------------|--------|----------------|--------------------|-----|--------------|---------------------|----------------------------------------------------------------------------------------------------------------------------------------------------------------------------------------------------|--------------------------------------------------------------------------------------------------------------------------------------------------------|
| Burks 2015      | Formula<br>Pre/pro/synbiotics | RCT        | Low          | USA    | Industry       | 110                | <5y | Cow's milk   | Moderate            | Formula with synbiotic blend: prebiotics: chicory-derived neutral oligofructose, long-chain inulin and pectin-derived acidic oligosaccharide. Combined with probiotic Bifidobacterium breve M-16V. | Amino acid-based formula                                                                                                                               |
| Caffarelli 2002 | Formula                       | CCT        | High         | Europe | Unknown        | 20                 | <5y | Cow's milk   | Moderate            | Soy formula                                                                                                                                                                                        | Extensively hydrolyzed whey formula, partially hydrolyzed whey formula, extensively hydrolyzed casein formula, amino acid-based formula and cow's milk |
| Canani 2017     | Formula                       | RCT        | High         | Europe | Industry       | 40                 | <5y | Cow's milk   | Moderate            | Amino acid-based formula                                                                                                                                                                           | Extensively hydrolyzed whey formula                                                                                                                    |

| Study                                      | Contributed to recommendation | Study type | Risk of bias | Region      | Funding source | Total participants | Age   | Allergy type            | Severity of allergy | Intervention                                                                                                                                                                             | Comparator               |
|--------------------------------------------|-------------------------------|------------|--------------|-------------|----------------|--------------------|-------|-------------------------|---------------------|------------------------------------------------------------------------------------------------------------------------------------------------------------------------------------------|--------------------------|
| Candy 2018                                 | Pre/pro/synbiotics            | RCT        | Moderate     | Europe      | Industry       | 71                 | <5y   | Cow's milk              | Moderate            | Amino acid-based formula with synbiotic: prebiotic blend of chicory-derived neutral oligofructose and long-chain inulin and probiotic strain Bifidobacterium breve M-16V                 | Amino acid-based formula |
| Cantani 2006                               | Diet                          | CCT        | High         | Europe      | None           | 51                 | <5y   | Cow's milk, hen's egg   | Unknown             | Specific elimination diet                                                                                                                                                                | No intervention          |
| DuPont 2014<br>Hol 2008<br>DuPont 2015 BJN | Formula                       | RCT        | Low          | Europe      | Industry       | 75                 | <5y   | Cow's milk              | Unknown             | Amino acid-based formula                                                                                                                                                                 | Amino-acid formula       |
| DuPont 2015                                | Formula                       | RCT        | Low          | Europe      | Not industry   | 66                 | <5y   | Cow's milk              | Unknown             | Extensively hydrolyzed casein based                                                                                                                                                      | Standard formula         |
| Esmailzadeh 2018                           | Diet                          | RCT        | High         | Middle East | None           | 84                 | <5y   | Cow's milk              | Severe              | Baked muffin followed by baked pizza                                                                                                                                                     | No intervention          |
| Flinterman 2007                            | Pre/pro/synbiotics            | RCT        | High         | Europe      | Industry       | 13                 | <5y   | Cow's milk, egg, peanut | Unknown             | Probiotic strains (Lactobacillus (L.) acidophilus W55, L. casei W56, L. salivarius W57, Lactococcus (Lc.) lactis W58, Bifidobacterium (B.) infantis W52, B. lactis W18 and B. longum W51 | Placebo                  |
| Helin 2002                                 | Pre/pro/synbiotics            | RCT        | Low          | Europe      | Industry       | 36                 | 13+ y | Apple                   | Mild                | Lactobacillus rhamnosus                                                                                                                                                                  | No intervention          |

| Study                               | Contributed to recommendation | Study type | Risk of bias | Region      | Funding source | Total participants | Age | Allergy type                                     | Severity of allergy | Intervention                                                                      | Comparator                                      |
|-------------------------------------|-------------------------------|------------|--------------|-------------|----------------|--------------------|-----|--------------------------------------------------|---------------------|-----------------------------------------------------------------------------------|-------------------------------------------------|
| Hill 1995                           | Formula                       | CCT        | High         | Australasia | None           | 18                 | <5y | Cow's milk, hen's egg, wheat, soy, peanut, mixed | Moderate            | Soy formula                                                                       | Casein hydrolysate, or whey hydrolysate formula |
| Isolauri 1995                       | Formula                       | CCT        | High         | Europe      | None           | 45                 | <5y | Cow's milk, hen's egg, wheat                     | Moderate            | Amino acid-based formula                                                          | Extensively hydrolyzed whey formula             |
| Ivakhnenko 2013 and Ivakhnenko 2013 | Pre/pro/synbiotics            | RCT        | High         | Europe      | None           | 60                 | <5y | Cow's milk                                       | Moderate            | Probiotics: Bifidobacterium lactis BB-12 and Streptococcus thermophilus TH-4      | No intervention                                 |
| Jirapinyo 2007                      | Formula                       | RCT        | Moderate     | Asia        | Not industry   | 38                 | <5y | Cow's milk                                       | Moderate            | Chicken based formula                                                             | Soy formula                                     |
| Jirapinyo 2012                      | Formula                       | RCT        | High         | Asia        | Not industry   | 67                 | <5y | Cow's milk                                       | Moderate            | Chicken based formula                                                             | Extensively hydrolyzed casein formula           |
| Kirjavainen 2003                    | Formula<br>Pre/pro/synbiotics | RCT        | High         | Europe      | Not industry   | 45                 | <5y | Cow's milk                                       | Unknown             | Extensively hydrolyzed whey formula with viable LGG or with heat inactivated LGG; | Extensively hydrolyzed whey formula             |
| Klemola 2002 and Klemola 2005       | Formula                       | RCT        | Moderate     | Europe      | Industry       | 170                | <5y | Cow's milk                                       | Moderate            | Soy formula                                                                       | Extensively hydrolyzed whey formula             |
| Majamaa 1997                        | Pre/pro/synbiotics            | RCT        | High         | Europe      | Not industry   | 27                 | <5y | Cow's milk                                       | Moderate            | Extensively hydrolyzed formula with probiotic: Lactobacillus GG                   | Extensively hydrolyzed formula                  |

| Study                | Contributed to recommendation | Study type | Risk of bias | Region      | Funding source | Total participants | Age   | Allergy type         | Severity of allergy | Intervention                                                                        | Comparator                                |
|----------------------|-------------------------------|------------|--------------|-------------|----------------|--------------------|-------|----------------------|---------------------|-------------------------------------------------------------------------------------|-------------------------------------------|
| McLeish 1995         | Formula                       | RCT        | High         | Europe      | None           | 40                 | <5y   | Cow's milk           | Moderate            | Amino acid-based formula                                                            | Extensively hydrolyzed whey formula       |
| Niggemann 2001       | Formula                       | RCT        | High         | Europe      | Industry       | 73                 | <5y   | Cow's milk           | Moderate            | Amino acid-based formula                                                            | Extensively hydrolyzed formula            |
| Niggemann 2008       | Formula                       | RCT        | Low          | Europe      | Industry       | 65                 | <5y   | Cow's milk           | Moderate            | Extensively hydrolyzed formula                                                      | Amino acid-based formula                  |
| Nowak-Wegrzyn 2015   | Formula                       | RCT        | Moderate     | USA         | Industry       | 37                 | <5y   | Cow's milk           | Unknown             | New amino acid-based formula                                                        | Amino acid formula                        |
| Payot 2018           | Formula                       | RCT        | High         | Europe      | Industry       | 34                 | <5y   | Cow's milk and mixed | Moderate            | Amino acid-based yoghurt texture formula                                            | Amino acid-based formula                  |
| Reche 2010           | Formula                       | RCT        | High         | Europe      | Industry       | 92                 | <5y   | Cow's milk           | Unknown             | Hydrolyzed rice formula                                                             | Extensively hydrolyzed formula            |
| Salpietro 2005       | Formula                       | RCT        | Low          | Europe      | None           | 52                 | <5y   | Cow's milk           | Moderate            | Almond milk or, soy milk formula                                                    | Extensively hydrolyzed cow's milk formula |
| Savino 2005          | Formula                       | CCT        | High         | Europe      | None           | 88                 | <5y   | Cow's milk           | Unknown             | Rice- based hydrolysate formula, soy formula, extensively hydrolyzed casein formula | Free diet                                 |
| Seppo 2005           | Formula                       | RCT        | High         | Europe      | Not industry   | 168                | <5y   | Cow's milk           | Mild                | Soy formula                                                                         | Extensively hydrolyzed whey formula       |
| Sistek 2006          | Pre/pro/synbiotics            | RCT        | Moderate     | Australasia | Not industry   | 62                 | 0-12y | Mixed                | Unknown             | Probiotics (Lactobacillus rhamnosus and Bifidobacteria lactis)                      | Placebo                                   |
| Terheggen-Lagro 2002 | Formula                       | RCT        | Low          | Europe      | Industry       | 30                 | <5y   | Cow's milk           | Unknown             | Extensively hydrolyzed casein based formula with amino acids                        | Standard formula                          |

| Study                               | Contributed to recommendation | Study type | Risk of bias | Region | Funding source | Total participants | Age | Allergy type | Severity of allergy | Intervention                                                                                                                                                                                                                                                | Comparator                                                 |
|-------------------------------------|-------------------------------|------------|--------------|--------|----------------|--------------------|-----|--------------|---------------------|-------------------------------------------------------------------------------------------------------------------------------------------------------------------------------------------------------------------------------------------------------------|------------------------------------------------------------|
| Terracciano 2010                    | Formula                       | CCT        | Moderate     | Europe | Unknown        | 72                 | <5y | Cow's milk   | Moderate            | Soy formula or rice hydrolysate formula                                                                                                                                                                                                                     | Cows' milk extensively hydrolyzed formula                  |
| Vandenplas 2013                     | Formula<br>Pre/pro/synbiotics | RCT        | High         | Europe | Industry       | 116                | <5y | Cow's milk   | Mild                | Extensively hydrolyzed whey formula with Bifidobacterium lactis                                                                                                                                                                                             | Extensively hydrolyzed casein formula with Lactobcillus GG |
| Viljanen 2005 PAI and Viljanen 2005 | Pre/pro/synbiotics            | RCT        | Moderate     | Europe | industry       | 230                | <5y | Cow's milk   | Moderate            | Lactobacillus rhamnosus OR a mixture of probiotics: LGG 5x10 <sup>9</sup> cfu, L. rhamnosus LC705 5x10 <sup>9</sup> cfu, Bifidobacterium breve Bbi99 2x10 <sup>8</sup> cfu, and Propionibacterium freudenreichii ssp. Shermanii JS 2 x 10 <sup>9</sup> cfu, | Placebo                                                    |
| Vita 2007                           | Formula                       | RCT        | Moderate     | Europe | None           | 28                 | <5y | Cow's milk   | Moderate            | Goat's milk                                                                                                                                                                                                                                                 | Ass' milk                                                  |

Note: CCT = controlled clinical trial (non-randomized); RCT = randomized controlled trial



**TABLE S2.6: SUMMARY OF RISK OF BIAS**

**Risk of bias in randomized trials**

| Study                                      | Randomization process risk of bias | Risk of bias due to assignment | Risk of bias due to missing outcome data | Risk of bias due to outcome measurement | Risk of bias due to reported results | Overall risk of bias |
|--------------------------------------------|------------------------------------|--------------------------------|------------------------------------------|-----------------------------------------|--------------------------------------|----------------------|
| Berni Canani 2012                          | Low                                | Low                            | Low                                      | Low                                     | Low                                  | Low                  |
| Berni Canani 2017                          | Low                                | Low                            | Moderate                                 | Low                                     | Moderate                             | Moderate             |
| Brouwer 2006                               | Low                                | Low                            | Low                                      | High                                    | Low                                  | High                 |
| Burks 2015                                 | Low                                | Low                            | Low                                      | Low                                     | Low                                  | Low                  |
| Canani 2017                                | High                               | Moderate                       | Low                                      | Moderate                                | Low                                  | High                 |
| Candy 2018                                 | Low                                | Moderate                       | Low                                      | Low                                     | Moderate                             | Moderate             |
| DuPont 2014<br>Hol 2008<br>DuPont 2015 BJN | Low                                | Low                            | Low                                      | Low                                     | Low                                  | Low                  |
| DuPont 2015                                | Low                                | Low                            | Low                                      | Low                                     | Low                                  | Low                  |
| Esmaeilzadeh 2018                          | High                               | Moderate                       | Low                                      | Moderate                                | Moderate                             | High                 |
| Flinterman 2007                            | High                               | Low                            | High                                     | Low                                     | Low                                  | High                 |
| Helin 2002                                 | Unclear                            | Low                            | Low                                      | Low                                     | Low                                  | Low                  |
| Ivakhnenko 2013 and<br>Ivakhnenko 2013     | High                               | Low                            | Moderate                                 | High                                    | High                                 | High                 |
| Jirapinyo 2007                             | Moderate                           | Moderate                       | Moderate                                 | Moderate                                | Moderate                             | Moderate             |
| Jirapinyo 2012                             | High                               | Moderate                       | Moderate                                 | High                                    | Moderate                             | High                 |
| Kirjavainen 2003                           | High                               | Unclear                        | Unclear                                  | Low                                     | Low                                  | High                 |
| Klemola 2002<br>and Klemola 2005           | Low                                | Moderate                       | Low                                      | Moderate                                | Moderate                             | Moderate             |
| Majamaa 1997                               | High                               | High                           | Moderate                                 | High                                    | High                                 | High                 |
| McLeish 1995                               | High                               | Low                            | High                                     | Low                                     | Low                                  | High                 |
| Niggemann 2001                             | High                               | Moderate                       | Unclear                                  | Moderate                                | Moderate                             | High                 |
| Niggemann 2008                             | Low                                | Low                            | Low                                      | Low                                     | Low                                  | Low                  |
| Nowak-Wegrzyn<br>2015                      | Moderate                           | Low                            | Low                                      | Low                                     | Low                                  | Moderate             |
| Payot 2018                                 | Low                                | High                           | Low                                      | Low                                     | Low                                  | High                 |
| Reche 2010                                 | Moderate                           | High                           | Low                                      | Low                                     | Low                                  | High                 |

| Study                               | Randomization process risk of bias | Risk of bias due to assignment | Risk of bias due to missing outcome data | Risk of bias due to outcome measurement | Risk of bias due to reported results | Overall risk of bias |
|-------------------------------------|------------------------------------|--------------------------------|------------------------------------------|-----------------------------------------|--------------------------------------|----------------------|
| Salpietro 2005                      | Low                                | Low                            | Low                                      | Low                                     | Low                                  | Low                  |
| Seppo 2005                          | Low                                | High                           | High                                     | High                                    | Moderate                             | High                 |
| Sistek 2006                         | Low                                | Moderate                       | Low                                      | Low                                     | Moderate                             | Moderate             |
| Terheggen-Lagro 2002                | Low                                | Low                            | Low                                      | Low                                     | Low                                  | Low                  |
| Vandenplas 2013                     | Low                                | Low                            | High                                     | Low                                     | Moderate                             | High                 |
| Viljanen 2005 PAI and Viljanen 2005 | Low                                | Moderate                       | Moderate                                 | Low                                     | Moderate                             | Moderate             |
| Vita 2007                           | Low                                | Moderate                       | Low                                      | Low                                     | Low                                  | Moderate             |

### Risk of bias in non-randomized comparison studies

| Study             | Confounding | Selection issues | Issues defining interventions | Changes from intended interventions | Missing data | Measurement issues | Selective reporting | Overall risk of bias |
|-------------------|-------------|------------------|-------------------------------|-------------------------------------|--------------|--------------------|---------------------|----------------------|
| Agostoni 2007     | Low         | Low              | Low                           | Low                                 | Low          | Moderate           | Moderate            | Moderate             |
| Berni Canani 2013 | High        | High             | Low                           | Low                                 | Moderate     | Moderate           | Low                 | Moderate             |
| Caffarelli 2002   | Low         | Low              | High                          | High                                | High         | Low                | Moderate            | High                 |
| Cantani 2006      | High        | High             | Low                           | Moderate                            | Low          | Low                | High                | High                 |
| Hill 1995         | Moderate    | Low              | Moderate                      | Low                                 | High         | Low                | Low                 | High                 |
| Isolauri 1995     | High        | High             | Low                           | Low                                 | Low          | Moderate           | Low                 | High                 |
| Savino 2005       | High        | Moderate         | Low                           | Moderate                            | Low          | Low                | High                | High                 |
| Terracciano 2010  | Low         | Moderate         | Low                           | Low                                 | Low          | Low                | Low                 | Moderate             |

**TABLE S2.7: REASONS WHY STUDIES SCREENED AS FULL TEXT WERE EXCLUDED**

Note: many other studies were excluded after screening titles and abstracts

| Study                                                                                                                                                                                                                                                                                                | Reason not eligible                                                                     |
|------------------------------------------------------------------------------------------------------------------------------------------------------------------------------------------------------------------------------------------------------------------------------------------------------|-----------------------------------------------------------------------------------------|
| Agata 1993                                                                                                                                                                                                                                                                                           | No control group with food allergy                                                      |
| Berni Canani R, Nocerino R, Leone L, Di Costanzo M, Terrin G, Passariello A, Cosenza L, Troncone R. Tolerance to a new free amino acid-based formula in children with IgE or non-IgE-mediated cow's milk allergy: a randomized controlled clinical trial. <i>BMC Pediatr</i> 2013;13:24.             | Not RCT or CCT. All enrolled children had same study intervention/                      |
| Chafen JJ, Newberry SJ, Riedl MA, Bravata DM, Maglione M, Suttorp MJ, Sundaram V, Paige NM, Towfigh A, Hulley BJ, Shekelle PG. Diagnosing and managing common food allergies: a systematic review. <i>JAMA</i> 2010;303(18):1848-56                                                                  | Systematic review. Studies eligible for this review were extracted individually.        |
| de Silva D, Geromi M, Panesar SS, Muraro A, Werfel T, Hoffmann-Sommergruber K, Roberts G, Cardona V, Dubois AE, Halken S, Host A, Poulsen LK, Van Ree R, Vlieg-Boerstra BJ, Agache I, Sheikh A. Acute and long-term management of food allergy: systematic review. <i>Allergy</i> 2014;69(2):159-67. | Systematic review. Studies eligible for this review extracted individually              |
| <b>Fiocchi A, Sarratud P, Terracciano L, Vacca E, Bernardini R, Fuggetta D, Ballabio C, Duranti M, Magni C, Restani P. Assessment of the tolerance to lupine-enriched pasta in peanut-allergic children. <i>Clin Exp Allergy</i> 2009;39(7):1045-51.</b>                                             | Not RCT or CCT. Investigated lupine tolerance in a group of children allergic to peanut |
| Giampietro PG, Kjellman NI, Oldaeus G, Wouters-Wesseling W, Businco L. Hypoallergenicity of an extensively hydrolyzed whey formula. <i>Pediatr Allergy Immunol</i> 2001;12(2):83-6.                                                                                                                  | Not RCT or CCT                                                                          |
| Gorelova Zhlu, Ladodo KS, Levachev MM, Lupinovich VL, Mamonova LG, Orlova SV, Balabolkin II, Zadkova GF, Arutiunova MB. Role of polyunsaturated fatty acids in diet therapy of children with allergic diseases. <i>Vopr Pitan</i> 1999;68(1):31-5.                                                   | Text in Russian. Appeared not to be RCT or CCT                                          |
| Halken S, PAI 1993, Safety of a new, ultrafiltrated whey hydrolysate formula in children with cow milk allergy: a clinical investigation. <i>Pediatr Allergy Immunol</i> 1993;4(2):53-9.                                                                                                             | Not RCT or CCT                                                                          |
| Hill DJ, Murch SH, Rafferty K, Wallis P, Green CJ. The efficacy of amino acid-based formulas in relieving the symptoms of cow's milk allergy: a systematic review. <i>Clin Exp Allergy</i> 2007                                                                                                      | Systematic review. Studies eligible for this review extracted individually              |
| Inuo C, Tanaka K, Nakajima Y, Yamawaki K, Matsubara T, Iwamoto H, Tsuge I, Urisu A, Kondo Y. Tolerability of partially and extensively hydrolyzed milk formulas in children with cow's milk allergy. <i>Asia Pac J Clin Nutr</i> 2019;28(1):49-56.                                                   | Outcome not relevant                                                                    |
| <b>Luniakov AS, Shirina LI, Kruglik VI, Shatskaia NG.</b> Use of new domestic foodstuffs in the treatment of digestive system diseases with food intolerance. <i>Vopr Pitan</i> 1993;(5):25-7.                                                                                                       | Text in Russian. Appeared not to be RCT or CCT                                          |
| Paparo L, Nocerino R, Bruno C, Di Scala C, Cosenza L, Bedogni G, Di Costanzo M, Mennini M, D'Argenio V, Salvatore F, Berni Canani R. Randomized controlled trial                                                                                                                                     | Outcome not relevant                                                                    |

| Study                                                                                                                                                                                                                                  | Reason not eligible                                                         |
|----------------------------------------------------------------------------------------------------------------------------------------------------------------------------------------------------------------------------------------|-----------------------------------------------------------------------------|
| on the influence of dietary intervention on epigenetic mechanisms in children with cow's milk allergy: the EPICMA study. <i>Sci Rep</i> 2019;9(1):2828.                                                                                |                                                                             |
| Pohjavuori E, Viljanen M, Korpela R, Kuitunen M, Tiittanen M, Vaarala O, Savilahti E. Lactobacillus GG effect in increasing IFN-gamma production in infants with cow's milk allergy. <i>J Allergy Clin Immunol</i> 2004;114(1):131-6.  | Outcome not relevant                                                        |
| Qamer S, Deshmukh M, Patole S. Probiotics for cow's milk protein allergy: a systematic review of randomized controlled trials. <i>Eur J Pediatr</i> 2019;178(8):1139-1149.                                                             | Systematic review. Studies eligible for this review extracted individually  |
| Sampson HA, Bernhisel-Broadbent J, Yang E, Scanlon SM. Safety of casein hydrolysate formula in children with cow milk allergy. <i>J Pediatr</i> 1991;118(4 Pt 1):520-5.                                                                | Not RCT or CCT                                                              |
| Sampson HA, James JM, Bernhisel-Broadbent J. Safety of an amino acid-derived infant formula in children allergic to cow milk. <i>Pediatrics</i> 1992;90(3):463-5.                                                                      | Not RCT or CCT                                                              |
| <b>Santos SCD, Konstantyner T, Cocco RR.</b> Effects of probiotics in the treatment of food hypersensitivity in children: a systematic review. <i>Allergol Immunopathol</i> 2020;48(1):95-104.                                         | Systematic review. Studies eligible for this review extracted individually  |
| Scalabrin D, Harris C, Johnston WH, Berseth CL. Long-term safety assessment in children who received hydrolyzed protein formulas with <i>Lactobacillus rhamnosus</i> GG: a 5-year follow-up. <i>Eur J Pediatr</i> 2017;176(2):217-224. | Not eligible for our review. Investigated healthy children, no food allergy |
| Scott JF, Hammond MI, Nedorost ST. Food avoidance diets for dermatitis. <i>Curr Allergy Asthma Rep</i> 2015;15(10):60.                                                                                                                 | Systematic review. Not relevant. On dermatitis, not food allergy            |
| Stróżyk A, Horvath A, Meyer R, Szajewska H. Efficacy and safety of hydrolyzed formulas for cow's milk allergy management: A systematic review of randomized controlled trials. <i>Clin Exp Allergy</i> 2020;50(7):766-779.             | Systematic review. Studies eligible for this review extracted individually  |
| Tang ML, Ponsonby AL, Orsini F, Tey D, Robinson M, Su EL, Licciardi P, Burks W, Donath S. Administration of a probiotic with peanut oral immunotherapy: A randomized trial. <i>J Allergy Clin Immunol</i> . 2015;135(3):737-44.e8.     | Not eligible for our review. Study is about OIT                             |
| Zibae S, Hosseini SM, Yousefi M, Taghipour A, Kiani MA, Noras MR. Nutritional and therapeutic characteristics of camel milk in children: a systematic review. <i>Electron Physician</i> 2015;7(7):1523-8.                              | Systematic review. No studies eligible for this review included.            |

## Online supplement 3: allergen immunotherapy

This supplement summarises our reasoning behind recommendations about allergen immunotherapy. The recommendation justifications are summarised first, followed by details about the studies we included in drawing our conclusions.

**TABLE S3.1: JUSTIFICATION OF RECOMMENDATION FOR PEANUT ORAL IMMUNOTHERAPY**

**The GA2LEN Task Force recommends offering peanut oral immunotherapy under specialist supervision with standardized evidence-based protocols using peanut products (or licensed pharmaceutical products, where appropriate), to selected children (aged 4+ years) with clinically diagnosed, severe, IgE-mediated, peanut allergy to increase the amount of peanut tolerated while on therapy.**

| Intervention                        | Evidence of effectiveness                                                                                                                                                                                                                                                                                                                                                                                                                                                                                                                                       | Benefits versus harms                                                                                                                                                                                                                                                                                                                                                                                                                                                                                                                                                                                                                                                                                                                                                                                                                                                                                                                                                                                                             | Patient/care giver values                                                                                                                                                                                                                                                                                                                                                                                                                                                                                                                                                                                                                                                                                                                                                                                                                                                            | Feasibility and cost                                                                                                                                                                                                                                                                                                                                                                                                                                                                                                                                                                                                                                                                                                                                                                                                                                                                                            |
|-------------------------------------|-----------------------------------------------------------------------------------------------------------------------------------------------------------------------------------------------------------------------------------------------------------------------------------------------------------------------------------------------------------------------------------------------------------------------------------------------------------------------------------------------------------------------------------------------------------------|-----------------------------------------------------------------------------------------------------------------------------------------------------------------------------------------------------------------------------------------------------------------------------------------------------------------------------------------------------------------------------------------------------------------------------------------------------------------------------------------------------------------------------------------------------------------------------------------------------------------------------------------------------------------------------------------------------------------------------------------------------------------------------------------------------------------------------------------------------------------------------------------------------------------------------------------------------------------------------------------------------------------------------------|--------------------------------------------------------------------------------------------------------------------------------------------------------------------------------------------------------------------------------------------------------------------------------------------------------------------------------------------------------------------------------------------------------------------------------------------------------------------------------------------------------------------------------------------------------------------------------------------------------------------------------------------------------------------------------------------------------------------------------------------------------------------------------------------------------------------------------------------------------------------------------------|-----------------------------------------------------------------------------------------------------------------------------------------------------------------------------------------------------------------------------------------------------------------------------------------------------------------------------------------------------------------------------------------------------------------------------------------------------------------------------------------------------------------------------------------------------------------------------------------------------------------------------------------------------------------------------------------------------------------------------------------------------------------------------------------------------------------------------------------------------------------------------------------------------------------|
| OIT in children with peanut allergy | <p>We have high certainty evidence that children with IgE-mediated allergy to peanuts tolerate significantly more peanut while on therapy (RR 6.50, 95%CI 3.31-12.75, N=888) (desensitization).<sup>97</sup> The number needed to treat to achieve 1 child tolerating 300mg or 1000mg peanut protein as a single dose while on therapy was 2.</p> <p>There is low certainty evidence that this benefit persists after therapy discontinues (RR 8.75, 1.24-61.57, n=85).</p> <p>The impact on quality of life is unclear due to very low certainty evidence.</p> | <p>Overall, the benefits of OIT for peanut allergy outweigh the risks in selected children. There was no difference in adverse events between the OIT and control group (RR 1.07, 95% CI 0.99 to 1.16, n=953). Severe reactions were rare and not significantly different between OIT and control groups (RR 1.55, 95%CI 0.69 to 3.48, n=950).<sup>97</sup> However, some studies have excluded extremely allergic individuals so safety in these individuals is unclear</p> <p>A systematic review meta-analysed the different quality of life outcomes used in OIT studies. They found a -0.56 (95%CI - 0.92 to -0.20) standardised mean difference between active and control, which means that immunotherapy may improve quality of life.<sup>98</sup></p> <p>Eosinophilic esophagitis has been reported in relation to OIT, although its prevalence is unknown due to a high rate of transient abdominal symptoms compatible with EoE<sup>99,100</sup> but endoscopic confirmation lacking in most of these individuals.</p> | <p>OIT needs a considerable investment in time from the family. It may also be associated with local adverse effects so some families may prefer to avoid peanut instead. Adherence is important and should be considered especially with adolescents. However, desensitization may be valuable to people with food allergy as it reduces the chance of experiencing a reaction with packaged foodstuffs containing peanut accidentally.<sup>105</sup></p> <p>Although OIT is associated with adverse events, care givers report that these events are “expected” during the treatment and families are well trained and closely monitored to deal with them better than with the uncertainty of unexpected reactions of full avoidance.<sup>106</sup></p> <p>However there is likely a need for lifetime therapy given the low rate of sustained unresponsiveness.<sup>97</sup></p> | <p>A pharmaceutical product has been licensed in Europe and the United States. Many other groups have used non-pharmaceutical formulations.<sup>103,104,107</sup> In some EU countries only licensed products will be allowed . This is based on the consideration that they have been developed according to Good manufacturing practice (GMP) for ensuring consistency of allergen content and biologic potency across the doses and product batches.</p> <p>Treatment is usually given daily, for years, and this represents a significant burden, which may result in lack of adherence and subsequent loss of protection and rise in accidental reactions.<sup>108-109</sup> In the mid/long term, the taste of the treatment may become an issue.<sup>107</sup></p> <p>Treatment needs to be provided in an appropriate setting by experienced doctors but these centres are not equally distributed,</p> |

| Intervention | Evidence of effectiveness | Benefits versus harms                                                                                                                                                                                                                                                                                                                                                                                                                                                                                                                                                                                                                                                                                                                                                                                                       | Patient/care giver values | Feasibility and cost                                                                                                                                                                                                                                                                                                                                                                                                                                                     |
|--------------|---------------------------|-----------------------------------------------------------------------------------------------------------------------------------------------------------------------------------------------------------------------------------------------------------------------------------------------------------------------------------------------------------------------------------------------------------------------------------------------------------------------------------------------------------------------------------------------------------------------------------------------------------------------------------------------------------------------------------------------------------------------------------------------------------------------------------------------------------------------------|---------------------------|--------------------------------------------------------------------------------------------------------------------------------------------------------------------------------------------------------------------------------------------------------------------------------------------------------------------------------------------------------------------------------------------------------------------------------------------------------------------------|
|              |                           | <p>The baseline reactivity threshold of people included in most trials is very low, ranging from 10mg<sup>101</sup> up to 122mg<sup>102</sup> of peanut protein. It is unclear whether the risk/benefit balance remains the same in people with higher reactivity thresholds</p> <p>Given the logistics around peanut oral immunotherapy and the potential for reactions, we consider that it is indicated in children with severe peanut allergy. This includes those with a substantial risk of severe reactions and those with substantially impaired quality of life. This has to be a shared judgement between the healthcare professional and family.</p> <p>There is some evidence that OIT may reduce the severity of the reactions in addition to increasing the threshold for reaction.<sup>101,103,104</sup></p> |                           | <p>leading to inequity in access to treatment.<sup>110</sup></p> <p>Some precautions when administering the treatment are significantly limiting: avoiding exercise/hot shower, infections, intake of NSAIDs, fasting or other cofactors.<sup>111</sup></p> <p>One US health economics study estimated a high incremental cost effectiveness ratio of \$255 431 for an 80 year time horizon based on societal costs, but this has not been replicated.<sup>112</sup></p> |

**TABLE S3.2: JUSTIFICATION OF RECOMMENDATION FOR PEANUT EPICUTANEOUS IMMUNOTHERAPY**

The GA2LEN Task Force suggests offering peanut epicutaneous immunotherapy under specialist supervision using licensed pharmaceutical products if they become available to selected children aged 4-11 years with clinically diagnosed, severe, IgE-mediated, peanut allergy to increase the amount of peanut tolerated while on therapy.

| Intervention                                | Evidence of effectiveness                                                                                                                                                                                                                                                                                                                                                                                                                                                                                                                                                                                   | Benefits versus harms                                                                                                                                                                                                                                                                                                                                                                                                                                                                                                                                                                                                                           | Patient/care giver values                                                                                                                                                                                                                                                                                                              | Feasibility and cost                                                                                                                                                                                                                                                                                                                                                  |
|---------------------------------------------|-------------------------------------------------------------------------------------------------------------------------------------------------------------------------------------------------------------------------------------------------------------------------------------------------------------------------------------------------------------------------------------------------------------------------------------------------------------------------------------------------------------------------------------------------------------------------------------------------------------|-------------------------------------------------------------------------------------------------------------------------------------------------------------------------------------------------------------------------------------------------------------------------------------------------------------------------------------------------------------------------------------------------------------------------------------------------------------------------------------------------------------------------------------------------------------------------------------------------------------------------------------------------|----------------------------------------------------------------------------------------------------------------------------------------------------------------------------------------------------------------------------------------------------------------------------------------------------------------------------------------|-----------------------------------------------------------------------------------------------------------------------------------------------------------------------------------------------------------------------------------------------------------------------------------------------------------------------------------------------------------------------|
| <p>EPIT in children with peanut allergy</p> | <p>This recommendation is based on moderate certainty evidence for individuals with IgE-mediated allergy to peanuts tolerating significantly more peanut while on therapy (RR 2.63, 95%CI 1.79 to 3.84, n=651).<sup>97</sup> The effectiveness appears to be less both in magnitude and in number needed to treat than for peanut OIT</p> <p>There is no controlled data focused on sustained unresponsiveness).</p> <p>The impact on quality of life was unclear due to very low quality of evidence. One study demonstrated a small improvement in quality of life compared to placebo.<sup>113</sup></p> | <p>Overall, the benefits of EPIT for peanut allergy may outweigh the risks in children with severe allergy. A conditional rather than a strong recommendation is made for EPIT as the magnitude of the benefit is not as large as for peanut OIT and the evidence is less certain. It also needs a pharmaceutical product and one is not currently licensed nor available.</p> <p>The vast majority of adverse events are local reactions. Severe reactions are rare. The peanut EPIT safety profile may be better than for OIT so this approach could be considered for children with severe allergy when the treatment becomes available.</p> | <p>Although there are no data on sustained unresponsiveness, extrapolation from other forms of allergen immunotherapy suggests that lifelong therapy will be required for maintained effectiveness. Although EPIT is less demanding for people, such a commitment may not suit everyone. Some may find it easier to avoid peanuts.</p> | <p>The EPIT approach necessitates a pharmaceutical preparation. This comes with increased cost, potentially reducing access to the approach.</p> <p>A product is not currently available commercially and none has been approved by a regulatory authority. Given the mechanism of delivery, other products (should they become available) may not be comparable.</p> |

**TABLE S3.3: JUSTIFICATION OF RECOMMENDATION FOR EGG AND MILK OIT**

**The GA2LEN Task Force suggests offering oral immunotherapy under specialist supervision with standardized evidence-based protocols using food products to selected children (aged 4+ years) with clinically diagnosed persistent severe IgE-mediated hen’s egg or cow’s milk allergy to increase the amount of allergen tolerated while on therapy.**

| Intervention                                   | Evidence of effectiveness                                                                                                                                                                                                                                                                                                                                                                                                                                            | Benefits versus harms                                                                                                                                                                                                                                                                                                                                                                                                                                                                                                                                                                                                                                                                                                                                                                                                                                                                                                                                                                                                                                                                                                                                                                                                                                                                     | Patient/care giver values                                                                                                                                                                                                                                                                                                                                                                                                                                                                                                                                                                                                                              | Feasibility and cost                                                                                                                                                                                                                                                                                                                                                                                                                                                                                                                                                                                                                                                                                                                  |
|------------------------------------------------|----------------------------------------------------------------------------------------------------------------------------------------------------------------------------------------------------------------------------------------------------------------------------------------------------------------------------------------------------------------------------------------------------------------------------------------------------------------------|-------------------------------------------------------------------------------------------------------------------------------------------------------------------------------------------------------------------------------------------------------------------------------------------------------------------------------------------------------------------------------------------------------------------------------------------------------------------------------------------------------------------------------------------------------------------------------------------------------------------------------------------------------------------------------------------------------------------------------------------------------------------------------------------------------------------------------------------------------------------------------------------------------------------------------------------------------------------------------------------------------------------------------------------------------------------------------------------------------------------------------------------------------------------------------------------------------------------------------------------------------------------------------------------|--------------------------------------------------------------------------------------------------------------------------------------------------------------------------------------------------------------------------------------------------------------------------------------------------------------------------------------------------------------------------------------------------------------------------------------------------------------------------------------------------------------------------------------------------------------------------------------------------------------------------------------------------------|---------------------------------------------------------------------------------------------------------------------------------------------------------------------------------------------------------------------------------------------------------------------------------------------------------------------------------------------------------------------------------------------------------------------------------------------------------------------------------------------------------------------------------------------------------------------------------------------------------------------------------------------------------------------------------------------------------------------------------------|
| <p>OIT for children with hen’s egg allergy</p> | <p>There is moderate certainty evidence that children aged 3-15 years with IgE-mediated allergy to hen’s egg tolerated significantly more hen’s egg while on therapy (RR 8.91, 95%CI 4.42-17.95, n=259, 5 studies).<sup>97</sup></p> <p>There is low certainty evidence that this benefit persists after therapy is discontinued (RR 7.12, 1.73-29.36, n=91, 2 studies).<sup>97</sup> The impact on quality of life unclear due to very low quality of evidence.</p> | <p>Overall, the benefits of OIT for hen’s egg allergy outweigh the risks in children with severe egg allergy. Severe means that they are at risk of severe reactions involving cardiorespiratory issues or are suffering from substantially impaired quality of life as a result of their allergy. The points in the general indications and contraindications Table should be noted (see Box 4 of main text)</p> <p>OIT for hen’s egg allergy increases the proportion of children who experience adverse events compared to an elimination diet (RR 7.01, 95%CI 2.49 to 19.75, n=291). Severe reactions and the use of adrenaline were rare and not significantly increased in the OIT group (risk difference 0.05, 95%CI 0.00 to 0.11, n=211 and 0.05, 95%CI -0.01 to 0.11, n=186 respectively). There were no life-threatening reactions.<sup>97</sup></p> <p>Young children and older children up to 8-10 years old are likely to outgrow their egg allergy if sensitization levels are low so the benefit of the intervention may be lower for them.</p> <p>There is no evidence to whether raw or cooked egg should be recommended, although most of the evidence is for raw egg. Theoretically cooked egg OIT would offer less protection against large amounts of ovalbumin.</p> | <p>OIT needs a considerable investment in time from people with food allergy and their care givers. It may also be associated with local adverse effects so some people with food allergy and their care givers may prefer to avoid hen’s egg instead. Care givers of young children may prefer to wait to see if they outgrow their egg allergy. The decision to commence OIT should therefore be individualized using a shared decision making processes with people with food allergy and their care givers.</p> <p>People with egg allergy may have a preference for not eating large amounts of raw egg. Cooked egg may be simpler to manage.</p> | <p>There are no standardized products or harmonized protocols for egg OIT.</p> <p>Real-life studies have found that it is feasible to use grocery bought food, which is low cost and easily accessible.<sup>114-118</sup></p> <p>For countries that do not allow a non-pharmaceutical based approach, a pharmaceutical based product is not yet available and will likely be expensive. This is likely to make this approach less feasible.</p> <p>Even in countries that allow a non-pharmaceutical based approach, the lack of allergy specialists limit the possibility of offering the treatment to all that would desire it.</p> <p>The use of raw material poses a risk of Salmonella infection unless this is pasteurized.</p> |



| Intervention                                    | Evidence of effectiveness                                                                                                                                                                                                                                                                                                                                                                         | Benefits versus harms                                                                                                                                                                                                                                                                                                                                                                                                                                                                                                                                                                                                                                                                                              | Patient/care giver values                                                                                                                                                                                                                                                                                                                                                                                                                                                                                                                                                                                                  | Feasibility and cost                                                                                                                                                                                                                                                                                                                                                                                                                                                                                                                                                                                                                                                                                                                                                                                                |
|-------------------------------------------------|---------------------------------------------------------------------------------------------------------------------------------------------------------------------------------------------------------------------------------------------------------------------------------------------------------------------------------------------------------------------------------------------------|--------------------------------------------------------------------------------------------------------------------------------------------------------------------------------------------------------------------------------------------------------------------------------------------------------------------------------------------------------------------------------------------------------------------------------------------------------------------------------------------------------------------------------------------------------------------------------------------------------------------------------------------------------------------------------------------------------------------|----------------------------------------------------------------------------------------------------------------------------------------------------------------------------------------------------------------------------------------------------------------------------------------------------------------------------------------------------------------------------------------------------------------------------------------------------------------------------------------------------------------------------------------------------------------------------------------------------------------------------|---------------------------------------------------------------------------------------------------------------------------------------------------------------------------------------------------------------------------------------------------------------------------------------------------------------------------------------------------------------------------------------------------------------------------------------------------------------------------------------------------------------------------------------------------------------------------------------------------------------------------------------------------------------------------------------------------------------------------------------------------------------------------------------------------------------------|
| <p>OIT for children with cow's milk allergy</p> | <p>This recommendation is based on moderate certainty evidence for children with IgE-mediated allergy to cow's milk tolerating significantly more milk while on therapy (RR 5.67, 95%CI 1.92 to 16.71, n=249). There is considerable heterogeneity between studies.<sup>97</sup></p> <p>There was no randomized controlled evidence focused on sustained unresponsiveness or quality of life.</p> | <p>Overall, the benefits of oral immunotherapy for cow's milk allergy outweighs the risks in children at risk.</p> <p>OIT for cow's milk allergy increases the proportion of children who experience adverse events compared to placebo or an elimination diet (RR 3.94, 95%CI 2.06 to 7.51, n=220). Severe reactions and the use of adrenaline were rare and not significantly different in OIT and control groups (risk difference 0.01, 95%CI -0.04 to 0.05 and 0.04, 95% CI 0.03 to 0.11 respectively). Only 1 life-threatening reactions was reported.<sup>97</sup></p> <p>Eosinophilic esophagitis has been seen in around 5% of individuals undergoing milk OIT in real life studies.<sup>119,120</sup></p> | <p>OIT needs a considerable investment in time from the family. It may also be associated with adverse effects so some families may prefer to avoid cow's milk instead.</p> <p>Most younger children outgrow their cow's milk allergy. Care givers are often interested in a treatment for cow's milk allergy as milk is so common in the diet so that accidental exposures are common. Milk is the main cause number of anaphylaxis in children in Europe.</p> <p>The decision to commence OIT should be individualized using a shared decision making processes with people with food allergy and their care givers.</p> | <p>There is considerable experience with oral immunotherapy for cow's milk allergy.<sup>110</sup></p> <p>Real-life studies have found that it is feasible to use grocery bought food, which is low cost and easily accessible.<sup>114-118</sup></p> <p>For countries that do not allow non-pharmaceutical based approach, a pharmaceutical based product is not yet available and will likely be expensive, making this approach less available.</p> <p>Even in countries that allow a non-pharmaceutical based approach, the lack of allergy resources and specialists limit the possibility of offering the treatment to all that would desire it.</p> <p>In contrast to what happens with peanut and egg, administering very small amounts of milk in the first stages of the treatment is relatively easy.</p> |

**TABLE S3.4: JUSTIFICATION FOR NOT RECOMMENDING FOR OR AGAINST OTHER IMMUNOTHERAPY**

| Intervention                                        | Evidence of effectiveness                                                                                                                                                                                                                                                                                                        | Benefits versus harms                                                                                                                                                                                                 | Patient/care giver values                                                                                                                                                                                                                                                               | Feasibility and cost                                                                                                                                                                                                                                                                                                                                   |
|-----------------------------------------------------|----------------------------------------------------------------------------------------------------------------------------------------------------------------------------------------------------------------------------------------------------------------------------------------------------------------------------------|-----------------------------------------------------------------------------------------------------------------------------------------------------------------------------------------------------------------------|-----------------------------------------------------------------------------------------------------------------------------------------------------------------------------------------------------------------------------------------------------------------------------------------|--------------------------------------------------------------------------------------------------------------------------------------------------------------------------------------------------------------------------------------------------------------------------------------------------------------------------------------------------------|
| OIT for adults with IgE-mediated peanut allergy     | We make no recommendation for or against OIT in adults with hen's egg allergy because there is insufficient evidence to draw conclusions. The certainty of evidence is very low. <sup>97</sup>                                                                                                                                   | There was insufficient evidence available to weigh up benefits versus harms. The intervention could be considered in adults with food allergy where the likely benefit outweighs potential adverse effects.           | The burden of the treatment probably is likely to be higher in adults because of the high number of visits to the allergy centre for dosing clashing against working duties. Additionally, adults are likely to have adapted to their peanut allergy such that its impact is minimised. | A pharmaceutical product is licensed in Europe and the United States for children. The same comments as in Table S3.1 related to children apply here.                                                                                                                                                                                                  |
| EPIT for adolescents and adults with peanut allergy | We make no recommendation for or against EPIT in adolescents and adults with peanut allergy because there is insufficient evidence to draw conclusions. The certainty of evidence is very low. <sup>97</sup> Data from two studies found no significant impact on peanut allergy in a small number of adults. <sup>121,122</sup> | There was insufficient evidence available to weigh up benefits versus harms                                                                                                                                           | No data available.                                                                                                                                                                                                                                                                      | The EPIT approach necessitates a pharmaceutical preparation. This comes with increased cost potentially reducing access to the approach. A product is not currently available commercially and none has been approved by a regulatory authority. Given the mechanism of delivery, other products (should they become available) may not be comparable. |
| SCIT for patients of any age with peanut allergy    | We make no recommendation for or against SCIT in people with peanut allergy because there is insufficient evidence to draw conclusions. The certainty of evidence is very low. <sup>97</sup>                                                                                                                                     | Only 2 very small trials assessed the effectiveness of SCIT for peanut allergy. <sup>123,124</sup> Both had a high rate of systemic reactions making SCIT unacceptable for routine use in people with peanut allergy. | No data available, but may be of interest to people with peanut allergy as treatment could be given once per week or month.                                                                                                                                                             | Existing studies are almost 30 years old and used aqueous extracts. New forms of subcutaneous immunotherapy may be possible.                                                                                                                                                                                                                           |
| SLIT for patients of any age with peanut allergy    | We make no recommendation for or against SLIT in patents with peanut allergy because there is insufficient evidence to draw conclusions. The certainty of evidence is very low. <sup>97</sup>                                                                                                                                    | Adverse effects are predominately local. There are much less than for oral immunotherapy and no reactions required adrenaline injection. <sup>97</sup>                                                                | No data available                                                                                                                                                                                                                                                                       | No specific product available outside the research setting.                                                                                                                                                                                                                                                                                            |

| <b>Intervention</b>                                  | <b>Evidence of effectiveness</b>                                                                                                                                                                                         | <b>Benefits versus harms</b>                                                                                                                                                              | <b>Patient/care giver values</b>                                                                                                                              | <b>Feasibility and cost</b>                                        |
|------------------------------------------------------|--------------------------------------------------------------------------------------------------------------------------------------------------------------------------------------------------------------------------|-------------------------------------------------------------------------------------------------------------------------------------------------------------------------------------------|---------------------------------------------------------------------------------------------------------------------------------------------------------------|--------------------------------------------------------------------|
| OIT for adults with IgE-mediated hen's egg allergy   | We make no recommendation for or against OIT in adults with hen's egg allergy because there is insufficient evidence to draw conclusions. The certainty of evidence is very low. <sup>97</sup>                           | There was insufficient evidence available to weigh up benefits versus harms. The intervention could be considered in adults where the likely benefit outweighs potential adverse effects. | Given the very low likelihood of spontaneous resolution and the ubiquitous nature of egg in our diet, adults may be keen to at least attempt desensitization. | The same comments as in Table S3.2 related to children apply here. |
| EPIT for patients of any age with cow's milk allergy | We make no recommendation for or against EPIT in patients with cow's milk because there is insufficient evidence to draw conclusions. The certainty of evidence is very low. <sup>97</sup> We identified only one trial. | There was insufficient evidence available to weigh up benefits versus harms. 1 small trial found slightly more adverse events with active doses compared to placebo. <sup>125</sup>       | No data available                                                                                                                                             | There is no commercially available product.                        |
| SLIT for patients of any age with cow's milk allergy | We make no recommendation for or against EPIT in patients with cow's milk because there is insufficient evidence to draw conclusions. The certainty of evidence is very low. <sup>97</sup> We identified only one trial. | There was insufficient evidence available to weigh up benefits versus harms.                                                                                                              | No data available                                                                                                                                             | There is no commercially available product.                        |

| Intervention                 | Evidence of effectiveness                                                                                                                                                                                                                                                                                                                                                                                                                                | Benefits versus harms                                                                                                                                                                                                                                                                                                                                                                                                                                                     | Patient/care giver values                                                                                                                                                                                                                                                                                                                                                                                | Feasibility and cost                                                                                                                                                                                                                                                                                                                                                                                                                                                                                                                                                                                                                                                          |
|------------------------------|----------------------------------------------------------------------------------------------------------------------------------------------------------------------------------------------------------------------------------------------------------------------------------------------------------------------------------------------------------------------------------------------------------------------------------------------------------|---------------------------------------------------------------------------------------------------------------------------------------------------------------------------------------------------------------------------------------------------------------------------------------------------------------------------------------------------------------------------------------------------------------------------------------------------------------------------|----------------------------------------------------------------------------------------------------------------------------------------------------------------------------------------------------------------------------------------------------------------------------------------------------------------------------------------------------------------------------------------------------------|-------------------------------------------------------------------------------------------------------------------------------------------------------------------------------------------------------------------------------------------------------------------------------------------------------------------------------------------------------------------------------------------------------------------------------------------------------------------------------------------------------------------------------------------------------------------------------------------------------------------------------------------------------------------------------|
| AIT for other food allergies | <p>We make no recommendation for or against any form of immunotherapy in patents with other food allergies because there is insufficient evidence to draw conclusions. The certainty of evidence is very low.<sup>97</sup></p> <p>The few randomized trials available focused on wheat,<sup>126</sup> hazelnut<sup>127</sup> and peach<sup>128</sup> plus a study that included participants with milk, egg, fish or apple allergy (Patriarca 1998).</p> | <p>AIT should only be considered in people with other food allergies where the likely benefit outweighs potential adverse effects. In general, immunotherapy was associated with increased adverse reactions compared to the comparator group.<sup>97</sup></p> <p>There is no evidence to date that OIT would not be effective or would pose significantly more risk with other food allergens than with egg, peanut and cow's milk, but robust evidence is lacking.</p> | <p>We do not know to what extent we can extrapolate results from one food to another. The decision to offer AIT will be influenced by people with food allergy and their care givers' tolerance to uncertainty.</p> <p>The impact on quality of life of people with atypical food allergens can be worsened by a greater lack of control, labelling and social recognition of these rarer allergens.</p> | <p>Many people have food allergies to uncommon foods for which we are unlikely to ever have high quality data, thus raising questions in terms of equity in access.</p> <p>Commercial products are unlikely to be developed for all the potential food allergies.</p> <p>Non-randomized studies have shown the feasibility of OIT with various grocery bought food including almond, apple, cashew, fish, hazelnut, orange, mustard, peach juice, pecan, pistachio, sesame, shrimp, soy, walnut, wheat, barley, brazil nuts, sunflower, buckwheat, chickpea, chicken, potato, yellow pea, lentils, chia seed, linseed, macadamia, oat, pineapple, pine nuts and scallops.</p> |

**TABLE S3.5: NUMBER OF STUDIES SCREENED, INCLUDED AND EXCLUDED**

|                                                                         |        |
|-------------------------------------------------------------------------|--------|
| Number of potential studies identified by database searches             | 12,723 |
| Number of additional potential studies identified through other sources | 119    |
| Total number of studies screened once duplicates were removed           | 12,842 |
| Number of studies shortlisted for full text review                      | 48     |
| Number of studies excluded after full text review                       | 11     |
| Number and type of studies included                                     | 37     |

Note: see the end of this supplement for a list of the studies we excluded after screening the full text.

**TABLE S3.6: DETAILS OF STUDIES INCLUDED**

| Study                              | Allergy type | Admin route  | Overall risk of bias | Region   | Industry sponsored | Total participants began | Main population | Allergy severity | Raw or cooked | Duration in weeks, inc maintenance | Comparator  |
|------------------------------------|--------------|--------------|----------------------|----------|--------------------|--------------------------|-----------------|------------------|---------------|------------------------------------|-------------|
| Akashi 2017                        | Egg          | Oral         | Moderate             | Asia     | Yes                | 36                       | Children        | Mild / moderate  | Raw           | 27                                 | Elimination |
| Anagnostou 2014                    | Peanut       | Oral         | Moderate             | Europe   | No                 | 99                       | Children        | Mixed            | Roasted       | 27                                 | Elimination |
| Bird 2018                          | Peanut       | Oral         | Low                  | USA      | Yes                | 55                       | Mixed           | Moderate         | Roasted       | 24                                 | Placebo     |
| Blumchen 2019 / Trendelenburg 2020 | Peanut       | Oral         | Low                  | Europe   | No                 | 62                       | Children        | Mixed            | Roasted       | 68                                 | Placebo     |
| Caminiti 2009                      | Milk         | Oral         | High                 | Europe   | No                 | 6                        | Children        | Severe           | Raw           | 18                                 | Placebo     |
| Caminiti 2015                      | Egg          | Oral         | Low                  | Europe   | No                 | 31                       | Children        | Mild / moderate  | Raw           | 16                                 | Placebo     |
| Chinthrajah 2019                   | Peanut       | Oral         | Low                  | USA      | No                 | 120                      | Children        | Mixed            | Roasted       | 156                                | Placebo     |
| Dello Iacono 2013                  | Egg          | Oral         | Moderate             | Europe   | No                 | 20                       | Children        | Severe           | Raw           | 27                                 | Elimination |
| Dupont 2010                        | Milk         | Epicutaneous | Moderate             | Europe   | Yes                | 19                       | Mixed           | Mixed            | Raw           | 12                                 | Placebo     |
| Enrique 2005                       | Hazelnut     | Sublingual   | Moderate             | Europe   | No                 | 23                       | Adults          | Mixed            | Raw           | 11                                 | Placebo     |
| Escudero 2015                      | Egg          | Oral         | Moderate             | Europe   | No                 | 61                       | Children        | Mixed            | Raw           | 13                                 | Elimination |
| Fauquert 2018                      | Peanut       | Oral         | Moderate             | Europe   | No                 | 30                       | Children        | Mixed            | Roasted       | 24                                 | Placebo     |
| Fernández-Rivas 2009               | Peach        | Sublingual   | Moderate             | Europe   | Yes                | 55                       | Adults          | Mixed            | Raw           | 29                                 | Placebo     |
| Fleischer 2013                     | Peanut       | Sublingual   | Low                  | USA      | No                 | 40                       | Adults          | Mild / moderate  | Raw           | 44                                 | Placebo     |
| Fleischer 2019 / DunnGalvin 2021   | Peanut       | Epicutaneous | Low                  | Multiple | Yes                | 356                      | Children        | Mild / moderate  | Raw           | 52                                 | Placebo     |
| Itoh-Nagato 2018                   | Egg          | Oral         | Moderate             | Asia     | No                 | 45                       | Children        | Mixed            | Roasted       | 13                                 | Elimination |
| Jones 2017                         | Peanut       | Epicutaneous | Low                  | USA      | Yes                | 74                       | Mixed           | Mild / moderate  | Raw           | 52                                 | Placebo     |
| Keet 2012                          | Milk         | OIT vs SLIT  | Moderate             | USA      | No                 | 30                       | Children        | Mixed            | Raw           | 80                                 | OIT vs SLIT |
| Lee 2013                           | Milk         | Oral         | High                 | Asia     | No                 | 31                       | Infants         | Mixed            | Raw           | 27                                 | Elimination |
| Longo 2008                         | Milk         | Oral         | Moderate             | Europe   | Not reported       | 60                       | Children        | Severe           | Raw           | 52                                 | Elimination |
| Martín-Muñoz 2019                  | Egg          | Oral         | Moderate             | Europe   | No                 | 101                      | Children        | Mixed            | Raw           | 52                                 | Elimination |
| Martorell 2011                     | Milk         | Oral         | High                 | Europe   | Not reported       | 60                       | Infants         | Mild / moderate  | Raw           | 52                                 | Elimination |

| Study              | Allergy type | Admin route       | Overall risk of bias | Region   | Industry sponsored | Total participants began | Main population | Allergy severity | Raw or cooked | Duration in weeks, inc maintenance     | Comparator  |
|--------------------|--------------|-------------------|----------------------|----------|--------------------|--------------------------|-----------------|------------------|---------------|----------------------------------------|-------------|
| Morisset 2007      | Milk         | Oral              | High                 | Europe   | Not reported       | 42                       | Mixed           | Mild / moderate  | Raw           | 13                                     | Elimination |
| Narisety 2015      | Peanut       | OIT vs SLIT       | Moderate             | USA      | No                 | 21                       | Mixed           | Mild / moderate  | Raw           | 52                                     | OIT vs SLIT |
| Nowak-Węgrzyn 2019 | Wheat        | Oral              | Moderate             | USA      | Yes                | 46                       | Mixed           | Mild / moderate  | Raw           | 52                                     | Placebo     |
| O'B Hourihane 2020 | Peanut       | Oral              | Low                  | Europe   | Yes                | 175                      | Children        | Mixed            | Raw           | 40                                     | Placebo     |
| Oppenheimer 1992   | Peanut       | Subcutaneous      | High                 | USA      | No                 | 8                        | Mixed           | Severe           | Raw           | 5                                      | Placebo     |
| Pajno 2010         | Milk         | Oral              | Moderate             | Europe   | No                 | 30                       | Children        | Mixed            | Raw           | 18                                     | Placebo     |
| Patriarca 1998     | Multiple     | Oral              | High                 | Europe   | Not reported       | 24                       | Children        | Mixed            | Raw           | 27                                     | Elimination |
| Pérez-Rangel 2017  | Egg          | Oral              | High                 | Europe   | Yes                | 33                       | Children        | Mild / moderate  | Raw           | 23                                     | Elimination |
| Salmivesi 2013     | Milk         | Oral              | High                 | Europe   | No                 | 28                       | Children        | Mixed            | Raw           | 23                                     | Placebo     |
| Sampson 2017       | Peanut       | Epicutaneous      | Low                  | Multiple | Yes                | 221                      | Mixed           | Mixed            | Raw           | 52                                     | Placebo     |
| Skripak 2008       | Milk         | Oral              | Moderate             | USA      | No                 | 20                       | Children        | Mild / moderate  | Raw           | 23                                     | Placebo     |
| Staden 2007        | Multiple     | Oral              | Moderate             | Europe   | No                 | 45                       | Children        | Mild / moderate  | Raw           | 72                                     | Elimination |
| Takahasi 2017      | Milk         | Oral + omalizumab | High                 | Japan    | No                 | 16                       | Children        | Severe           | Cooked        | 8 weeks omalizumab first then 16 weeks | Elimination |
| Vickery 2018       | Peanut       | Oral              | Low                  | Multiple | Yes                | 555                      | Children        | Mixed            | Roasted       | 52                                     | Placebo     |

**TABLE S3.7: SUMMARY OF RISK OF BIAS**

**Risk of bias assessment – peanut**

| Citation         | Randomization process risk of bias | Risk of bias due to assignment | Risk of bias due to missing outcome data | Risk of bias due to outcome measurement | Risk of bias due to selective reporting | Overall risk of bias |
|------------------|------------------------------------|--------------------------------|------------------------------------------|-----------------------------------------|-----------------------------------------|----------------------|
| Anagnostou 2014  | Low                                | Low                            | Moderate/High                            | Moderate                                | Low                                     | Moderate             |
| Bird 2018        | Low                                | Low                            | Low                                      | Low                                     | Low                                     | Low                  |
| Blumchen 2019    | Low                                | Low                            | Low                                      | Low                                     | Low                                     | Low                  |
| Chinthrajah 2019 | Low                                | Low                            | Low                                      | Low                                     | Low                                     | Low                  |
| Fauquet 2018     | Low                                | Low                            | Low                                      | Moderate                                | Low                                     | Moderate             |
| Fleischer 2013   | Low                                | Low                            | Low                                      | Low                                     | Unclear                                 | Low                  |
| Fleischer 2019   | Low                                | Low                            | Low                                      | Low                                     | Low                                     | Low                  |
| Jones 2017       | Low                                | Low                            | Low                                      | Low                                     | Low                                     | Low                  |
| Hourihane 2020   | Low                                | Low                            | Low                                      | Low                                     | Low                                     | Low                  |
| Oppenheimer 1992 | Low                                | High                           | High                                     | High                                    | High                                    | High                 |
| Sampson 2017.    | Low                                | Low                            | Low                                      | Low                                     | Low                                     | Low                  |
| Vickery 2018.    | Low                                | Low                            | Low                                      | Low                                     | Low                                     | Low                  |

**Risk of bias assessment - cow's milk**

| Citation       | Randomization process risk of bias | Risk of bias due to assignment | Risk of bias due to missing outcome data | Risk of bias due to outcome measurement | Risk of bias due to selective reporting | Overall risk of bias |
|----------------|------------------------------------|--------------------------------|------------------------------------------|-----------------------------------------|-----------------------------------------|----------------------|
| Caminiti 2015  | Low                                | Low                            | Low                                      | Low                                     | Low                                     | Low                  |
| Dupont 2010    | Unclear                            | Low                            | Low                                      | Moderate                                | Low                                     | Moderate             |
| Lee 2013       | Unclear                            | Moderate                       | Moderate                                 | High                                    | Unclear                                 | High                 |
| Longo 2008     | Low                                | Moderate                       | Low                                      | Moderate                                | Unclear                                 | Moderate             |
| Martorell 2011 | Low                                | Moderate                       | Low                                      | High                                    | Moderate                                | High                 |
| Morisset 2007  | Low                                | High                           | Moderate                                 | Moderate                                | Moderate                                | High                 |
| Pajno 2010     | Low                                | Moderate                       | Low                                      | Moderate                                | Moderate                                | Moderate             |
| Salmivesi 2013 | Unclear                            | Low                            | Moderate                                 | High                                    | Unclear                                 | High                 |
| Skripak 2008   | Unclear                            | Low                            | Moderate                                 | Moderate                                | Unclear                                 | Moderate             |



### Risk of bias assessment - hen's egg

| Citation          | Randomization process risk of bias | Risk of bias due to assignment | Risk of bias due to missing outcome data | Risk of bias due to outcome measurement | Risk of bias due to selective reporting | Overall risk of bias |
|-------------------|------------------------------------|--------------------------------|------------------------------------------|-----------------------------------------|-----------------------------------------|----------------------|
| Akashi 2017       | Low                                | Low                            | Moderate                                 | Moderate                                | Low                                     | Moderate             |
| Caminiti 2009     | Unclear                            | Low                            | High                                     | High                                    | Moderate                                | High                 |
| Dello Iacono 2013 | Low                                | Moderate                       | Low                                      | Moderate                                | Low                                     | Moderate             |
| Escudero 2015     | Low                                | Low                            | Low                                      | Moderate                                | Unclear                                 | Moderate             |
| Itoh-Nagato 2018  | Low                                | Moderate                       | Low                                      | Moderate                                | Moderate                                | Moderate             |
| Martín-Muñoz 2019 | Low                                | Low                            | Moderate                                 | Moderate                                | Moderate                                | Moderate             |
| Pérez-Rangel 2017 | Low                                | Moderate                       | Low                                      | High                                    | Low                                     | High                 |

### Risk of bias assessment - other allergens

| Citation             | Randomization process risk of bias | Risk of bias due to assignment | Risk of bias due to missing outcome data | Risk of bias due to outcome measurement | Risk of bias due to selective reporting | Overall risk of bias |
|----------------------|------------------------------------|--------------------------------|------------------------------------------|-----------------------------------------|-----------------------------------------|----------------------|
| Enrique 2005         | Unclear                            | Low                            | Low                                      | Moderate                                | Moderate                                | Moderate             |
| Patriarca 1998       | Moderate                           | High                           | Low                                      | High                                    | Moderate                                | High                 |
| Staden 2007          | Unclear                            | Moderate                       | Moderate                                 | Moderate                                | Low                                     | Moderate             |
| Fernández-Rivas 2009 | Low                                | Low                            | Moderate                                 | Moderate                                | Moderate                                | Moderate             |
| Nowak-Węgrzyn 2019   | Unclear                            | Low                            | Low                                      | Moderate                                | Low                                     | Moderate             |

### Risk of bias assessment – direct comparison of administration routes

| Citation      | Randomization process risk of bias | Risk of bias due to assignment | Risk of bias due to missing outcome data | Risk of bias due to outcome measurement | Risk of bias due to selective reporting | Overall risk of bias |
|---------------|------------------------------------|--------------------------------|------------------------------------------|-----------------------------------------|-----------------------------------------|----------------------|
| Keet 2012     | Low                                | Moderate                       | Low                                      | Low                                     | Unclear                                 | Moderate             |
| Narisety 2015 | Unclear                            | Low                            | Low                                      | Moderate                                | Moderate                                | Moderate             |

### Risk of bias assessment - immunotherapy plus biological

| Citation       | Randomization process risk of bias | Risk of bias due to assignment | Risk of bias due to missing outcome data | Risk of bias due to outcome measurement | Risk of bias due to selective reporting | Overall risk of bias |
|----------------|------------------------------------|--------------------------------|------------------------------------------|-----------------------------------------|-----------------------------------------|----------------------|
| Takahashi 2017 | Low                                | Moderate                       | Low                                      | High                                    | Moderate                                | High                 |

**TABLE S3.8: REASONS WHY STUDIES SCREENED AS FULL TEXT WERE EXCLUDED**

Note: many other studies were excluded based on titles and abstracts and these are not listed here.

| Study                                                                                                                                                                                                                                                                                                                                                                                                              | Reason not eligible for inclusion                                                                                                                                                                                                                                                                                                                                                                                                                                                             |
|--------------------------------------------------------------------------------------------------------------------------------------------------------------------------------------------------------------------------------------------------------------------------------------------------------------------------------------------------------------------------------------------------------------------|-----------------------------------------------------------------------------------------------------------------------------------------------------------------------------------------------------------------------------------------------------------------------------------------------------------------------------------------------------------------------------------------------------------------------------------------------------------------------------------------------|
| Burks AW, Jones SM, Wood RA, Fleischer DM, Sicherer SH, Lindblad RW, Stablein D, Henning AK, Vickery BP, Liu AH, Scurlock AM, Shreffler WG, Plaut M, Sampson HA. Oral immunotherapy for treatment of egg allergy in children. <i>N Engl J Med</i> 2012;367(3):233-43.                                                                                                                                              | No baseline food challenge. Eligibility determined based on clinical history of egg allergy and a serum egg-specific IgE.                                                                                                                                                                                                                                                                                                                                                                     |
| Fuentes-Aparicio V, Alvarez-Perea A, Infante S, Zapatero L, D'Oleo A, Alonso-Lebrero E. Specific oral tolerance induction in paediatric patients with persistent egg allergy. <i>Allergol Immunopathol</i> 2013;41(3):143-50.                                                                                                                                                                                      | Baseline challenge only performed on those who had not suffered clinical episodes within the previous 3 months. In intervention group baseline open challenge performed in 27/40. In control group open challenge performed at baseline in all. No follow up challenge reported with control group. 21.8% of controls developed spontaneous tolerance to egg vs 92.5% tolerance in intervention group ( $p < 0.0001$ ). Includes data on adverse events for intervention group, not controls. |
| García BE, González-Mancebo E, Barber D, Martín S, Tabar AI, Díaz de Durana AM, Garrido-Fernández S, Salcedo G, Rico P, Fernández-Rivas M. Sublingual immunotherapy in peach allergy: monitoring molecular sensitizations and reactivity to apple fruit and Platanus pollen. <i>J Investig Allergol Clin Immunol</i> 2010;20(6):514-20.                                                                            | Does not include outcomes of interest to the review. Explores skin reactivity using skin prick tests. No follow up food challenge                                                                                                                                                                                                                                                                                                                                                             |
| Giavi S, Vissers YM, Muraro A, Lauener R, Konstantinopoulos AP, Mercenier A, Wermeille A, Lazzarotto F, Frei R, Bonaguro R, Summermatter S, Nutten S, Papadopoulos NG. Oral immunotherapy with low allergenic hydrolyzed egg in egg allergic children. <i>Allergy</i> 2016;71(11):1575-1584.                                                                                                                       | Baseline challenge not performed in all.                                                                                                                                                                                                                                                                                                                                                                                                                                                      |
| Jones SM, Agbotounou WK, Fleischer DM, Burks AW, Pesek RD, Harris MW, Martin L, Thebault C, Ruban C, Benhamou PH. Safety of epicutaneous immunotherapy for the treatment of peanut allergy: A phase 1 study using the Viaskin patch. <i>J Allergy Clin Immunol</i> 2016;137(4):1258-1261.e10.                                                                                                                      | No baseline food challenge.                                                                                                                                                                                                                                                                                                                                                                                                                                                                   |
| MacGinnitie AJ, Rachid R, Gragg H, Little SV, Lakin P, Cianferoni A, Heimall J, Makhija M, Robison R, Chinthrajah RS, Lee J, Lebovidge J, Dominguez T, Rooney C, Lewis MO, Koss J, Burke-Roberts E, Chin K, Logvinenko T, Pongracic JA, Umetsu DT, Spergel J, Nadeau KC, Schneider LC. Omalizumab facilitates rapid oral desensitization for peanut allergy. <i>J Allergy Clin Immunol</i> 2017;139(3):873-881.e8. | All receive immunotherapy. Randomization is between omalizumab and placebo.                                                                                                                                                                                                                                                                                                                                                                                                                   |

| Study                                                                                                                                                                                                                                                                                                                                                                                                                                                                                                                                            | Reason not eligible for inclusion                                                                                                                                                                                                              |
|--------------------------------------------------------------------------------------------------------------------------------------------------------------------------------------------------------------------------------------------------------------------------------------------------------------------------------------------------------------------------------------------------------------------------------------------------------------------------------------------------------------------------------------------------|------------------------------------------------------------------------------------------------------------------------------------------------------------------------------------------------------------------------------------------------|
| Meglio P, Giampietro PG, Carello R, Gabriele I, Avitabile S, Galli E. Oral food desensitization in children with IgE-mediated hen's egg allergy: a new protocol with raw hen's egg. <i>Pediatr Allergy Immunol</i> 2013;24(1):75-83.                                                                                                                                                                                                                                                                                                             | Oral challenge OR convincing history were inclusion criteria. 3/20 were included based on history, not challenge.                                                                                                                              |
| <p>Reier-Nilsen T, Carlsen KCL, Michelsen MM, Drottning S, Carlsen KH, Zhang C, Borres MP, Håland G. Parent and child perception of quality of life in a randomized controlled peanut oral immunotherapy trial. <i>Pediatr Allergy Immunol</i> 2019;30(6):638-645.</p> <p>AND</p> <p>Reier-Nilsen T, Michelsen MM, Lodrup Carlsen KC, Carlsen K-H, Mowinckel P, Nygaard UC, Namork E, Borres MP, Håland G. Feasibility of desensitizing children highly allergic to peanut by high-dose oral immunotherapy. <i>Allergy</i> 2019; 74: 337–48.</p> | No outcomes in these papers relevant to the review. Measures quality of life but not with the tool listed as required in review protocol. Measured with the PedsQL 4.0. Adverse events reported for intervention group only / no control data. |
| Palosuo K, Karisola P, Savinko T, Fyhrquist N, Alenius H, Mäkelä MJ. A randomized, open-label trial of hen's egg oral immunotherapy: efficacy and humoral immune responses in 50 children. <i>J Allergy Clin Immunol Pract</i> (Published online ahead of print January 2021).                                                                                                                                                                                                                                                                   | Compares 6 months of avoidance with 8 months of immunotherapy. However 8 months immunotherapy group also includes avoidance for 6 months then starting immunotherapy. No direct comparison between avoidance and immunotherapy.                |
| Varshney P, Jones SM, Scurlock AM, Perry TT, Kemper A, Steele P, Hiegel A, Kamilaris J, Carlisle S, Yue X, Kulis M, Pons L, Vickery B, Burks AW. A randomized controlled study of peanut oral immunotherapy: clinical desensitization and modulation of the allergic response. <i>J Allergy Clin Immunol</i> 2011;127(3):654-60.                                                                                                                                                                                                                 | No challenge at baseline, only skin prick test.                                                                                                                                                                                                |
| Wood RA, Kim JS, Lindblad R, Nadeau K, Henning AK, Dawson P, Plaut M, Sampson HA. A randomized, double-blind, placebo-controlled study of omalizumab combined with oral immunotherapy for the treatment of cow's milk allergy. <i>J Allergy Clin Immunol</i> 2016;137(4):1103-1110.e11.                                                                                                                                                                                                                                                          | All receive immunotherapy. Randomization is between omalizumab and placebo.                                                                                                                                                                    |

## Online supplement 4: biological therapies

This supplement provides evidence in support of our conclusions about biological therapies. The first tables summarise our reasoning. This is followed by details about the studies we included in drawing our conclusions.

**TABLE S4.1: RECOMMENDATION JUSTIFICATION FOR OMALIZUMAB**

The GA<sup>2</sup>LEN Task Force makes no recommendation for or against offering omalizumab for treating food allergy.

| Intervention           | Evidence of effectiveness                                                                                                                                                                                                                                                                                                                                                                       | Benefits versus harms                                                                                                                                                                                                                                                                                                                                                                                                                                                                                                                                                                                                                    | Patient/care giver values                                                                   | Feasibility and cost issues                                                                                                                                                                                                                                                                                                                                                                                                                                                                                                                                                                                                                                           |
|------------------------|-------------------------------------------------------------------------------------------------------------------------------------------------------------------------------------------------------------------------------------------------------------------------------------------------------------------------------------------------------------------------------------------------|------------------------------------------------------------------------------------------------------------------------------------------------------------------------------------------------------------------------------------------------------------------------------------------------------------------------------------------------------------------------------------------------------------------------------------------------------------------------------------------------------------------------------------------------------------------------------------------------------------------------------------------|---------------------------------------------------------------------------------------------|-----------------------------------------------------------------------------------------------------------------------------------------------------------------------------------------------------------------------------------------------------------------------------------------------------------------------------------------------------------------------------------------------------------------------------------------------------------------------------------------------------------------------------------------------------------------------------------------------------------------------------------------------------------------------|
| Omalizumab monotherapy | <p>There is very low certainty evidence about the effectiveness of omalizumab monotherapy. Therefore, we cannot recommend for or against this as a routine treatment option for people with food allergy.</p> <p>1 one very small trial found no statistically significant difference in peanut tolerance amongst adults with peanut allergy, but there were positive trends.<sup>129</sup></p> | <p>There is insufficient information to weigh up benefits versus potential harms.</p> <p>In the one trial that met our inclusion criteria, omalizumab was well tolerated.</p> <p>Other observational studies and descriptive reviews suggests improved tolerance and quality of life so it is possible that benefits outweigh harms.<sup>130,131</sup></p> <p>Clinicians may wish to consider whether individuals would benefit with omalizumab as a specialist treatment. However, based on controlled trials, there is not yet enough certainty of evidence to say that omalizumab should be universally considered at this stage.</p> | <p>We have no information about the views of people with food allergy about omalizumab.</p> | <p>There is no robust evidence about the feasibility or cost effectiveness of omalizumab for food allergy. Similarly to other monoclonal antibodies, omalizumab may more likely to provide value for money for people with severe food allergy at high risk of anaphylaxis.</p> <p>Many people have multiple allergic manifestations. Omalizumab is already licensed for treating severe asthma. The potential added benefit for food allergy may be a consideration when deciding whether or not to commence someone with asthma on a biological therapy. A higher affinity monoclonal anti-IgE therapy (Ligelizumab) is now being investigated for food allergy</p> |

**TABLE S4.2: RECOMMENDATION JUSTIFICATION FOR ETOKIMAB**

The GA<sup>2</sup>LEN Task Force makes no recommendation for or against offering etokimab for treating food allergy.

| Intervention         | Evidence of effectiveness                                                                                                                                                                                                                                                                                                                                                               | Benefits versus harms                                                                                                                                     | Patient/care giver values                                                                                 | Feasibility and cost issues                                                                                                                                                                                                                                                                                                                                                                                                                                                                                                                                                                                                                                                                  |
|----------------------|-----------------------------------------------------------------------------------------------------------------------------------------------------------------------------------------------------------------------------------------------------------------------------------------------------------------------------------------------------------------------------------------|-----------------------------------------------------------------------------------------------------------------------------------------------------------|-----------------------------------------------------------------------------------------------------------|----------------------------------------------------------------------------------------------------------------------------------------------------------------------------------------------------------------------------------------------------------------------------------------------------------------------------------------------------------------------------------------------------------------------------------------------------------------------------------------------------------------------------------------------------------------------------------------------------------------------------------------------------------------------------------------------|
| Etokimab monotherapy | <p>There is very low certainty evidence about the effectiveness of etokimab monotherapy. Therefore, we cannot recommend for or against this as a routine treatment option for people with food allergy.</p> <p>1 one small trial found a trend towards improved tolerance of peanut amongst adults with peanut allergy who had a single dose of intravenous etokimab.<sup>132</sup></p> | <p>There is insufficient information to weigh up benefits versus potential harms.</p> <p>In the one trial we identified, etokimab was well tolerated.</p> | <p>We have no information about people with food allergy and their care givers' views about etokimab.</p> | <p>There is no robust evidence about the feasibility or cost effectiveness of etokimab. Similarly to other monoclonal antibodies, etokimab may more likely to provide value for money for people with severe food allergy at high risk of anaphylaxis.</p> <p>Clinicians may wish to consider whether individuals would benefit with etokimab as a specialist treatment. However, based on controlled trials, there is not yet enough certainty of evidence to say that etokimab should be universally considered at this stage. Large randomized trials with standardised measures are needed to determine efficacy and the most suitable candidates, doses and durations of treatment.</p> |

**TABLE S4.3: RECOMMENDATION JUSTIFICATION FOR OTHER BIOLOGICAL MONOTHERAPY**

The GA<sup>2</sup>LEN Task Force makes no recommendation for or against offering TNX-901 to patients with food allergy and as this therapy is not available, we do not mention it in the guideline

| Intervention        | Evidence of effectiveness                                                                                                                                                                                                                                                                                                                                                                                 | Benefits versus harms                                                          | Patient/care giver values                                                           | Feasibility and cost issues                                                                                                                                                                                                                                              |
|---------------------|-----------------------------------------------------------------------------------------------------------------------------------------------------------------------------------------------------------------------------------------------------------------------------------------------------------------------------------------------------------------------------------------------------------|--------------------------------------------------------------------------------|-------------------------------------------------------------------------------------|--------------------------------------------------------------------------------------------------------------------------------------------------------------------------------------------------------------------------------------------------------------------------|
| TNX-901 monotherapy | <p>There is very low certainty evidence about the effectiveness of TNX-901 therapy and this drug has been withdrawn from development. Therefore, we cannot recommend for or against this as a routine treatment option for people with food allergy.</p> <p>1 trial found that TNX-901 (monoclonal anti-IgE therapy) did not increase the proportion of adults able to tolerate peanut.<sup>133</sup></p> | There is insufficient information to weigh up benefits versus potential harms. | We have no information about people with food allergy and their care givers' views. | <p>This therapy was an experimental molecule which is not being further developed for the pharmaceutical market so we do not cover it in the guideline.</p> <p>New monoclonal antibodies with higher affinity to free circulating serum IgE are currently available.</p> |

**TABLE S4.4: NUMBER OF STUDIES SCREENED, INCLUDED AND EXCLUDED**

|                                                                         |        |
|-------------------------------------------------------------------------|--------|
| Number of potential studies identified by database searches             | 4,560  |
| Number of additional potential studies identified through other sources | 24     |
| Total number of studies screened once duplicates were removed           | 4,574  |
| Number of studies shortlisted for full text review                      | 5      |
| Number of studies excluded after full text review                       | 2      |
| Number and type of studies included                                     | 3 RCTs |

Note: see the end of this supplement for a list of the studies we excluded after screening the full text.

**TABLE S4.5: DETAILS OF STUDIES INCLUDED**

| Citation         | Study type | Risk of bias | Country | Funding source            | Total participants | Age                                                                                       | Allergy type | Severity of allergy                | Biological tested                                        | Biological dose and duration                                                                                                                                                                                                                       | Comparator |
|------------------|------------|--------------|---------|---------------------------|--------------------|-------------------------------------------------------------------------------------------|--------------|------------------------------------|----------------------------------------------------------|----------------------------------------------------------------------------------------------------------------------------------------------------------------------------------------------------------------------------------------------------|------------|
| Chinthrajah 2019 | RCT        | Moderate     | USA     | Industry and non industry | 20                 | Adults. Median age (range): intervention 27 years (19 to 54); placebo 22 years (18 to 50) | Peanut       | Not specified<br>Appears moderate. | Etokimab                                                 | Single dose of etokimab, 300mg/100 mL i.v.                                                                                                                                                                                                         | Placebo    |
| Leung 2003       | RCT        | Low          | USA     | Industry and non industry | 84                 | 13+ years<br><br>Eligible: 12 to 60 years, included 13 to 59                              | Peanut       | Moderate to severe                 | TNX-901 (humanized IgG1 monoclonal antibody against IgE) | 150mg, 300mg, or 450mg of TNX-901 subcutaneously every 4 weeks for 4 doses.                                                                                                                                                                        | Placebo    |
| Sampson 2011     | RCT        | Moderate     | USA     | Industry                  | 14                 | Mixed 5 to 12 (50%) and 13+ years (50%)<br><br>Range 6 to 75 years                        | Peanut       | Not specified                      | Omalizumab                                               | Dose based on total IgE levels and body weight. Treatment was 20 to 22 weeks every 2 to 4 weeks. Dose was a minimum of 0.016 mg/kg/IgE (IU/mL) every 4 weeks. Those requiring more than a 300mg dose had the dose divided and given every 2 weeks. | Placebo    |

**TABLE S4.6: SUMMARY OF RISK OF BIAS**

| Study            | Randomization process risk of bias | Risk of bias due to assignment | Risk of bias due to missing outcome data | Risk of bias due to outcome measurement | Risk of bias due to reported results | Overall risk of bias |
|------------------|------------------------------------|--------------------------------|------------------------------------------|-----------------------------------------|--------------------------------------|----------------------|
| Chinthrajah 2019 | Unclear                            | Low                            | Moderate                                 | Moderate                                | Moderate                             | Moderate             |
| Leung 2003       | Low                                | Low                            | Low                                      | Low                                     | Low                                  | Low                  |
| Sampson 2011     | Unclear                            | Low                            | High                                     | Low                                     | Low                                  | Moderate             |

**TABLE S4.7: REASONS WHY STUDIES SCREENED AS FULL TEXT WERE EXCLUDED**

| Study        | Reason not eligible      |
|--------------|--------------------------|
| Cavagni 1989 | Not biological therapy   |
| Leung 2004   | Same study as Leung 2003 |



## Online supplement 5: educating individuals with food allergy and families

**TABLE S5.1: JUSTIFICATION OF BEST PRACTICE STATEMENT ABOUT EDUCATION**

**It is good practice to offer structured education to people with food allergy and their family about managing food allergy routinely and in an emergency, tailored to their age group and individual needs.**

| Intervention                                                 | Evidence of effectiveness                                                                                                                                                                                                                                                                                                                                                                                                                                                                                                                                                                                                                                                                                                      | Benefits versus harms                                                                                                                                                                                                                                                                                                                                                                                                                                                                                                                                                                                                                                                                                                                                         | Patient / care giver values                                                                                                                                                                                                                                                                                                                                                                                                                                                                                                                                                                                                                                                      | Feasibility and cost                                                                                                                                                                                                                                                                                                                                                                                                                                                    |
|--------------------------------------------------------------|--------------------------------------------------------------------------------------------------------------------------------------------------------------------------------------------------------------------------------------------------------------------------------------------------------------------------------------------------------------------------------------------------------------------------------------------------------------------------------------------------------------------------------------------------------------------------------------------------------------------------------------------------------------------------------------------------------------------------------|---------------------------------------------------------------------------------------------------------------------------------------------------------------------------------------------------------------------------------------------------------------------------------------------------------------------------------------------------------------------------------------------------------------------------------------------------------------------------------------------------------------------------------------------------------------------------------------------------------------------------------------------------------------------------------------------------------------------------------------------------------------|----------------------------------------------------------------------------------------------------------------------------------------------------------------------------------------------------------------------------------------------------------------------------------------------------------------------------------------------------------------------------------------------------------------------------------------------------------------------------------------------------------------------------------------------------------------------------------------------------------------------------------------------------------------------------------|-------------------------------------------------------------------------------------------------------------------------------------------------------------------------------------------------------------------------------------------------------------------------------------------------------------------------------------------------------------------------------------------------------------------------------------------------------------------------|
| Written information                                          | <p>We found insufficient evidence to draw conclusions about providing written information for people with food allergy. The certainty of evidence was very low.</p> <p>1 trial (n = 75) found that providing written dietary advice to children with nut allergy did not change their behavior or improve quality of life.<sup>134</sup></p>                                                                                                                                                                                                                                                                                                                                                                                   | <p>We found limited robust evidence to help weigh up the evidence of the benefits versus potential harms of education for people with food allergy and their family members.</p> <p>Observational studies and reviews not eligible for inclusion in our rapid review suggest the potential for improved knowledge and reduced anxiety from some forms of education about managing food allergy.<sup>140,141</sup></p>                                                                                                                                                                                                                                                                                                                                         | <p>People with food allergy and care givers often identify gaps in their knowledge about managing food allergy<sup>146,147</sup> and welcome education from professionals as they otherwise rely on information from friends and family or unofficial online sources.<sup>148,149</sup></p> <p>The most appropriate education will depend on the person's age, context and individual needs. For instance some may value taking part in group education sessions whereas others may prefer a structured online program or mobile phone app. It would likely be useful to have a range of education options available to address individual preferences and ways of learning.</p> | <p>It is feasible and need not be costly to provide all with some form of education tailored to their individual needs and stage of life.</p>                                                                                                                                                                                                                                                                                                                           |
| Education using psychological / behavioral change principles | <p>We found insufficient evidence to draw conclusions about education using psychological, motivational or behavioral change principles. The certainty of evidence was very low.</p> <p>1 trial (n = 200) of a single-session of cognitive behavioral therapy with communication about risks did not reduce anxiety in mothers of children with food allergy, but a subgroup with the highest initial anxiety had improvements at 6 weeks.<sup>135</sup></p> <p>1 trial (n = 50) found that describing potential non-life-threatening 'symptoms' of oral immunotherapy in positive terms rather than as negative side effects reduced anxiety and increased compliance amongst children with peanut allergy.<sup>136</sup></p> | <p>In children and adults with other conditions, education that incorporates psychological, motivational or behavioral change concepts has been found to reduce anxiety and improve people's confidence to self-manage<sup>142,143</sup> but there is limited evidence about these types of interventions for people with food allergy.</p> <p>There may be some risk of harm from education such as the potential to increase anxiety if information is not provided with appropriate support or phrased in a sensitive manner. There is also a small risk of over-confidence leading to a potential risk of inappropriate exposure to food allergens. Online resources and mobile apps that people access may not be quality assured.<sup>144,145</sup></p> | <p>The most appropriate education will depend on the person's age, context and individual needs. For instance some may value taking part in group education sessions whereas others may prefer a structured online program or mobile phone app. It would likely be useful to have a range of education options available to address individual preferences and ways of learning.</p>                                                                                                                                                                                                                                                                                             | <p>Education with psychological components need not be delivered by clinical psychologists. Motivational and behavior change principles can be used by a wide range of professionals, after minimal training.<sup>150</sup></p> <p>Observational studies and reviews not eligible for inclusion in our rapid review highlight gaps in non-specialist clinicians' and teachers' knowledge about how to educate people about managing food allergy.<sup>151-154</sup></p> |
| Group education                                              | <p>We found insufficient evidence to draw conclusions about group education for people with food allergy. The certainty of evidence was very low.</p> <p>1 trial of two 3-hour training sessions for adults with severe food allergy and care givers of children with severe food allergy found improved knowledge and</p>                                                                                                                                                                                                                                                                                                                                                                                                     | <p>On balance it is likely that the benefits of person-centered tailored education outweigh</p>                                                                                                                                                                                                                                                                                                                                                                                                                                                                                                                                                                                                                                                               | <p>The most appropriate education will depend on the person's age, context and individual needs. For instance some may value taking part in group education sessions whereas others may prefer a structured online program or mobile phone app. It would likely be useful to have a range of education options available to address individual preferences and ways of learning.</p>                                                                                                                                                                                                                                                                                             | <p>Observational studies and reviews not eligible for inclusion in our rapid review highlight gaps in non-specialist clinicians' and teachers' knowledge about how to educate people about managing food allergy.<sup>151-154</sup></p>                                                                                                                                                                                                                                 |

| Intervention                             | Evidence of effectiveness                                                                                                                                                                                                                                                                                                                                                                                                                                                                                                                                                                                                              | Benefits versus harms                                                                       | Patient / care giver values | Feasibility and cost |
|------------------------------------------|----------------------------------------------------------------------------------------------------------------------------------------------------------------------------------------------------------------------------------------------------------------------------------------------------------------------------------------------------------------------------------------------------------------------------------------------------------------------------------------------------------------------------------------------------------------------------------------------------------------------------------------|---------------------------------------------------------------------------------------------|-----------------------------|----------------------|
|                                          | competence in managing anaphylaxis (n = 92 with food allergy or family members). <sup>137</sup>                                                                                                                                                                                                                                                                                                                                                                                                                                                                                                                                        | the risks, but there is not enough evidence to recommend one form of education over others. |                             |                      |
| Education including practical components | <p>We found insufficient evidence to draw conclusions about practical education strategies for people with food allergy. The certainty of evidence was very low.</p> <p>1 trial (n = 60) found that adolescents with peanut allergy and their care givers felt more comfortable with adrenaline autoinjectors after supervised practice, but there were no significant improvements in anxiety or quality of life.<sup>138</sup></p> <p>1 trial (n = 60) found that encouraging children to hold nuts that they were not allergic to did not reduce anxiety or improve quality of life in children with nut allergy.<sup>139</sup></p> |                                                                                             |                             |                      |

**TABLE S5.2: NUMBER OF STUDIES SCREENED, INCLUDED AND EXCLUDED**

|                                                                         |        |
|-------------------------------------------------------------------------|--------|
| Number of potential studies identified by database searches             | 1,401  |
| Number of additional potential studies identified through other sources | 3      |
| Total number of studies screened once duplicates were removed           | 1,404  |
| Number of studies shortlisted for full text review                      | 14     |
| Number of studies excluded after full text review                       | 8      |
| Number and type of studies included                                     | 6 RCTS |

Note: see the end of this supplement for a list of the studies we excluded after screening the full text.

**TABLE S5.3: DETAILS OF STUDIES INCLUDED**

| Study           | Study type | Risk of bias | Region      | Funding source | Total participants                                                                           | Age                              | Allergy type     | Severity of allergy | Intervention                                                                                                                                                   | Comparator                                                                                                      |
|-----------------|------------|--------------|-------------|----------------|----------------------------------------------------------------------------------------------|----------------------------------|------------------|---------------------|----------------------------------------------------------------------------------------------------------------------------------------------------------------|-----------------------------------------------------------------------------------------------------------------|
| Boyle 2017      | RCT        | Moderate     | Europe      | Non-industry   | 200 mothers of children with food allergy                                                    | Adults                           | Various          | Mild to severe      | Single-session cognitive behavioral therapy including risk communication                                                                                       | Standard care.                                                                                                  |
| Brockow 2015    | RCT        | Moderate     | Europe      | Non-industry   | 183 total, of which 19 adults with food allergy and 73 parents of children with food allergy | Adults                           | Various          | Severe              | 2 sessions of group education, each 3 hours long                                                                                                               | Standard education about adrenaline autoinjectors                                                               |
| Howe 2019       | RCT        | Moderate     | USA         | Non-industry   | 50                                                                                           | 7 to 17 years                    | Peanut           | Severe              | People with food allergy and their families informed that non-life-threatening symptoms during oral immunotherapy were positive (could signal desensitization) | Informed that non-life-threatening symptoms during oral immunotherapy were negative (side effects of treatment) |
| Norman 2016     | RCT        | Moderate     | Australasia | Not industry   | 75                                                                                           | 2-16 years                       | Nut              | Severe              | Written instructions to eat non-allergic nuts, recipe booklet and monthly reminder text messages                                                               | Standard verbal dietary advice                                                                                  |
| Shemesh 2017    | RCT        | High         | USA         | Non-industry   | 60                                                                                           | 13 to 17 years and their parents | Peanut           | Mild to severe      | Supervised 'practice' injection of needle into thigh                                                                                                           | Standard education about adrenaline autoinjectors                                                               |
| Weinberger 2019 | RCT        | High         | US          | Not stated     | 60                                                                                           | 9 to 17 years                    | Nuts and peanuts | Mild to severe      | Education plus supervised touching of nuts that children were not allergic to                                                                                  | Education alone                                                                                                 |

**TABLE S5.4: RISK OF BIAS ASSESSMENT**

| Study            | Randomization process risk of bias | Risk of bias due to assignment | Risk of bias due to missing outcome data | Risk of bias due to outcome measurement | Risk of bias due to reported results | Overall risk of bias |
|------------------|------------------------------------|--------------------------------|------------------------------------------|-----------------------------------------|--------------------------------------|----------------------|
| Boyle 2017       | Low                                | Low                            | Low                                      | Moderate                                | Low                                  | Moderate             |
| Brockow 2015     | Low                                | Low                            | Low                                      | Moderate                                | Low                                  | Moderate             |
| Howe 2019        | Low                                | Low                            | Low                                      | Moderate                                | Low                                  | Moderate             |
| Norman 2016      | Low                                | Low                            | Moderate                                 | Moderate                                | Low                                  | Moderate             |
| Shemesh 2017     | Low                                | Low                            | High                                     | Moderate                                | Moderate                             | High                 |
| Weinberger 2019. | Unclear                            | Low                            | High                                     | Moderate                                | Low                                  | High                 |

**TABLE S5.5: REASONS WHY STUDIES SCREENED AS FULL TEXT WERE EXCLUDED**

| Study                                                                                                                                                                                                       | Reason not eligible                                                                |
|-------------------------------------------------------------------------------------------------------------------------------------------------------------------------------------------------------------|------------------------------------------------------------------------------------|
| <b>Baptist AP,et al. A self-regulation intervention can improve quality of life for families with food allergy. J Allergy Clin Immunol 2012;130(1):263-5.e6.</b>                                            | Not education                                                                      |
| <b>Fernandez-Mendez F et al Learning and treatment of anaphylaxis by laypeople: a simulation study using pupilar technology. Biomed Res Int 2017;2017:9837508.</b>                                          | Not people with food allergy or family                                             |
| <b>Hernandez-Munoz LU et al. Evaluation of AllergiSense smartphone tools for adrenaline injection training. IEEE J Biomed Health Inform 2017;21(1):272-282.</b>                                             | Not people with food allergy or family                                             |
| <b>LeBovidge JS et al Evaluating a handbook for parents of children with food allergy: a randomized clinical trial. Ann Allergy Asthma Immunol. 2016;116(3):230-236.e1.</b>                                 | Not educational (instructional guide)                                              |
| <b>Sugunasingha N, Jones FW, Jones CJ. Interventions for caregivers of children with food allergy: A systematic review. Pediatr Allergy Immunol 2020;31(7):805-812.</b>                                     | Systematic review - not primary study. No relevant studies included for our review |
| Vazquez-Ortiz M, Understanding the challenges faced by adolescents and young adults with allergic conditions: A systematic review. Allergy 2020;75(8):1850-1880.                                            | Systematic review - not primary study. No relevant studies included for our review |
| Young I, A systematic review and meta-regression of the knowledge, practices, and training of restaurant and food service personnel toward food allergies and Celiac disease. PLoS One 2018;13(9):e0203496. | Systematic review - not primary study. No relevant studies included for our review |

## Online supplement 6: risk identification and management

This supplement provides evidence in support of our conclusions about risk identification and management. The first tables summarize our reasoning. This is followed by details about the studies we included in drawing our conclusions.

**TABLE S6.1: JUSTIFICATION FOR BEST PRACTICE STATEMENT ABOUT ADOLESCENTS**

**Adolescents and young adults with food allergy are at increased risk of severe reactions, so it is good practice to put into place effective risk management and transition strategies.**

| Evidence of impact                                                                                                                                                                                                                                                                                                                                                                                                                                                                                                                                                                                                                                                                                                                                                                                                                                                                                                                                                                                                                                                                  | Benefits versus harms                                                                                                                                                                                                                                                                                                                                                                                                                                                                                                                                                         | Patient / care giver values                                                                                                         | Feasibility and cost                                                                                                                                                                                                   |
|-------------------------------------------------------------------------------------------------------------------------------------------------------------------------------------------------------------------------------------------------------------------------------------------------------------------------------------------------------------------------------------------------------------------------------------------------------------------------------------------------------------------------------------------------------------------------------------------------------------------------------------------------------------------------------------------------------------------------------------------------------------------------------------------------------------------------------------------------------------------------------------------------------------------------------------------------------------------------------------------------------------------------------------------------------------------------------------|-------------------------------------------------------------------------------------------------------------------------------------------------------------------------------------------------------------------------------------------------------------------------------------------------------------------------------------------------------------------------------------------------------------------------------------------------------------------------------------------------------------------------------------------------------------------------------|-------------------------------------------------------------------------------------------------------------------------------------|------------------------------------------------------------------------------------------------------------------------------------------------------------------------------------------------------------------------|
| <p>Teenagers and young adults are at increased risk of severe reactions. Fatality data from France, UK and Australia have indicated these age groups are at higher risk of fatal anaphylaxis, although very low risk overall.<sup>155,156,157</sup> This cannot solely be attributed to risk-taking behavior, suggesting an age-specific vulnerability to severe outcomes from food-induced allergic reactions. There is also evidence of increased risk of ICU admission in teenagers.<sup>158</sup> Data from unintended allergic reactions due to food occurring in the community are also consistent with this age-related risk.<sup>159</sup></p> <p>With respect to food challenges (FC), data are less consistent, with some studies reporting an association between severity and age,<sup>160</sup> but not others,<sup>161</sup> although reaction severity at FC is limited due to the manner in which FC are performed).</p> <p>Many studies do not distinguish between reactions due to food and non-food triggers, which is likely to be an important confounder.</p> | <p>Specific interventions targeting teenagers and young adults are unlikely to be harmful where strategies are intended to increase self-efficacy (confidence in managing food allergy) rather than increase anxiety.</p> <p>However, there is an absence of evidence as to whether such interventions reduce risk of severe reactions. Targeting children and young people as part of transitioning care may be advantageous, although given the resource limitations of most healthcare environments, targeting a specific age group may result in less care to others.</p> | <p>“Transitioning” has been identified as an important area for support, both by young people and their families.<sup>162</sup></p> | <p>Targeting of educational strategies to specific ages may be a more efficient use of limited resources, however this should not be at the expense of education to other individuals at risk of food-anaphylaxis.</p> |

**TABLE S6.2: JUSTIFICATION OF BEST PRACTICE STATEMENT ABOUT ASTHMA MANAGEMENT**

**It is good practice to optimise asthma control in people with food allergy as this reduces morbidity and mortality due to asthma. It *might* reduce the risk of severe food-induced allergic reactions, though the evidence about this is unclear.**

| Evidence of impact                                                                                                                                                                                                                                                                                                                                                                                                                                                                                                                                                                                                                                                                                                                                                                                                                                                                                                                                                                                                                                                                                                                                                         | Benefits versus harms                                                                                                                                                                                                                                                                                                                                                                                                                                   | Patient / care giver values                                                                                                                                                                                                                                      | Feasibility and cost                                                                                                                                                                                                                                            |
|----------------------------------------------------------------------------------------------------------------------------------------------------------------------------------------------------------------------------------------------------------------------------------------------------------------------------------------------------------------------------------------------------------------------------------------------------------------------------------------------------------------------------------------------------------------------------------------------------------------------------------------------------------------------------------------------------------------------------------------------------------------------------------------------------------------------------------------------------------------------------------------------------------------------------------------------------------------------------------------------------------------------------------------------------------------------------------------------------------------------------------------------------------------------------|---------------------------------------------------------------------------------------------------------------------------------------------------------------------------------------------------------------------------------------------------------------------------------------------------------------------------------------------------------------------------------------------------------------------------------------------------------|------------------------------------------------------------------------------------------------------------------------------------------------------------------------------------------------------------------------------------------------------------------|-----------------------------------------------------------------------------------------------------------------------------------------------------------------------------------------------------------------------------------------------------------------|
| <p>Data from fatality registries indicate that while asthma is a common comorbidity (in &gt;80% of fatalities), only in the minority of cases is there evidence of prior, poorly controlled asthma. For non-fatal anaphylaxis, evidence is inconsistent. Some studies report a weak-moderate association between a diagnosis of asthma and<sup>159,163-167</sup> while others do not.<sup>168-172</sup> Data may be inconsistent even within the same datasets,<sup>165,169</sup> depending on how severity is assigned.</p> <p>A systematic review and meta-analysis of 13 studies included only 2 studies specifically on food-induced anaphylaxis. The reviewers found an increase in reaction severity with asthma diagnosis (OR 1.89; 95%CI, 1.26-2.83); however the analysis was limited by medium-high risk of bias, incomplete search strategy and significant study heterogeneity.<sup>173</sup> Most studies in this area are at moderate-high risk of bias and do not assess asthma control at time of reaction.</p> <p>One study found that a diagnosis of asthma does not impact on mortality in children admitted to PICU for anaphylaxis.<sup>158</sup></p> | <p>Data relating to the association between asthma severity, asthma control and severity of food-induced allergic reactions are inconsistent.</p> <p>However, achieving good asthma control in food-allergic patients will reduce morbidity/mortality due to asthma. This is an important outcome which, in turn, may reduce the risk of severe food-induced allergic reactions due to unintended exposure, but the evidence about this is unclear.</p> | <p>Achieving good asthma control is important to individuals with asthma, and is associated with improvements in health-related quality of life, but we cannot say that this has direct impacts on the risk of severe reactions in people with food allergy.</p> | <p>Achieving good asthma control is important and cost-effective as a means to reduce the morbidity and mortality associated with asthma, but we have no evidence about the feasibility and cost of asthma control for addressing severe reactions to food.</p> |

**TABLE S6.3: JUSTIFICATION OF BEST PRACTICE ABOUT PREDICTION**

**It is good practice for clinicians to consider the severity of previous symptoms and the likely triggering dose when evaluating the risk of anaphylaxis, though there is not always a clear relationship. Allergen-specific IgE levels alone are not useful in predicting risk of anaphylaxis.**

| Evidence of impact                                                                                                                                                                                                                                                                                                                                                                                                                                                                                                                                                                                                                                                                                                                                                                                                                                                                                                                                                                                                                                                                                                                                                                                                                                                                                                                                                                                                                                                                                                                                                                                                                                                                                                                                                                                                                                                                                                         | Benefits versus harms                                                                                                                                                                                                                                                                                                                                                                                                                                                                                                                                                                                                                                                                                                                                                                                                                                                                                                                                                                                                                                                                                                               | Patient / care giver values                                                                                                                                                                                                                                                                                                                       | Feasibility and cost                                                                                                                                                                                                                                                                                                                                                                                                                                                                                                                                                                                                                                                                                         |
|----------------------------------------------------------------------------------------------------------------------------------------------------------------------------------------------------------------------------------------------------------------------------------------------------------------------------------------------------------------------------------------------------------------------------------------------------------------------------------------------------------------------------------------------------------------------------------------------------------------------------------------------------------------------------------------------------------------------------------------------------------------------------------------------------------------------------------------------------------------------------------------------------------------------------------------------------------------------------------------------------------------------------------------------------------------------------------------------------------------------------------------------------------------------------------------------------------------------------------------------------------------------------------------------------------------------------------------------------------------------------------------------------------------------------------------------------------------------------------------------------------------------------------------------------------------------------------------------------------------------------------------------------------------------------------------------------------------------------------------------------------------------------------------------------------------------------------------------------------------------------------------------------------------------------|-------------------------------------------------------------------------------------------------------------------------------------------------------------------------------------------------------------------------------------------------------------------------------------------------------------------------------------------------------------------------------------------------------------------------------------------------------------------------------------------------------------------------------------------------------------------------------------------------------------------------------------------------------------------------------------------------------------------------------------------------------------------------------------------------------------------------------------------------------------------------------------------------------------------------------------------------------------------------------------------------------------------------------------------------------------------------------------------------------------------------------------|---------------------------------------------------------------------------------------------------------------------------------------------------------------------------------------------------------------------------------------------------------------------------------------------------------------------------------------------------|--------------------------------------------------------------------------------------------------------------------------------------------------------------------------------------------------------------------------------------------------------------------------------------------------------------------------------------------------------------------------------------------------------------------------------------------------------------------------------------------------------------------------------------------------------------------------------------------------------------------------------------------------------------------------------------------------------------|
| <p>The relationship between dose/level of exposure and severity of food reactions is complex and unclear.<sup>174</sup> However, people with food allergy who experience only mild symptoms to large levels of exposure are probably less likely to have severe reactions to low levels of exposure. There is no evidence that people who react to very low levels of allergen are at greater risk of anaphylaxis.<sup>175</sup></p> <p>A previous review concluded that there are currently no predictors of clinical utility to inform future risk severity.<sup>176</sup> Our rapid review did not identify any evidence to contradict this.</p> <p>Prior history of anaphylaxis implies potential for future anaphylaxis, but level (dose) of exposure is a clear confounder in predicting future risk,<sup>174</sup> which probably explains why prior history of anaphylaxis often does not correspond to anaphylaxis at food challenge.<sup>161,163,170,177</sup> Most fatal food anaphylaxis events occur in people without a prior history of anaphylaxis.<sup>176</sup></p> <p>People with only oral allergy symptoms (OAS) to low levels of exposure cannot be assumed to have pollen food allergy syndrome on that basis alone. OAS is not synonymous with Pollen Food Allergy Syndrome (PFAS). In general, people with PFAS are at lower risk of anaphylaxis,<sup>176</sup> although patients with poly-sensitization may be at greater risk than mono-sensitized individuals.<sup>178</sup></p> <p>There are emerging data about cofactors, although some studies have found no clear impact on severity.<sup>171</sup></p> <p>In general, IgE sensitization does not predict the severity of reactions. For peanut allergy, IgE to Ara h 2 is not predictive of severity.<sup>159,170,179,180</sup> Some studies have concluded that IgE sensitization (skin prick testing, serum IgE to food allergens</p> | <p>Providing false reassurance to individuals with food allergy and their care givers about future risk can be harmful, however clinicians must also provide information that does not overstate risk.</p> <p>Food allergy is associated with issues of trust and miscommunication regarding allergen labelling. It is vital that people are provided with reliable and accurate information by healthcare professionals. Absence of prior anaphylaxis does not exclude future risk of anaphylaxis. However, the vast majority of anaphylaxis reactions are not severe and respond to 1-2 doses of rescue adrenaline.</p> <p>People with a history of anaphylaxis tend to have higher levels of IgE-sensitization than those without, at least for peanut. However the overlap is so extensive that in practice, these biomarkers are not helpful in predicting life-threatening allergic reactions. The risk is that patients with low levels of IgE-sensitization might be falsely reassured they cannot have anaphylaxis, while those with high levels are wrongly counselled that they are at high risk of severe reactions</p> | <p>Informing people who react with significant symptoms to very low levels of exposure that they are not at greater risk of severe reactions may help alleviate anxiety and counteract the impact of a diagnosis of food allergy on quality of life. This also holds true in terms of interpreting the degree of IgE-sensitization correctly.</p> | <p>In people where there is a lack of information over the dose needed to cause symptoms, undertaking a supervised food challenge may result in a significant improve in self-efficacy and quality of life measures.<sup>192</sup> The cost-effectiveness of such interventions has not been evaluated.</p> <p>For most foods, there is no strong evidence that evaluation of IgE-components is helpful to predict risk of severity and inform changes in management. IgE-testing (including, for some food allergens, component-resolved diagnostics) may be cost-effective in distinguishing between IgE-sensitization with non-reactivity and true clinical allergy, but not in determining severity.</p> |

or components) or basophil activation are correlated with anaphylaxis at food challenge.<sup>181-184</sup> However, these analyses included non-reactive (but sensitized) individuals and those reacting with non-severe reactions. This skews the analysis and significantly over-estimates the specificity of the test.<sup>185</sup> Including IgE-sensitization in a model to predict severity in peanut-allergic individuals did not significantly improve predictive value compared to using clinical determinants alone.<sup>186</sup>

Some IgE-markers (e.g. Ara h 2 for peanut, Jug r 1 and Jug r 4 for walnut, Cor a 9/14 for hazelnut) imply a higher risk of systemic reaction, but do not differentiate between anaphylaxis and non-anaphylactic systemic skin reactions.<sup>187-189</sup> Sensitization to LTPs without clinical reactivity is now frequently reported,<sup>176</sup> and there is some evidence that polysensitization to Bet v 1 homologues in LTP-sensitized individuals can moderate severity.<sup>190</sup> The Task Force noted anecdotal reports that mono-sensitization to LTP may be associated with greater risk of severity, particularly in central Europe. Conversely, mono-sensitization to Bet v 1 homologues (e.g. Ara h 8 in peanut allergy) can imply PFAS and a lower risk of anaphylaxis when present in the context of low or absent sensitization to other components. However, this may not be true for other allergens (e.g. Cor a 1 in hazelnut allergy), where it is not uncommon for individuals with monosensitization to Cor a 1 to be at significant risk of systemic reactions,<sup>191</sup> possibly due to the presence of IgE-sensitization to other undetected components.



**TABLE S6.4: NUMBER OF STUDIES SCREENED, INCLUDED AND EXCLUDED**

|                                                                         |                                                                    |
|-------------------------------------------------------------------------|--------------------------------------------------------------------|
| Number of potential studies identified by database searches             | 3142                                                               |
| Number of additional potential studies identified through other sources | 27                                                                 |
| Total number of studies screened once duplicates were removed           | 3169                                                               |
| Number of studies shortlisted for full text review                      | 99                                                                 |
| Number of studies excluded after full text review                       | 16                                                                 |
| Number and type of studies included                                     | Total 83: 4 systematic reviews, 1 RCT and 78 observational studies |

Note: see the end of this supplement for a list of the studies we excluded after screening the full text.

**TABLE S6.5: DETAILS OF STUDIES INCLUDED**

| Citation                        | Study type                                          | Risk of bias | Country     | Funding source            | Total no. participants                      |                | Age                                  | Allergy type                | Severity Definition                 |
|---------------------------------|-----------------------------------------------------|--------------|-------------|---------------------------|---------------------------------------------|----------------|--------------------------------------|-----------------------------|-------------------------------------|
|                                 |                                                     |              |             |                           | Overall                                     | “Severe” group |                                      |                             |                                     |
| <b>Taylor 2010</b>              | DBPCFC Retrospective                                | Moderate     | France      | Industry and non-industry | 286                                         | 40             | ≤48 y<br>Median 7.0 y                | Peanut                      | Astier Grade 4/5                    |
| <b>Pastorello 2011</b>          | Prospective cohort                                  | High         | Italy       | Industry and non-industry | 148                                         | 72             | 13-62 y<br>Median 37 y               | Peach                       | Systemic symptoms                   |
| <b>Calvani 2011</b>             | Retrospective case series (consecutive recruitment) | Moderate     | Italy       | Industry                  | 163 included (21 excluded: incomplete data) | 36             | ≤18 y<br>Median 4y                   | Any food                    | Sampson grade 4/5                   |
| <b>Huang 2012</b>               | Retrospective case series                           | High         | USA         | Non-industry              | 192 (152 to food)                           | 15             | ≤18 y<br>Median 8 y                  | Any food                    | Brown Grade 3                       |
| <b>Neuman-Sunshine 2012</b>     | Retrospective case series                           | High         | USA         | Non-industry              | 782                                         | 164            | ≤16 y                                | Peanut                      | CVS/resp or symptoms from 3+ organs |
| <b>Eller 2012</b>               | Open and blinded FC, retrospective                  | Moderate     | Denmark     | Internal                  | 487                                         | Not stated     | 6m – 74 y [0.5–73.5]                 | Egg, milk, hazelnut, peanut | Sampson grade 4/5                   |
| <b>Nguyen-Luu 2012</b>          | Retrospective case series                           | High         | Canada      | Non-industry              | 1411                                        | N/A            | Children, mean 7.1 y                 | Peanut                      | Severe as per Hourihane 1997        |
| <b>Rolinck-Werninghaus 2012</b> | DBPCFC, prospective                                 | Moderate     | Germany     | Internal funds            | 869                                         | 51             | ≤16 y<br>Median 1 y                  | Egg, milk, soy, wheat       | Sampson grade 4/5                   |
| <b>Cianferoni 2012</b>          | Open FC, retrospective                              | High         | USA         | Not stated                | 983                                         | 111            | Mean 5 y                             | Egg, milk, peanut           | 2+ organs requiring treatment       |
| <b>Vetander 2012</b>            | Retrospective case series                           | Moderate     | Sweden      | Internal                  | 371                                         | 128            | ≤17 y<br>Mean 6 y                    | All foods                   | EAACI 2007                          |
| <b>Eller 2013</b>               | Open and blinded FC, retrospective                  | Moderate     | Denmark     | Industry + internal       | 175                                         | Not stated     | 1-26 y<br>Mean 5.6 y                 | Peanut                      | Sampson grade 4/5                   |
| <b>Masthoff 2013</b>            | DBPCFC, retrospective                               | High         | Netherlands | Industry                  | 161                                         | 79             | Median 7y (children)<br>27y (adults) | Hazelnut                    | Any objective symptoms              |

| Citation       | Study type                | Risk of bias | Country     | Funding source            | Total no. participants |                | Age                                     | Allergy type                 | Severity Definition             |
|----------------|---------------------------|--------------|-------------|---------------------------|------------------------|----------------|-----------------------------------------|------------------------------|---------------------------------|
|                |                           |              |             |                           | Overall                | “Severe” group |                                         |                              |                                 |
| van Erp 2013   | DBPCFC, retrospective     | Low          | Netherlands | Internal                  | 109                    | 24             | Median 6.7y (IQR 5-9.5)                 | Peanut                       | Sampson grade 4/5               |
| Brown 2013     | Prospective cohort        | Low          | Australia   | Non-industry              | 412<br>131 food        | 97<br>19 food  | 3-99 years<br>Median 36 y<br>IQR 24-50y | All foods                    | Brown Grade 3                   |
| Libbers 2013   | DBPCFC, retrospective     | Moderate     | Netherlands | Not stated                | 59                     | Not stated     | Children                                | Egg                          | Study-defined                   |
| Klemens 2013   | DBPCFC, retrospective     | Moderate     | Netherlands | Internal                  | 93                     | Not stated     | Mean 30 y (sd ± 12.5)                   | Peanut                       | Adapted from Mueller grade 3/4  |
| Mulla 2013     | State-wide hospital data  | Moderate     | USA         | Internal                  | 2410<br>(all trigger)  | Not stated     | Median 50 y                             | All foods                    | ICU or mechanical ventilation   |
| Johnson 2014   | Retrospective case series | Moderate     | Sweden      | Non-industry + internal   | 578                    | 239            | Median 5.9 y IQR 2.3-12y                | All foods                    | NIAID with adrenaline treatment |
| Vetander 2014  | Retrospective case series | Moderate     | Sweden      | Internal                  | 358                    | 20             | ≤17 y<br>Mean 5 y                       | All foods                    | EAACI 2007                      |
| Clark 2014     | Retrospective case series | High         | USA         | Not stated                | 11,972<br>(20% food)   | 2622           | Adults + children                       | All foods                    | Hospital/ICU admission          |
| Jerschow 2014  | Fatality case series      | Low          | USA         | Internal                  | 164                    | 164            | Adults + children                       | All foods                    | Fatal anaphylaxis               |
| Xu 2014        | Fatality case series      | Moderate     | Canada      | Internal                  | 40                     | 40             | 9-78 y<br>Mean 32 y                     | All foods                    | Fatal anaphylaxis               |
| Nassiri 2015   | Anaphylaxis registry      | High         | Europe      | Not stated                | 1222                   | 116            | Adults + children                       | All foods                    | Mueller                         |
| Turner 2015    | Fatality case series      | Moderate     | UK          | Non-industry              | 124                    | 124            | Adults + children                       | All foods                    | Fatal anaphylaxis               |
| Song 2015      | Prospective DBPCFC        | Moderate     | USA         | Industry and non industry | 58                     | Not stated     | 12-45 y                                 | Nuts, seafood, sesame        | Sampson Grade                   |
| Kukkonen 2015  | Prospective DBPCFC        | Moderate     | Finland     | Non-industry              | 69                     | 25             | 6-18y                                   | Peanut                       | Hourihane 2005                  |
| Francuzik 2015 | Anaphylaxis registry      | Moderate     | Europe      | Internal                  | 5765                   | 116            | Adults + children                       | All triggers (not just food) | Brown, Ring+Messmer             |

| Citation                  | Study type                | Risk of bias | Country                    | Funding source            | Total no. participants |                | Age                              | Allergy type                 | Severity Definition                 |
|---------------------------|---------------------------|--------------|----------------------------|---------------------------|------------------------|----------------|----------------------------------|------------------------------|-------------------------------------|
|                           |                           |              |                            |                           | Overall                | “Severe” group |                                  |                              |                                     |
| <b>Uasuf 2015</b>         | Retrospective case series | High         | Italy                      | Not stated                | 133                    | 23             | Adults                           | Peach                        | Mueller Grade 3/4                   |
| <b>De Schryver 2016</b>   | Retrospective case series | High         | Canada                     | Industry and non industry | 164                    | Not stated     | 2-12y<br>Mean 7y                 | All foods                    | Brown                               |
| <b>Deschildre 2016</b>    | Prospective cohort        | Moderate     | France, Belgium, Luxemburg | Non-industry              | 669                    | 200            | Median 9y (IQR 6-13)<br>14% >16y | Peanut                       | 2+ organs or anaphylaxis            |
| <b>Grabenhenrich 2016</b> | Anaphylaxis registry      | Moderate     | Europe                     | Internal                  | 1970<br>1092 food      | 18 food        | ≤18 y                            | All triggers (not just food) | Ring+Messmer Grade 3+ICU or Grade 4 |
| <b>Jiang 2016</b>         | Retrospective case series | High         | China                      | Non-industry              | 1501 food              | 737            | 0.4-75 y<br>Mean 30y             | All foods                    | Life-threatening anaphylaxis        |
| <b>Mullins 2016</b>       | Fatality case series      | Moderate     | Australia                  | Non-industry              | 22                     | 22             | 4-66 y<br>Median 28y             | All foods                    | Fatal anaphylaxis                   |
| <b>Versluis 2016</b>      | Retrospective cohort      | High         | Netherlands                | Industry and non industry | 496                    | 258            | Mean 33 y (sd 12.5)              | All foods                    | Mueller grade 3/4                   |
| <b>Stensgaard 2017</b>    | Cross-sectional study     | High         | Denmark                    | Not stated                | 369                    | N/A            | Mean 15 y (sd 8.1 y)             | Peanut, hazelnut, egg,       | N/A                                 |
| <b>Chan 2017</b>          | Open FC, prospective      | Low          | Australia                  | Non-industry              | 726                    | 19             | Age 1-4y                         | Peanut, egg, sesame          | Anaphylaxis (ASCIA)                 |
| <b>Abrams 2017</b>        | Open FC, retrospective    | High         | Canada                     | Internal                  | 104                    | 20             | ≤18y<br>Median 5.5y              | All foods                    | Study-defined anaphylaxis           |
| <b>Motosue 2017</b>       | Retrospective case series | High         | USA                        | Internal                  | 10464                  | 591            | Adults + children                | All foods                    | Hospital/ICU admission              |
| <b>Nieto-Nieto 2017</b>   | Population hospital data  | Moderate     | Spain                      | Internal                  | 5261                   |                |                                  |                              | ICU/mechanical ventilation          |
| <b>Yanagida 2017</b>      | DBPCFC, retrospective     | Moderate     | Japan                      | Non-industry              | 393                    | 98             | Children >5y<br>Median 8.3y      | Milk, egg, wheat, peanut     | Study-defined                       |
| <b>Datema 2018</b>        | DBPCFC, prospective       | Moderate     | Europe                     | Non-industry              | 423<br>87 with FC      | 116<br>32 FC   | Adults + children                | Hazelnut                     | Study-defined anaphylaxis           |

| Citation                           | Study type                     | Risk of bias | Country                | Funding source            | Total no. participants        |                | Age                    | Allergy type                        | Severity Definition               |
|------------------------------------|--------------------------------|--------------|------------------------|---------------------------|-------------------------------|----------------|------------------------|-------------------------------------|-----------------------------------|
|                                    |                                |              |                        |                           | Overall                       | “Severe” group |                        |                                     |                                   |
| <b>Reier-Nilsen 2018</b>           | DBPCFC, prospective            | Moderate     | Norway                 | Industry and non-industry | 96                            | Not stated     | 5-15 y<br>Median 9.7y  | Peanut                              | EAACI 2007, Sampson               |
| <b>Worm 2018</b>                   | Anaphylaxis registry           | Moderate     | Europe                 | Internal                  | 2588 food                     | 953            | Children + Adults      | All foods                           | Ring & Messmer                    |
| <b>Pettersson 2018</b>             | DBPCFC, prospective            | Moderate     | Netherlands            | Internal                  | 734                           | 270            | ≤18y<br>Median 6y      | Milk, egg, peanut, hazelnut, cashew | Astier Grade 4                    |
| <b>Kennard 2018</b>                | Retrospective case series      | High         | UK                     | Internal                  | 132                           | 87             | Adults                 | WDEIA                               | Brown                             |
| <b>Dua 2018</b>                    | Open+blinded FC, prospective   | Low          | UK                     | Non-industry              | 160                           | 14             | Adults                 | Peanut                              | Ewan & Clark                      |
| <b>Christensen 2018</b>            | Open FC, prospective           | Low          | Denmark                | Internal                  | 71<br>46 with +ve FC          | Not stated     | 20-73 y<br>Mean, 43y   | WDEIA                               | Sampson                           |
| <b>Chinthrajah 2018</b>            | DBPCFC, prospective            | Moderate     | USA                    | Non-industry              | 120                           | 22             | 4-18 y<br>Median 11y   | Peanut                              | Study-defined                     |
| <b>Pouessel 2018</b>               | Prospective cohort             | Moderate     | France                 | Not stated                | 62                            | 44             | Children               | All foods                           | Ring & Messmer Grade 3/4 with ICU |
| <b>Arkwright 2018</b>              | Open+blinded FC, retrospective | Moderate     | UK, Ireland, Australia | Non-industry              | 525                           | 55             | Children               | Peanut                              | Anaphylaxis (ASCIA)               |
| <b>Purington 2018</b>              | DBPCFC, retrospective          | Moderate     | USA                    | Non-industry              | 410                           | 98             | 1-52y<br>Median 9y     | All foods                           | Study-defined                     |
| <b>Versluis 2019</b>               | Prospective cohort             | Moderate     | Netherlands            | Industry and non-industry | 157                           | 41             | 18-70y<br>Mean 35y     | All foods                           | Mueller grade 3/4                 |
| <b>Datema 2019</b>                 | Open+blinded FC, retrospective | Moderate     | Denmark                | Industry and non-industry | 181                           | 118            | 0.6-27 y<br>Mean 6.5 y | Peanut                              | Sampson grade 3/4                 |
| <b>Tejedor-Alonso 2019</b>         | Systematic review              | Low-moderate | Variable               | Internal                  | 15 studies<br>15,072 patients | Not stated     | Not stated             | All foods                           | Varied with study                 |
| <b>Pouessel 2019<sup>a,b</sup></b> | Case series                    | Moderate     | France                 | Industry and non-industry | 18                            | 18             | 6-62y<br>Median 15y    | All foods                           | Fatal anaphylaxis, PICU admission |

| Citation                  | Study type                   | Risk of bias | Country                         | Funding source         | Total no. participants                          |                  | Age                    | Allergy type     | Severity Definition                                        |
|---------------------------|------------------------------|--------------|---------------------------------|------------------------|-------------------------------------------------|------------------|------------------------|------------------|------------------------------------------------------------|
|                           |                              |              |                                 |                        | Overall                                         | “Severe” group   |                        |                  |                                                            |
| <b>Ballmer-Weber 2019</b> | Open+blinded FC, prospective | Moderate     | Switzerland, Germany, and Spain | Incomplete declaration | 91<br>15 DBPCFC<br>46 open FC<br>30 anaphylaxis | 70<br>40 with FC | Children + Adults      | Walnut           | Systemic reaction                                          |
| <b>Ramsey 2019</b>        | Case series -ICU data        | Moderate     | USA, Canada                     | Internal               | 1989                                            | 19               | Children               | All foods        | ICU admission                                              |
| <b>Dua 2019</b>           | RCT                          | Low          | UK                              | Non-industry           | 100                                             | Not stated       | Adults                 | Peanut           | Adrenaline use                                             |
| <b>Francuzik 2019</b>     | Anaphylaxis registry         | Moderate     | Europe                          | Internal               | 5765<br>1162 food                               | 42<br>9 food     | Adults + children      | All triggers     | 3+ doses of adrenaline                                     |
| <b>Shaker 2020</b>        | Systematic review            | Low          | Variable                        | Internal               | 32 studies                                      | Not stated       | Adults + children      | All triggers     | Biphasic anaphylaxis                                       |
| <b>Poirot 2020</b>        | Fatality case series         | Moderate     | USA                             | Internal               | 24                                              | 24               | Adults + children      | All foods        | Fatal anaphylaxis                                          |
| <b>Kiewiet 2020</b>       | Retrospective case series    | Moderate     | Sweden                          | Non-industry           | 128                                             | 60               | 19-76 y<br>Median 51y  | Alpha-gal (meat) | Study-defined                                              |
| <b>Santos 2020</b>        | Open FC, prospective         | Moderate     | UK                              | Non-industry           | 117                                             | 13               | 5-6 y                  | Peanut           | CTCAE grade severe                                         |
| <b>Olabarri 2020</b>      | Prospective cohort           | Moderate     | Spain                           | Non-industry           | 453 episodes of anaphylaxis<br>396 due to food  | 61               | Median 5 y (IQR 2-9 y) | All foods        | 2+ doses of adrenaline, biphasic reaction, intubation, ICU |
| <b>Kraft 2020</b>         | Anaphylaxis registry         | Moderate     | Europe                          | Internal               | 9171<br>3343 food                               | 435<br>158 food  | Adults + children      | All triggers     | Biphasic reaction                                          |
| <b>Su 2020</b>            | Retrospective case series    | Moderate     | USA                             | Non-industry           | 203                                             | 19               | Adults + children      | All triggers     | Poor weight gain                                           |
| <b>Kaur 2021</b>          | Open FC, prospective         | Moderate     | Australia                       | Internal               | 89                                              | 30               | Median 9 y (IQR 6-12y) | Peanut           | Study-defined                                              |
| <b>Goldberg 2021</b>      | Open FC, prospective         | Moderate     | Israel                          | Internal               | 120                                             | 60               | Median 8 y (IQR 6-11y) | Walnut           | WAO 2010                                                   |

| Citation                     | Study type                                | Risk of bias | Country   | Funding source | Total no. participants      |                  | Age                               | Allergy type    | Severity Definition       |
|------------------------------|-------------------------------------------|--------------|-----------|----------------|-----------------------------|------------------|-----------------------------------|-----------------|---------------------------|
|                              |                                           |              |           |                | Overall                     | “Severe” group   |                                   |                 |                           |
| <b>Tejedor-Alonso 2021</b>   | Systematic review                         | Low-moderate | Variable  | Internal       | 13 studies                  | Not stated       | Not stated                        | All triggers    | Varied with study         |
| <b>Yonkof 2021</b>           | Open FC, retrospective                    | Moderate     | USA       | Internal       | 158                         | Not stated       | Children                          | Egg, milk, nuts | NIAID                     |
| <b>Maris 2021</b>            | Anaphylaxis registry                      | High         | Europe    | Internal       | 1962                        | 304              | ≤17 years                         | All foods       | Ring & Messmer G3/4       |
| <b>Baseggio Conrado 2021</b> | Fatality case series                      | Moderate     | UK        | Non-industry   | 187                         | 187              | Adults + children                 | All foods       | Fatal anaphylaxis         |
| <b>Miceli Sopo 2021</b>      | Open FC (FPIES), retrospective            | Moderate     | Italy     | Not stated     | 91<br>48 with +ve FC        | 4                | ≤10y<br>Mean 2y                   | All foods       | ICON FPIES guideline      |
| <b>Gabrielli 2021a</b>       | Case registry (prospective+retrospective) | Moderate     | Canada    | Non-industry   | 3498<br>2769 food           | 240              | Median 8y (IQR 3-16y)<br>20% ≥16y | All triggers    | EAACI 2007; admission±ICU |
| <b>Gabrielli 2021b</b>       | Case registry (prospective+retrospective) | Moderate     | Canada    | Non-industry   | 250                         | 27               | Median 10y (IQR 3-23y)            | Fruit only      | EAACI 2007                |
| <b>Lyons 2021</b>            | Prospective cohort                        | Moderate     | Europe    | Non-industry   | 531<br>336 with probable FA | 90               | Mean 30y (sd ±13.9 y)<br>15% <18y | Walnut          | Study-defined anaphylaxis |
| <b>Kraft 2021</b>            | Anaphylaxis registry                      | High         | Europe    | Internal       | 1691<br>250 wheat           | 667<br>153 wheat | 13+ y                             | Wheat           | Brown                     |
| <b>Lam 2021</b>              | Population hospital data                  | Moderate     | UK        | Internal       | 15,405                      | N/A              | Adults + children                 | All foods       | Hospital admission        |
| <b>Turner 2021</b>           | DBPCFC, prospective                       | Low          | UK, Spain | Non-industry   | 83                          | 16               | Children 6-18 y, median 10 y      | Cow’s Milk      | Anaphylaxis (WAO 2020)    |
| <b>Baseggio Conrado 2021</b> | Systematic review                         | Low          | Variable  | Internal       | 65 studies                  | Not stated       | Adults + children                 | All triggers    | Study-defined anaphylaxis |
| <b>Kennedy 2021</b>          | Open FC, retrospective                    | High         | USA       | Internal       | 675                         | 128              | ≤18 y<br>Medial 6 y               | All foods       | Study-defined             |





**TABLE S6.6: SUMMARY OF RISK OF BIAS**

| Study                    | Selection bias | External validity* | Case definition valid? | Data collection valid and systematic? | Recall bias | Internal validity** | Overall risk of bias |
|--------------------------|----------------|--------------------|------------------------|---------------------------------------|-------------|---------------------|----------------------|
| Taylor et al, 2010       | Low            | +                  | ++                     | +                                     | Low         | +                   | Low                  |
| Pastorello 2011          | Moderate       | ±                  | ±                      | ±                                     | High        | ±                   | High                 |
| Calvani 2011             | Moderate       | +                  | +                      | ±                                     | Moderate    | +                   | Moderate             |
| Huang 2012               | Moderate       | ±                  | +                      | ±                                     | High        | ±                   | High                 |
| Neuman-Sunshine 2012     | Moderate       | ±                  | +                      | ±                                     | High        | ±                   | High                 |
| Eller 2012               | Moderate       | +                  | ++                     | +                                     | Low         | +                   | Moderate             |
| Nguyen-Luu 2012          | High           | ±                  | +                      | +                                     | High        | ±                   | High                 |
| Rolinck-Werninghaus 2012 | Moderate       | +                  | ++                     | ++                                    | Low         | ++                  | Moderate             |
| Cianferoni 2012          | Moderate       | ±                  | ±                      | ±                                     | Moderate    | ±                   | High                 |
| Vetander 2012            | Moderate       | +                  | +                      | ±                                     | Moderate    | ±                   | Moderate             |
| Eller 2013               | Moderate       | +                  | ++                     | +                                     | Low         | +                   | Moderate             |
| Masthoff 2013            | High           | ±                  | ±                      | +                                     | Moderate    | ±                   | High                 |
| van Erp 2013             | Low            | +                  | +                      | +                                     | Low         | ++                  | Low                  |
| Brown 2013               | Low            | ++                 | ++                     | +                                     | Low         | ++                  | Low                  |
| Libbers 2013             | Moderate       | +                  | +                      | +                                     | Low         | +                   | Moderate             |
| Klemens 2013             | Moderate       | +                  | +                      | +                                     | Low         | ++                  | Moderate             |
| Mulla 2013               | Moderate       | +                  | ±                      | +                                     | Moderate    | ±                   | Moderate             |
| Johnson 2014             | Moderate       | +                  | ±                      | ±                                     | Moderate    | +                   | Moderate             |
| Vetander 2014            | Low            | +                  | +                      | +                                     | Moderate    | +                   | Moderate             |
| Clark 2014               | High           | ±                  | ±                      | +                                     | Moderate    | ±                   | High                 |
| Jerschow 2014            | Moderate       | +                  | ++                     | +                                     | Low         | +                   | Low                  |
| Xu 2014                  | Moderate       | ±                  | ++                     | +                                     | Moderate    | +                   | Moderate             |
| Nassiri 2015             | Moderate       | ±                  | +                      | ±                                     | High        | ±                   | High                 |
| Turner 2015              | Moderate       | +                  | ++                     | +                                     | Low         | +                   | Moderate             |
| Song 2015                | Moderate       | ±                  | +                      | +                                     | Low         | +                   | Moderate             |
| Kukkonen 2015            | Moderate       | +                  | +                      | +                                     | Low         | +                   | Moderate             |
| Francuzik 2015           | Moderate       | ±                  | +                      | +                                     | Moderate    | ±                   | Moderate             |
| De Schryver 2016         | High           | ±                  | +                      | ±                                     | Low         | -                   | High                 |
| Deschildre 2016          | Moderate       | ±                  | +                      | ±                                     | Moderate    | ±                   | Moderate             |
| Uasuf 2015               | Moderate       | ±                  | +                      | ±                                     | High        | ±                   | High                 |
| Grabenherrich 2016       | Moderate       | ±                  | +                      | +                                     | Moderate    | ±                   | Moderate             |
| Jiang 2016               | High           | ±                  | +                      | ±                                     | High        | -                   | High                 |
| Mullins 2016             | Moderate       | +                  | ++                     | +                                     | Low         | +                   | Moderate             |
| Versluis 2016            | Moderate       | ±                  | ±                      | +                                     | High        | ±                   | High                 |
| Stensgaard 2017          | High           | ±                  | ±                      | ±                                     | High        | +                   | High                 |
| Chan 2017                | Low            | ++                 | +                      | ++                                    | Low         | +                   | Low                  |
| Abrams 2017              | High           | ±                  | +                      | +                                     | Moderate    | +                   | High                 |
| Motosue 2017             | High           | +                  | ±                      | ±                                     | Low         | ±                   | High                 |

| Study                 | Selection bias | External validity* | Case definition valid? | Data collection valid and systematic? | Recall bias | Internal validity** | Overall risk of bias |
|-----------------------|----------------|--------------------|------------------------|---------------------------------------|-------------|---------------------|----------------------|
| Nieto-Nieto 2017      | Moderate       | +                  | ±                      | +                                     | Moderate    | ±                   | Moderate             |
| Yanagida 2017         | Moderate       | +                  | ±                      | +                                     | Low         | +                   | Moderate             |
| Datema 2018           | Moderate       | ±                  | +                      | +                                     | Low         | +                   | Moderate             |
| Reier-Nilsen 2018     | Moderate       | ±                  | +                      | ++                                    | Low         | +                   | Moderate             |
| Worm 2018             | Moderate       | ±                  | +                      | +                                     | Moderate    | ±                   | Moderate             |
| Pettersson 2018       | Moderate       | +                  | +                      | +                                     | Low         | +                   | Moderate             |
| Kennard 2018          | High           | ±                  | +                      | ±                                     | High        | +                   | High                 |
| Dua 2018              | Moderate       | +                  | +                      | +                                     | Low         | +                   | Low                  |
| Christensen 2018      | Moderate       | +                  | +                      | +                                     | Low         | +                   | Low                  |
| Chinthrajah 2018      | Moderate       | ±                  | +                      | +                                     | Low         | +                   | Moderate             |
| Pouessel 2018         | Moderate       | ±                  | +                      | ±                                     | Moderate    | ±                   | Moderate             |
| Arkwright 2018        | Moderate       | ±                  | +                      | ±                                     | Moderate    | ±                   | Moderate             |
| Purington 2018        | Moderate       | ±                  | +                      | +                                     | Moderate    | ±                   | Moderate             |
| Versluis 2019         | Moderate       | ±                  | +                      | +                                     | Low         | +                   | Moderate             |
| Datema 2019           | Moderate       | +                  | ++                     | +                                     | Low         | +                   | Moderate             |
| Tejedor-Alonso 2019   | N/A            | N/A                | +                      | ±                                     | N/A         | +                   | Low-moderate         |
| Pouessel 2019         | Moderate       | +                  | ++                     | +                                     | Low         | +                   | Moderate             |
| Ballmer-Weber 2019    | Moderate       | +                  | ±                      | +                                     | Moderate    | +                   | Moderate             |
| Ramsey 2019           | Moderate       | +                  | +                      | +                                     | Low         | +                   | Moderate             |
| Dua 2019              | Moderate       | +                  | +                      | ++                                    | Low         | ++                  | Low                  |
| Francuzik 2019        | Moderate       | ±                  | +                      | +                                     | Moderate    | ±                   | Moderate             |
| Shaker 2020           | N/A            | +                  | +                      | +                                     | N/A         | +                   | Low                  |
| Poirot 2020           | Moderate       | +                  | +                      | ±                                     | Low         | +                   | Moderate             |
| Kiewiet 2020          | Moderate       | ±                  | +                      | +                                     | Moderate    | ±                   | Moderate             |
| Santos 2020           | Moderate       | +                  | ±                      | +                                     | Low         | ±                   | Moderate             |
| Olabarri 2020         | Moderate       | +                  | +                      | ±                                     | Low         | +                   | Moderate             |
| Kraft 2020            | Moderate       | ±                  | +                      | +                                     | Moderate    | ±                   | Moderate             |
| Su 2020               | Moderate       | +                  | ±                      | ±                                     | Low         | +                   | Moderate             |
| Kaur 2021             | Moderate       | +                  | +                      | +                                     | Low         | +                   | Moderate             |
| Goldberg 2021         | Moderate       | ±                  | +                      | +                                     | Low         | +                   | Moderate             |
| Tejedor-Alonso 2021   | N/A            | N/A                | +                      | ±                                     | N/A         | +                   | Low-moderate         |
| Yonkof 2021           | High           | ±                  | +                      | +                                     | Low         | +                   | Moderate             |
| Maris 2021            | Moderate       | ±                  | ±                      | ±                                     | Moderate    | ±                   | High                 |
| Baseggio Conrado 2021 | Moderate       | +                  | ++                     | +                                     | Low         | +                   | Moderate             |
| Miceli Sopo 2021      | Moderate       | +                  | +                      | +                                     | Moderate    | +                   | Moderate             |
| Gabrielli 2021a       | Moderate       | ++                 | +                      | +                                     | Low         | +                   | Moderate             |
| Gabrielli 2021b       | Moderate       | ++                 | +                      | +                                     | Low         | +                   | Moderate             |
| Lyons 2021            | Moderate       | ±                  | +                      | ++                                    | Moderate    | ++                  | Moderate             |
| Lam 2021              | Moderate       | +                  | ±                      | +                                     | Moderate    | +                   | Moderate             |
| Turner 2021           | Moderate       | +                  | +                      | ++                                    | Low         | ++                  | Low                  |

| Study                 | Selection bias | External validity* | Case definition valid? | Data collection valid and systematic? | Recall bias | Internal validity** | Overall risk of bias |
|-----------------------|----------------|--------------------|------------------------|---------------------------------------|-------------|---------------------|----------------------|
| Kraft 2021            | Moderate       | ±                  | ±                      | ±                                     | Moderate    | ±                   | High                 |
| Baseggio Conrado 2021 | Moderate       | ++                 | ±                      | ±                                     | Low         | +                   | Moderate             |
| Kennedy 2021          | High           | +                  | +                      | ±                                     | Moderate    | ±                   | High                 |
| Datema 2021           | Moderate       | ±                  | ±                      | +                                     | Moderate    | +                   | Moderate             |

\*External validity assesses whether selection bias impacts on whether the study data are generalizable to the overall food-allergic population, and described as ++ (all or most of the criteria have been fulfilled, and where not the conclusions are very unlikely to alter), + (some criteria have been fulfilled, and where not fulfilled or adequately described, the conclusions are unlikely to alter), – (few or no checklist criteria fulfilled). \*\*Internal validity reflects the degree of systematic data collection and how this data was sourced (e.g. direct from patients, contemporaneous medical notes, historical case notes)

**TABLE S6.7: REASONS WHY STUDIES SCREENED AS FULL TEXT WERE EXCLUDED**

| Study                                                                                                                                                                                                        | Reason not eligible                                                                                                           |
|--------------------------------------------------------------------------------------------------------------------------------------------------------------------------------------------------------------|-------------------------------------------------------------------------------------------------------------------------------|
| Ballini et al. Frequency of positive oral food challenges and their outcomes in the allergy unit of a tertiary-care pediatric hospital. <i>Allergol Immunopathol (Madr)</i> . 2021;49(3):120-130.            | Only 14 positive challenges FPIES challenges reported<br>No robust analysis of severity for OFC for IgE-mediated food allergy |
| Blazowski et al. Food allergy endotype with high risk of severe anaphylaxis in children-Monosensitization to cashew 2S albumin Ana o 3. <i>Allergy</i> 2019;74(10):1945-1955.                                | Unclear how many individuals with anaphylaxis included. “Severe” anaphylaxis cohort included 77 children.                     |
| Buka et al. Anaphylaxis and ethnicity: higher incidence in British South Asians. <i>Allergy</i> . 2015;70(12):1580-7.                                                                                        | Only 38 reactions to food included.                                                                                           |
| Hompes et al. Elicitors and co-factors in food-induced anaphylaxis in adults. <i>Clin Transl Allergy</i> . 2013 Nov 21;3(1):38.                                                                              | <50 food-allergic individuals with positive FC included.                                                                      |
| Kim et al. Clinical Manifestations and Risk Factors of Anaphylaxis in Pollen-Food Allergy Syndrome. <i>Yonsei Med J</i> . 2019;60:960-968.                                                                   | No FC reported, and <500 participants.                                                                                        |
| Klingebliel et al. Pru p 7 sensitization is a predominant cause of severe, cypress pollen-associated peach allergy. <i>Clin Exp Allergy</i> 2019;49(4):526-536.                                              | Only 78 patients with prior anaphylaxis included (<100).                                                                      |
| Kotaniemi-Syrjänen et al. Likelihood of Immediate Food Challenge Reactions Varies by Age, History, Allergens, and Levels of Sensitization. <i>Pediatric Allergy, Immunology, and Pulmonology</i> 2017.45-52. | No analyses in terms of severity following FC.                                                                                |
| Lee et al. Antihypertensive medication use is associated with increased organ system involvement and hospitalization in emergency department patients with anaphylaxis. <i>JACI</i> 2013;131(4):1103-8.      | Only 82 (<100) food-allergic individuals with anaphylaxis included.                                                           |
| Masthoff et al. Diagnostic value of hazelnut allergy tests including rCor a 1 spiking in double-blind challenged children. <i>Allergy</i> . 2012;67:521-7.                                                   | Only 32 objective reactions to hazelnut included                                                                              |
| Sahiner et al. Serum basal tryptase may be a good marker for predicting the risk of anaphylaxis in children with food allergy. <i>Allergy</i> . 2014;69(2):265-8.                                            | <100 food-allergic individuals with anaphylaxis included.                                                                     |
| Sala-Cunill et al. Usefulness and limitations of sequential serum tryptase for the diagnosis of anaphylaxis in 102 patients. <i>Int Arch Allergy Immunol</i> . 2013;160(2):192-9.                            | Only 35 reactions to food included.                                                                                           |

| Study                                                                                                                                                                                                                                                                                                 | Reason not eligible                                                                                                                                  |
|-------------------------------------------------------------------------------------------------------------------------------------------------------------------------------------------------------------------------------------------------------------------------------------------------------|------------------------------------------------------------------------------------------------------------------------------------------------------|
| Sánchez-Ruano et al. Clinical utility of microarray B-cell epitope mapping in food allergies: A systematic review. <i>Pediatr Allergy Immunol.</i> 2020;31(2):175-185.                                                                                                                                | No analyses relating to severity reported.                                                                                                           |
| Santos et al. Distinct parameters of the basophil activation test reflect the severity and threshold of allergic reactions to peanut. <i>JACI</i> 2015;135(1):179-86.                                                                                                                                 | Overlap with Santos et al 2020                                                                                                                       |
| Srivastava et al. Systemic reactions and anaphylaxis with an acute serum tryptase $\geq 14$ $\mu\text{g/L}$ : retrospective characterization of etiology, severity and adherence to NICE guidelines for serial tryptase measurements and specialist referral. <i>J Clin Pathol.</i> 2014;67(7):614-9. | Only 10 reactions to food included.                                                                                                                  |
| Ta et al. Use of Specific IgE and Skin Prick Test to Determine Clinical Reaction Severity. <i>Br J Med Med Res.</i> 2011;1(4):410-429.                                                                                                                                                                | N=24 only                                                                                                                                            |
| Wang et al. Food Protein-Induced Enterocolitis Syndrome Food Challenges: Experience from a Large Referral Center. <i>JACI Pract.</i> 2019 Feb;7(2):444-450.                                                                                                                                           | Only 30 challenges positive (<50), with most FC undertaken to demonstrate resolution. Analysis of risk factors for historical severity not possible. |

## REFERENCES

1. Dupont C, Hol J, Nieuwenhuis EE. Cow's milk allergy modified by elimination and lactobacilli study group. an extensively hydrolyzed casein-based formula for infants with cow's milk protein allergy: tolerance/hypo-allergenicity and growth catch-up. *Br J Nutr* 2015;113(7):1102-12.
2. Viljanen M, Kuitunen M, Haahtela T, Juntunen-Backman K, Korpela R, Savilahti E. Probiotic effects on faecal inflammatory markers and on faecal IgA in food allergic atopic eczema/dermatitis syndrome infants. *Pediatr Allergy Immunol* 2005;16(1):65-71.
3. Niggemann B, Binder C, Dupont C, Hadji S, Arvola T, Isolauri E. Prospective, controlled, multi-center study on the effect of an amino-acid-based formula in infants with cow's milk allergy/intolerance and atopic dermatitis. *Pediatr Allergy Immunol* 2001;12(2):78-82.
4. Caffarelli C, Plebani A, Poiesi C, Petroccione T, Spattini A, Cavagni G. Determination of allergenicity to three cow's milk hydrolysates and an amino acid-derived formula in children with cow's milk allergy. *Clin Exp All* 2002;32:74-79.
5. Capucilli P, Kennedy K, Lee J, Grundmeier RW, Spergel JM. Accidental versus new food allergy reactions in a pediatric emergency department. *J Allergy Clin Immunol Pract* 2019;7(5):1662-1664.
6. Fleischer DM, Perry TT, Atkins D, Wood RA, Burks AW, Jones SM et al. Allergic reactions to foods in preschool-aged children in a prospective observational food allergy study. *Pediatrics*. 2012;130(1):e25-32.
7. Lambert R, Grimshaw KEC, Ellis B, Jaitly J, Roberts G. Evidence that eating baked egg or milk influences egg or milk allergy resolution: a systematic review. *Clin Exp Allergy* 2017;47(6):829-837.
8. Esmaeilzadeh H, Alyasin S, Haghghat M, Nabavizadeh H, Esmaeilzadeh E, Mosavat F. The effect of baked milk on accelerating unheated cow's milk tolerance: A control randomized clinical trial. *Pediatr Allergy Immunol* 2018;29(7):747-753.
9. Munblit D, Perkin MR, Palmer DJ, Allen KJ, Boyle RJ. Assessment of evidence about common infant symptoms and cow's milk allergy. *JAMA Pediatr* 2020;174(6):599-608.
10. Høst A, Husby S, Hansen LG, Osterballe O. Bovine beta-lactoglobulin in human milk from atopic and non-atopic mothers. Relationship to maternal intake of homogenized and unhomogenized milk. *Clin Exp Allergy* 1990;20(4):383-387.
11. Høst A, Husby S, Osterballe O. A prospective study of cow's milk allergy in exclusively breast-fed infants. Incidence, pathogenetic role of early inadvertent exposure to cow's milk formula, and characterization of bovine milk protein in human milk. *Acta Paediatr Scand* 1988; 77(5):663-670.
12. Munblit D, Peroni DG, Boix-Amorós A, Hsu PS, Van't Land B, Gay MCL, Kolotilina A, Skevaki C, Boyle RJ, Collado MC, Garssen J, Geddes DT, Nanan R, Slupsky C, Wegienka G, Kozyrskyj AL, Warner JO. Human Milk and Allergic Diseases: An Unsolved Puzzle. *Nutrients* 2017;9(8):894.
13. Dupont C, Hol J, Nieuwenhuis EE; Cow's Milk Allergy Modified by Elimination and Lactobacilli study group. An extensively hydrolyzed casein-based formula for infants with cow's milk protein allergy: tolerance/hypo-allergenicity and growth catch-up. *Br J Nutr* 2015;113(7):1102-12.
14. Kirjavainen PV, Salminen SJ, Isolauri E. Probiotic bacteria in the management of atopic disease: underscoring the importance of viability. *J Pediatr Gastroenterol Nutr* 2003;36(2):223-227.
15. Terheggen-Lagro SW, Khouw IM, Schaafsma A, Wauters EA. Safety of a new extensively hydrolyzed formula in children with cow's milk protein allergy: a double blind crossover study. *BMC Pediatr* 2002;2:10.
16. Berni Canani R, Nocerino R, Terrin G, Coruzzo A, Cosenza L, Leone L, Troncone R. Effect of *Lactobacillus* GG on tolerance acquisition in infants with cow's milk allergy: a randomized trial. *J Allergy Clin Immunol* 2012;129(2): e581–585.

17. Niggemann B, von Berg A, Bollrath C, Berdel D, Schauer U, Rieger C, Haschke-Becher E, Wahn U. Safety and efficacy of a new extensively hydrolyzed formula for infants with cow's milk protein allergy. *Pediatr Allergy Immunol*. 2008;19(4):348-354.
18. Isolauri E, Sütas Y, Mäkinen-Kiljunen S, Oja SS, Isosomppi R, Turjanmaa K. Efficacy and safety of hydrolyzed cow milk and amino acid-derived formulas in infants with cow milk allergy. *J Pediatr* 1995;127(4):550-557.
19. Vandenplas Y, Steenhout P, Planoudis Y, Grathwohl D. Treating cow's milk protein allergy: a double-blind randomized trial comparing two extensively hydrolyzed formulas with probiotics. *Acta Paediatr* 2013;102(10):990-998.
20. Berni Canani R, Di Costanzo M, Bedogni G, Amoroso A, Cosenza L, Di Scala C, Granata V, Nocerino R. Extensively hydrolyzed casein formula containing *Lactobacillus rhamnosus* GG reduces the occurrence of other allergic manifestations in children with cow's milk allergy: 3-year randomized controlled trial. *J Allergy Clin Immunol* 2017;139(6):1906-1913.e4.
21. Niggemann B, Binder C, Dupont C, Hadji S, Arvola T, Isolauri E. Prospective, controlled, multi-centre study on the effect of an amino-acid-based formula in infants with cow's milk allergy/intolerance and atopic dermatitis. *Pediatr Allergy Immunol* 2001;12(2):78-82.
22. Klemola T, Vanto T, Juntunen-Backman K, Kalimo K, Korpela R, Varjonen E. Allergy to soy formula and to extensively hydrolyzed whey formula in infants with cow's milk allergy: A prospective, randomized study with a follow-up to the age of 2 years. *J Pediatr* 2002;140:219-224
23. Hill DJ, Cameron DJ, Francis DE, Gonzalez-Andaya AM, Hosking CS. Challenge confirmation of late-onset reactions to extensively hydrolyzed formulas in infants with multiple food protein intolerance. *J Allergy Clin Immunol* 1995;96(3):386-394.
24. Caffarelli C, Plebani A, Poesi C, Petroccione T, Spattini A, Cavagni G. Determination of allergenicity to three cow's milk hydrolysates and an amino acid-derived formula in children with cow's milk allergy. *Clin Exp All* 2002;32:74-79.
25. Nowak-Węgrzyn A, Czerkies L, Kuslys M, et al Hypoallergenicity of a whey-based, extensively hydrolyzed infant formula prepared with nonporcine enzymes. *Allergy* 2019a; 74: 1582-4.
26. Nowak-Węgrzyn, A.; Czerkies, L.; Reyes, K et al. Confirmed Hypoallergenicity of a Novel Whey-Based Extensively Hydrolyzed Infant Formula Containing Two Human Milk Oligosaccharides. *Nutrients* 2019b, 11, 1447
27. Nutten S, Maynard F, Järvi A, Rytz A, Simons PJ, Heine RG, Kuslys M. Peptide size profile and residual immunogenic milk protein or peptide content in extensively hydrolyzed infant formulas. *Allergy*. 2019;00:1–4.
28. Muraro A, Werfel T, Hoffmann-Sommergruber K, Roberts G, Beyer K, Bindslev-Jensen C, Cardona V, Dubois A, Dutoit G, Eigenmann P, Fernandez Rivas M. EAACI food allergy and anaphylaxis guidelines: diagnosis and management of food allergy. *Allergy* 2014;69(8):1008-1025.
29. American Academy of Pediatrics. Committee on Nutrition. Hypoallergenic infant formulas. *Pediatrics* 2000;106(2 Pt 1):346-9.
30. Canani RB, Nocerino R, Frediani T, Lucarelli S, Di Scala C, Varin E, Leone L, Muraro A, Agostoni C. Amino acid-based formula in cow's milk allergy: long-term effects on body growth and protein metabolism. *J Pediatr Gastroenterol Nutr* 2017;64(4):632-638.
31. Agostoni C, Fiocchi A, Riva E, Terracciano L, Sarratud T, Martelli A, Lodi F, D'Auria E, Zuccotti G, Giovannini M. Growth of infants with IgE-mediated cow's milk allergy fed different formulas in the complementary feeding period. *Pediatr Allergy Immunol* 2007;18(7):599-606.
32. WHO. Maternal, infant and young child nutrition. 2016. EB138/8.
33. Maslin et al. Palatability of hypoallergenic formulas for cow's milk allergy and healthcare professional recommendation. *Pediatr Allergy Immunol*. 2018;29:857–862
34. de Jong NW, Sprikkelman AB, Oude Elberink HN, Arends NJ, Vlieg-Boerstra BJ. Blinded sensory evaluation of extensively hydrolyzed formulas and amino acid formulas. *Ann Allergy Asthma Immunol*. 2014;113(2):235-6.

35. Dupont C, Kalach N, Soulaines P, Bradatan E, Lachaux A, Payot F, de Blay F, Guénard-Bilbault L, Hatahet R, Mulier S. A thickened amino-acid formula in infants with cow's milk allergy failing to respond to protein hydrolysate formulas: a randomized double-blind trial. *Paediatr Drugs* 2014;16(6):513-22.
36. Nowak-Węgrzyn A, Czerkies LA, Collins B, Saavedra JM. Evaluation of hypoallergenicity of a new, amino acid-based formula. *Clin Pediatr* 2015;54(3):264-272.
37. Niggemann B, von Berg A, Bollrath C, Berdel D, Schauer U, Rieger C, Haschke-Becher E, Wahn U. Safety and efficacy of a new extensively hydrolyzed formula for infants with cow's milk protein allergy. *Pediatr Allergy Immunol.* 2008;19(4):348-354.
38. Burks AW, Harthoorn LF, Van Ampting MT, Oude Nijhuis MM, Langford JE, Wopereis H, Goldberg SB, Ong PY, Essink BJ, Scott RB, Harvey BM. Synbiotics-supplemented amino acid-based formula supports adequate growth in cow's milk allergic infants. *Pediatr Allergy Immunol* 2015;26(4):316-22.
39. Candy DCA, Van Ampting MTJ, Oude Nijhuis MM, Wopereis H, Butt AM, Peroni DG, Vandenplas Y, Fox AT, Shah N, West CE, Garssen J, Harthoorn LF, Knol J, Michaelis LJ. A synbiotic-containing amino-acid-based formula improves gut microbiota in non-IgE-mediated allergic infants. *Pediatr Res* 2018;83(3):677-686.
40. Niggemann B, Binder C, Dupont C, Hadji S, Arvola T, Isolauri E. Prospective, controlled, multi-center study on the effect of an amino-acid-based formula in infants with cow's milk allergy/intolerance and atopic dermatitis. *Pediatr Allergy Immunol* 2001;12(2):78-82.
41. Payot F, Lachaux A, Lalanne F, Kalach N. Randomized trial of a yogurt-type amino acid-based formula in infants and children with severe cow's milk allergy. *J Pediatr Gastroenterol Nutr* 2018;66(1):135-140.
42. Hill DJ, Cameron DJ, Francis DE, Gonzalez-Andaya AM, Hosking CS. Challenge confirmation of late-onset reactions to extensively hydrolyzed formulas in infants with multiple food protein intolerance. *J Allergy Clin Immunol* 1995;96(3):386-394.
43. Canani RB, Nocerino R, Frediani T, Lucarelli S, Di Scala C, Varin E, Leone L, Muraro A, Agostoni C. Amino acid-based formula in cow's milk allergy: long-term effects on body growth and protein metabolism. *J Pediatr Gastroenterol Nutr* 2017;64(4):632-638.
44. Isolauri E, Sütas Y, Mäkinen-Kiljunen S, Oja SS, Isosomppi R, Turjanmaa K. Efficacy and safety of hydrolyzed cow milk and amino acid-derived formulas in infants with cow milk allergy. *J Pediatr* 1995;127(4):550-557.
45. Niggemann B, Binder C, Dupont C, Hadji S, Arvola T, Isolauri E. Prospective, controlled, multi-center study on the effect of an amino-acid-based formula in infants with cow's milk allergy/intolerance and atopic dermatitis. *Pediatr Allergy Immunol* 2001;12(2):78-82.
46. Vandenplas Y, Steenhout P, Planoudis Y, Grathwohl, Althera Study Group: Treating cow's milk protein allergy: a double-blind randomized trial comparing two extensively hydrolyzed formulas with probiotics. *Acta Paediatr.* 2013 Oct;102(10):990-998.
47. Niggemann B, von Berg A, Bollrath C, et al. Safety and efficacy of a new extensively hydrolyzed formula for infants with cow's milk protein allergy. *Pediatr Allergy Immunol.* 2008;19(4):348-354.
48. Terheggen-Lagro SW, Khouw IM, Schaafsma A, Wauters EA. Safety of a new extensively hydrolyzed formula in children with cow's milk protein allergy: a double blind crossover study. *BMC Pediatr* 2002;2:10.
49. Chatchatee P, Nowak-Węgrzyn A, Lange L, Benjaponpitak S, Chong KW, Sangsupawanich P, et al. Tolerance development in cow's milk-allergic infants receiving amino acid-based formula: A randomized controlled trial. *J Allergy Clin Immunol.* 2022;149(2):650-658.e5.
50. Meyer R, Groetch M, Venter C. When should infants with cow's milk protein allergy use an amino acid formula? a practical guide. *J Allergy Clin Immunol Pract* 2018;6(2):383-399.
51. Caffarelli C, Plebani A, Poiesi C, Petroccione T, Spattini A, Cavagni G. Determination of allergenicity to three cow's milk hydrolysates and an amino acid-derived formula in children with cow's milk allergy. *Clin Exp All* 2002;32:74-79.

52. Egan M, Lee T, Andrade J, Grishina G, Mishoe M, Gimenez G, Sampson HA, Bunyavanich S. Partially hydrolyzed whey formula intolerance in cow's milk allergic patients. *Pediatr Allergy Immunol* 2017;28(4):401-405.
53. Høst A, Halcken S. Hypoallergenic formulas--when, to whom and how long: after more than 15 years we know the right indication! *Allergy* 2004;59 Suppl 78:45-52.
54. Niggemann B, Binder C, Klettke U, Wahn U. In vivo and in vitro studies on the residual allergenicity of partially hydrolyzed infant formulae. *Acta Paediatr* 1999;88(4):394-8.
55. Inuo C, Tanaka K, Nakajima Y, Yamawaki K, Matsubara T, Iwamoto H, Tsuge I, Urisu A, Kondo Y. Tolerability of partially and extensively hydrolyzed milk formulas in children with cow's milk allergy. *Asia Pac J Clin Nutr* 2019;28(1):49-56.
56. Vita D, Passalacqua G, Di Pasquale G, Caminiti L, Crisafulli G, Rulli I, Pajno GB. Ass's milk in children with atopic dermatitis and cow's milk allergy: crossover comparison with goat's milk. *Pediatr Allergy Immunol* 2007;18(7):594-598.
57. Järvinen KM, Chatchatee P. Mammalian milk allergy: clinical suspicion, cross-reactivities and diagnosis. *Curr Opin Allergy Clin Immunol* 2009;9(3):251-258.
58. Ehlal M, Bener A, Hazeima KA, Al-Mesaifri F. *International Scholarly Research Notices* 2011; 391641, 5 pages.
59. Bellioni-Businco B, Paganelli R, Lucenti P, Giampietro PG, Perborn H, Businco L. Allergenicity of goat's milk in children with cow's milk allergy. *J Allergy Clinical Immunology* 1999;103(6):1191-4.
60. Pessler F, Nejat M. Anaphylactic reaction to goat's milk in a cow's milk-allergic infant. *Pediatric Allergy and Immunology*. 2004;15(2):183-5.62.
61. Rodriguez del Rio P, Sánchez-García S, Escudero C, Pastor-Vargas C, Sánchez Hernández JJ, Pérez-Rangel I, Ibáñez MD. Allergy to goat's and sheep's milk in a population of cow's milk-allergic children treated with oral immunotherapy. *Ped Allergy Immunology*. 2012;23(2):128-32.
62. Klemola R, Vanto T, Juntunen-Backman K, Kalimo K, Korpela R, Varjonen E. Allergy to soy formula and to extensively hydrolyzed whey formula in infants with cow's milk allergy: A prospective, randomized study with a follow-up to the age of 2 years. *J Pediatr* 2002;140:219-224.
63. Salpietro CD, Gangemi S, Briuglia S, Meo A, Merlino MV, Muscolino G, Bisignano G, Trombetta D, Saija A. The almond milk: a new approach to the management of cow-milk allergy/intolerance in in-fants. *Minerva Pediatr*. 2005;57(4):173-180.
64. Seppo L, Korpela R, Lönnerdal B, Metsäniitty L, Juntunen-Backman K, Klemola T, Paganus A, Vanto T: A follow-up study of nutrient intake, nutritional status, and growth in infants with cow milk allergy fed either a soy formula or an extensively hydrolyzed whey formula. *Am J Clin Nutr* 2005;82(1):140-145.
65. Jirapinyo P, Densupsoontorn N, Wongarn R, Thamonsiri N. Comparisons of a chicken-based formula with soy-based formula in infants with cow milk allergy. *Asia Pac J Clin Nutr* 2007;16(4):711-715.
66. Hill DJ, Cameron DJ, Francis DE, Gonzalez-Andaya AM, Hosking CS. Challenge confirmation of late-onset reactions to extensively hydrolyzed formulas in infants with multiple food protein intolerance. *J Allergy Clin Immunol* 1995;96(3):386-394.
67. Berni Canani R, Nocerino R, Terrin G, Frediani T, Lucarelli S, Cosenza L, Passariello A, Leone L, Granata V, Di Costanzo M, Pezzella V, Troncone R. Formula selection for management of children with cow's milk allergy influences the rate of acquisition of tolerance: a prospective multicenter study. *Pediatr* 2013;163(3):771-7.e1.
68. Terracciano L, Bouygue GR, Sarratud T, Veglia F, Martelli A, Fiocchi A. Impact of dietary regimen on the duration of cow's milk allergy: a random allocation study. *Clin Exp Allergy* 2010;40(4):637-42.
69. Reche M, Pascual C, Fiandor A, Polanco I, Rivero-Urgell M, Chifre R, Johnston S, Martín-Esteban M. The effect of a partially hydrolyzed formula based on rice protein in the treatment of infants with cow's milk protein allergy. *Pediatr Allergy Immunol* 2010;21:577-585.



70. Salpietro CD, Gangemi S, Briuglia S, Meo A, Merlino MV, Muscolino G, Bisignano G, Trombetta D, Saija A. The almond milk: a new approach to the management of cow-milk allergy/intolerance in in-fants. *Minerva Pediatr.* 2005;57(4):173-180.
71. Merritt RJ, Fleet SE, Fifi A, Jump C, Schwartz S, Sentongo T, Duro D, Rudolph J, Turner J; NASPGHAN Committee on Nutrition. North American Society for Pediatric Gastroenterology, Hepatology, and Nutrition Position Paper: Plant-based Milks. *J Pediatr Gastroenterol Nutr* 2020;71(2):276-281.
72. Verduci E, Di Profio E, Cerrato L, Nuzzi G, Riva L, Vizzari G, D'Auria E, Gianni ML, Zuccotti G, Peroni DG. Use of soy-based formulas and cow's milk allergy: lights and shadows. *Frontiers in Pediatrics.* 2020:736.
73. ESPGHAN Committee on Nutrition, Agostoni C, Axelsson I, Goulet O, Koletzko B, Michaelsen KF, Puntis J, Rieu D, Rigo J, Shamir R, Szajewska H, Turck D. Soy protein infant formulae and follow-on formulae: a commentary by the ESPGHAN Committee on Nutrition. *J Pediatr Gastroenterol Nutr.* 2006;42(4):352-561.
74. Klemola R, Vanto T, Juntunen-Backman K, Kalimo K, Korpela R, Varjonen E. Allergy to soy formula and to extensively hydrolyzed whey formula in infants with cow's milk allergy: A prospective, randomized study with a follow-up to the age of 2 years. *J Pediatr* 2002;140:219-224.
75. Klemola T, Kalimo K, Poussa T, Juntunen-Blackman K, Korpela R, Valovirta E, Vanto T. Feeding a soy formula to children with cow's milk allergy: The development of immunoglobulin E-mediated allergy to soy and peanuts. *Pediatr Allergy Immunol* 2005;16: 641-646.
76. Savino F, Castagno E, Monti G, Serraino P, Peltran A, Oggero R, Fanaro S, Vigi V, Silvestro L. Z-score of weight for age of infants with atopic dermatitis and cow's milk allergy fed with a rice-hydrolysate formula during the first two years of life. *Acta Paediatr Suppl* 2005;94(449):115-119.
77. Agostoni C, Fiocchi A, Riva E, Terracciano L, Sarratud T, Martelli A, Lodi F, D'Auria E, Zuccotti G, Giovannini M. Growth of infants with IgE-mediated cow's milk allergy fed different formulas in the complementary feeding period. *Pediatr Allergy Immunol* 2007;18(7):599-606.
78. Signes-Pastor AJ, Deacon C, Jenkins RO, Haris PI, Carbonell-Barrachina AA, Meharg AA. Arsenic speciation in Japanese rice drinks and condiments. *J Environ Monit* 2009;11(11):1930-1934.
79. Jirapinyo P, Densupsoontorn N, Wongarn R, Thamonsiri N. Comparisons of a chicken-based formula with soy-based formula in infants with cow milk allergy. *Asia Pac J Clin Nutr* 2007;16(4):711-715.
80. Jirapinyo P, Densupsoontorn N, Kangwanpornsiri C, Wongarn R. Chicken-based formula is better tolerated than extensively hydrolyzed casein formula for the management of cow milk protein allergy in infants. *Asia Pac J Clin Nutr* 2012;21(2):209-214.
81. Cantani A. A home-made meat-based formula for feeding atopic babies: a study in 51 children. *Eur Rev Med Pharmacol Sci* 2006;10(2):61-68.
82. Ivakhnenko O, Niankovskyy S. Clinical effectiveness of probiotics in complex treatment of infants with cow's milk allergy. *Georgian Med News* 2013;(216):39-45.
83. Sistek D, Kelly R, Wickens K, Stanley T, Fitzharris P, Crane J. Is the effect of probiotics on atopic dermatitis confined to food sensitized children? *Clin Exp Allergy* 2006;36(5):629-633.
84. Viljanen M, Savilahti E, Haahtela T, Juntunen-Backman K, Korpela R, Poussa T, Tuure T, Kuitunen M. Probiotics in the treatment of atopic eczema/dermatitis syndrome in infants: a double-blind placebo-controlled trial. *Allergy* 2005;60(4):494-500.
85. Helin T, Haahtela S, Haahtela T. No effect of oral treatment with an intestinal bacterial strain, *Lactobacillus rhamnosus* (ATCC 53103), on birch-pollen allergy: a placebo-controlled double-blind study. *Allergy* 2002;57(3):243-246.
86. Flinterman AE, Knol EF, van Ieperen-van Dijk AG, Timmerman HM, Knulst AC, Bruijnzeel-Koomen CA, Pasmans SG, van Hoffen E. Probiotics have a different immunomodulatory potential in vitro versus ex vivo upon oral administration in children with food allergy. *Int Arch Allergy Immunol* 2007;143(3):237-44.

87. Berni Canani R, Nocerino R, Terrin G, Coruzzo A, Cosenza L, Leone L, Troncone R. Effect of *Lactobacillus* GG on tolerance acquisition in infants with cow's milk allergy: a randomized trial. *J Allergy Clin Immunol* 2012;129(2): e581–585.
88. Berni Canani R, Di Costanzo M, Bedogni G, Amoroso A, Cosenza L, Di Scala C, Granata V, Nocerino R. Extensively hydrolyzed casein formula containing *Lactobacillus rhamnosus* GG reduces the occurrence of other allergic manifestations in children with cow's milk allergy: 3-year randomized controlled trial. *J Allergy Clin Immunol* 2017;139(6):1906-1913.e4.
89. Berni Canani R, Nocerino R, Terrin G, Frediani T, Lucarelli S, Cosenza L, Passariello A, Leone L, Granata V, Di Costanzo M, Pezzella V, Troncone R. Formula selection for management of children with cow's milk allergy influences the rate of acquisition of tolerance: a prospective multicenter study. *Pediatr* 2013;163(3):771-777.e1.
90. Kirjavainen PV, Salminen SJ, Isolauri E. Probiotic bacteria in the management of atopic disease: underscoring the importance of viability. *J Pediatr Gastroenterol Nutr* 2003;36(2):223-227.
91. Majamaa H, Isolauri E. Probiotics: a novel approach in the management of food allergy. *J Allergy Clin Immunol* 1997;99(2):179-185.
92. Brouwer ML, Wolt-Plompen SA, Dubois AE, van der Heide S, Jansen DF, Hoijer MA, Kauffman HF, Duiverman EJ. No effects of probiotics on atopic dermatitis in infancy: a randomized placebo-controlled trial. *Clin Exp Allergy* 2006;36(7):899-906.
93. Vandenas Y, Steenhout P, Planoudis Y, Grathwohl D. Treating cow's milk protein allergy: a double-blind randomized trial comparing two extensively hydrolyzed formulas with probiotics. *Acta Paediatr* 2013;102(10):990-998.
94. Dupont C, Hol J, Nieuwenhuis EE; Cow's Milk Allergy Modified by Elimination and *Lactobacilli* study group. An extensively hydrolyzed casein-based formula for infants with cow's milk protein allergy: tolerance/hypo-allergenicity and growth catch-up. *Br J Nutr* 2015;113(7):1102-1012.
95. Nowak-Wegrzyn, A.; Czerkies, L.; Reyes, K et al. Confirmed Hypoallergenicity of a Novel Whey-Based Extensively Hydrolyzed Infant Formula Containing Two Human Milk Oligosaccharides. *Nutrients* 2019, 11, 1447.
96. Burks AW, Harthorn LF, Van Ampting MT, Oude Nijhuis MM, Langford JE, Wopereis H, Goldberg SB, Ong PY, Essink BJ, Scott RB, Harvey BM. Synbiotics-supplemented amino acid-based formula supports adequate growth in cow's milk allergic infants. *Pediatr Allergy Immunol* 2015;26(4):316-322.
97. de Silva D, Rodríguez del Río P, de Jong NW, Khaleva E, Singh C, Nowak-Wegrzyn A, et al. Allergen immunotherapy and/or biologicals for IgE-mediated food allergy: systematic review and meta-analysis. *Allergy* 2022, in press.
98. Cao S, Borro M, Alonzi S, Sindher S, Nadeau K, Chinthrajah RS. Improvement in health-related quality of life in food-allergic patients: a meta-analysis. *The Journal of Allergy and Clinical Immunology: In Practice*. 2021;9(10):3705-14.
99. Wasserman RL, Jones DH, Windom HH, Bajowala SS, Carr WW, Chacko T, et al. Reaching for best practices in food oral immunotherapy: report on the second annual Food Allergy Support Team meeting. *Annals of Allergy, Asthma & Immunology*. 2019;123(2):129-30.
100. Goldberg MR, Nachshon L, Levy MB, Elizur A, Katz Y. Risk factors and treatment outcomes for oral immunotherapy–induced gastrointestinal symptoms and eosinophilic responses (OITIGER). *The Journal of Allergy and Clinical Immunology: In Practice*. 2020;8(1):125-31.
101. Hourihane JO, Beyer K, Abbas A, Fernández-Rivas M, Turner PJ, Blumchen K, et al. Efficacy and safety of oral immunotherapy with AR101 in European children with a peanut allergy (ARTEMIS): a multicentre, double-blind, randomised, placebo-controlled phase 3 trial. *The Lancet Child & Adolescent Health*. 2020;4(10):728-39.
102. Fauquert JL, Michaud E, Pereira B, Bernard L, Gourdon-Dubois N, Rouzair PO, et al. Peanut gastrointestinal delivery oral immunotherapy in adolescents: results of the build-up phase of a randomized, double-blind, placebo-controlled trial (PITA study). *Clinical & Experimental Allergy*. 2018;48(7):862-74.

103. Blumchen K, Trendelenburg V, Ahrens F, Gruebl A, Hamelmann E, Hansen G, et al. Efficacy, safety, and quality of life in a multicenter, randomized, placebo-controlled trial of low-dose peanut oral immunotherapy in children with peanut allergy. *J Allergy Clinical Immunology: In Practice*. 2019;7(2):479-91.
104. Vickery BP, Vereda A, Casale TB, et al. AR101 oral immunotherapy for peanut allergy. *N Engl J Med*. 2018;379(21):1991-2001.
105. Remington BC, Krone T, Koppelman SJ. Quantitative risk reduction through peanut immunotherapy: safety benefits of an increased threshold in Europe. *Pediatric Allergy and Immunology*. 2018;29(7):762-72.
106. Dunn Galvin A, Hourihane JB. Psychosocial mediators of change and patient selection factors in oral immunotherapy trials. *Clinical reviews in allergy & immunology*. 2018;55(2):217-36.
107. Anagnostou K, Islam S, King Y, Foley L, Pasea L, Bond S, Palmer C, Deighton J, Ewan P, Clark A. Assessing the efficacy of oral immunotherapy for the desensitisation of peanut allergy in children (STOP II): a phase 2 randomised controlled trial. *The Lancet*. 2014;383(9925):1297-304.
108. Afinogenova Y, Rubin TN, Patel SD, Powell RL, Gilo JM, Denno MN, Soffer G, Lee JO, Mendelson LM, Factor JM. Community private practice clinical experience with peanut oral immunotherapy. *The Journal of Allergy and Clinical Immunology: In Practice*. 2020;8(8):2727-35.
109. Vázquez-Cortés S, Jaqueti P, Arasi S, Machinena A, Alvaro-Lozano M, Fernández-Rivas M. Safety of food oral immunotherapy: what we know, and what we need to learn. *Immunology and Allergy Clinics*. 2020;40(1):111-33.
110. Rodriguez del Rio P, Alvarez-Perea A, Blumchen K, Caimmi D, Caubet JC, Konstantinopoulos AP, et al. Food immunotherapy practice: Nation differences across Europe, The FIND project. *Allergy*. 2022;77(3):920-32.
111. Patel N, Vazquez-Ortiz M, Turner PJ. Risk factors for adverse reactions during OIT. *Current Treatment Options in Allergy*. 2019;6(2):164-74.
112. Shaker M, Greenhawt M. Estimation of health and economic benefits of commercial peanut immunotherapy products: a cost-effectiveness analysis. *JAMA network open*. 2019;2(5):e193242-.
113. Fleischer DM, Greenhawt M, Sussman G, Bégin P, Nowak-Wegrzyn A, Petroni D, et al. Effect of epicutaneous immunotherapy vs placebo on reaction to peanut protein ingestion among children with peanut allergy: the PEPITES randomized clinical trial. *JAMA*. 2019;321(10):946-55.
114. Dello Iacono I, Tripodi S, Calvani M, Panetta V, Verga MC, Miceli Sopo S. Specific oral tolerance induction with raw hen's egg in children with very severe egg allergy: a randomized controlled trial. *Pediatric allergy and immunology*. 2013;24(1):66-74.
115. Vazquez-Ortiz M, Alvaro M, Piquer M, Giner MT, Dominguez O, Lozano J, et al. Life-threatening anaphylaxis to egg and milk oral immunotherapy in asthmatic teenagers. *Annals of Allergy, Asthma & Immunology*. 2014;113(4):482-4.
116. Garcia Rodriguez R, Urra JM, Feo-Brito F, Galindo PA, Borja J, Gomez E, et al. Oral rush desensitization to egg: efficacy and safety. *Clinical & Experimental Allergy*. 2011;41(9):1289-96.
117. Ojeda P, Ojeda I, Rubio G, Pineda F. Home-based oral immunotherapy protocol with pasteurized egg for children allergic to hen's egg. *IMAJ-Israel Medical Association Journal*. 2012;14(1):34.
118. Meglio P, Giampietro PG, Carello R, Gabriele I, Avitabile S, Galli E. Oral food desensitization in children with IgE-mediated hen's egg allergy: a new protocol with raw hen's egg. *Pediatric allergy and immunology*. 2013;24(1):75-83.
119. Echeverria-Zudaire LA, Fernandez-Fernandez S, Rayo-Fernandez A, Munoz-Archidona C, Checa-Rodriguez R. Primary eosinophilic gastrointestinal disorders in children who have received food oral immunotherapy. *Allergologia et Immunopathologia*. 2016;44(6):531-6.

120. Torrijos EG, Díaz YM, Lozano LM, Ortega AE, Segade JB, Brito JF, Sánchez JR, Rodríguez RG. Frequency and course of eosinophilic esophagitis during oral immunotherapy for cow's milk allergy in a series of 57 children. *Journal of investigational allergology & clinical immunology*. 2017;27(2):132-3.
121. Jones SM, Sicherer SH, Burks AW, Leung DY, Lindblad RW, Dawson P, Henning AK, Berin MC, Chiang D, Vickery BP, Pesek RD. Epicutaneous immunotherapy for the treatment of peanut allergy in children and young adults. *Journal of Allergy and Clinical Immunology*. 2017;139(4):1242-52.
122. Sampson HA, Shreffler WG, Yang WH, Sussman GL, Brown-Whitehorn TF, Nadeau KC, et al. Effect of varying doses of epicutaneous immunotherapy vs placebo on reaction to peanut protein exposure among patients with peanut sensitivity: a randomized clinical trial. *JAMA*. 2017;318(18):1798-809.
123. Oppenheimer JJ, Nelson HS, Bock SA, Christensen F, Leung DY. Treatment of peanut allergy with rush immunotherapy. *Journal of Allergy and Clinical Immunology*. 1992;90(2):256-62.
124. Nelson HS, Lahr J, Rule R, Bock A, Leung D. Treatment of anaphylactic sensitivity to peanuts by immunotherapy with injections of aqueous peanut extract. *Journal of Allergy and Clinical Immunology*. 1997;99(6):744-51.
125. Dupont C, Kalach N, Soulaïnes P, Legoué-Morillon S, Piloquet H, Benhamou PH. Cow's milk epicutaneous immunotherapy in children: a pilot trial of safety, acceptability, and impact on allergic reactivity. *Journal of Allergy and Clinical Immunology*. 2010;125(5):1165-7.
126. Nowak-Węgrzyn A, Wood RA, Nadeau KC, Pongracic JA, Henning AK, Lindblad RW, Beyer K, Sampson HA. Multicenter, randomized, double-blind, placebo-controlled clinical trial of vital wheat gluten oral immunotherapy. *Journal of Allergy and Clinical Immunology*. 2019;143(2):651-61.
127. Enrique E, Pineda F, Malek T, Bartra J, Basagaña M, Tella R, et al. Sublingual immunotherapy for hazelnut food allergy: a randomized, double-blind, placebo-controlled study with a standardized hazelnut extract. *Journal of allergy and clinical immunology*. 2005;116(5):1073-9.
128. Fernandez-Rivas M, Garrido Fernandez S, Nadal JA, Alonso Díaz de Durana MD, Garcia BE, et al. Randomized double-blind, placebo-controlled trial of sublingual immunotherapy with a Pru p 3 quantified peach extract. *Allergy*. 2009;64(6):876-83.
129. Sampson HA, Leung DY, Burks AW, Lack G, Bahna SL, Jones SM, Wong DA. A phase II, randomized, double-blind, parallel-group, placebo-controlled oral food challenge trial of Xolair (omalizumab) in peanut allergy. *J Allergy Clin Immunol* 2011;127(5):1309-1310.
130. Arasi S, Mennini M, Cafarotti A, Fiocchi A. Omalizumab as monotherapy for food allergy. *Curr Opin Allergy Clin Immunol* 2021;21(3):286-291.
131. Fiocchi A, et al. Impact of omalizumab on food allergy in patients treated for asthma: a real-life study. *J Allergy Clin Immunol Pract* 2019;7(6):1901-1909.e5.
132. Chinthrajah S, Cao S, Liu C, Lyu SC, Sindher SB, Long A, Sampath V, Petroni D, Londei M, Nadeau KC. Phase 2a randomized, placebo-controlled study of anti-IL-33 in peanut allergy. *JCI insight* 2019;4(22).
133. Leung DY, Sampson HA, Yunginger JW, Burks Jr AW, Schneider LC, Wortel CH, Davis FM, Hyun JD, Shanahan Jr WR. Effect of anti-IgE therapy in patients with peanut allergy. *NEJM* 2003;348(11):986-993.
134. Norman M, South C, Quinn P, Chan D, Palmer S, Netting M, Gold M. Does providing written dietary advice improve the ingestion of non-allergic nuts in children with existing nut allergies? A randomized controlled trial. *Clin Exp Allergy* 2016;46(5):741-748.
135. Boyle RJ, Umasunthar T, Smith JG, Hanna H, Procktor A, Phillips K, Pinto C, Gore C, Cox HE, Warner JO, Vickers B, Hodes M. A brief psychological intervention for mothers of children with food allergy can change risk perception and reduce anxiety: Outcomes of a randomized controlled trial. *Clin Exp Allergy* 2017;47(10):1309-1317.

136. Howe LC, Leibowitz KA, Perry MA, Bitler JM, Block W, Kaptchuk TJ, Nadeau KC, Crum AJ. Changing patient mindsets about non-life-threatening symptoms during oral immunotherapy: a randomized clinical trial. *J Allergy Clin Immunol Pract* 2019;7(5):1550-1559.
137. Brockow K, Schallmayer S, Beyer K, Biedermann T, Fischer J, Gebert N, et al. Effects of a structured educational intervention on knowledge and emergency management in patients at risk for anaphylaxis. *Allergy* 2015;70(2):227-235.
138. Shemesh E, D'Urso C, Knight C, Rubes M, Picerno KM, Posillico AM, et al. Food-allergic adolescents at risk for anaphylaxis: a randomized controlled study of supervised injection to improve comfort with epinephrine self-injection. *J Allergy Clin Immunol Pract* 2017;5(2):391-397.e4.
139. Weinberger T, Annunziato R, Riklin E, Shemesh E, Sicherer SH. A randomized controlled trial to reduce food allergy anxiety about casual exposure by holding the allergen: TOUCH study. *J Allergy Clin Immunol Pract* 2019;7(6):2039-2042.e14.
140. Sugunasingha N, Jones FW, Jones CJ. Interventions for caregivers of children with food allergy: A systematic review. *Pediatr Allergy Immunol*. 2020 Oct;31(7):805-812.
141. Jiang J, Gallagher JL, Szkodon JW, Syed M, Gobin KS, Gupta RS, Bilaver LA. The development and evaluation of peer food allergy education videos for school-age youth. *Ann Allergy Asthma Immunol* 2019;123(1):107-108.
142. Viana LV, Gomes MB, Zajdenverg L, Pavin EJ, Azevedo MJ. Brazilian Type 1 Diabetes Study Group (2016). Interventions to improve patients' compliance with therapies aimed at lowering glycated hemoglobin (HbA1c) in type 1 diabetes: systematic review and meta-analyses of randomized controlled clinical trials of psychological, telecare, and educational interventions. *Trials* 2016;17:94.
143. Klainin-Yobas P, Ng SH, Stephen PD, Lau Y. Efficacy of psychosocial interventions on psychological outcomes among people with cardiovascular diseases: a systematic review and meta-analysis. *Patient Educ Couns* 2016;99:512-521.
144. Reddy K, Kearns M, Alvarez-Arango S, Carrillo-Martin I, Cuervo-Pardo N, Cuervo-Pardo L, Dimov V, Lang DM, Lopez-Alvarez S, Schroer B, Mohan K, Dula M, Zheng S, Kozinetz C, Gonzalez-Estrada A. YouTube and food allergy: An appraisal of the educational quality of information. *Pediatr Allergy Immunol* 2018;29(4):410-416.
145. Mandracchia F, Llauroadó E, Tarro L, Valls RM, Solà R. Mobile phone apps for food allergies or intolerances in app stores: systematic search and quality assessment using the Mobile App Rating Scale (MARS). *JMIR Mhealth Uhealth* 2020;8(9):e18339.
146. Kastner M, Harada L, Wasserman S. Gaps in anaphylaxis management at the level of physicians, patients, and the community: a systematic review of the literature. *Allergy* 2010;65(4):435-444.
147. Xu YS, Wasserman SB, Wasserman S, Connors L, Stawiarski K, Kastner M. Food allergy management from the perspective of patients or caregivers, and allergists: a qualitative study. *Allergy Asthma Clin Immunol* 2010;6(1):30.
148. Flaherty MG, Threats M, Kaplan SJ. Patients' health information practices and perceptions of provider knowledge in the case of the newly discovered alpha-gal food allergy. *J Patient Exp* 2020;7(1):132-139.
149. Abdurrahman ZB, Kastner M, Wurman C, Harada L, Bantock L, Cruickshank H, Wasserman S. Experiencing a first food allergic reaction: a survey of parent and caregiver perspectives. *Allergy Asthma Clin Immunol* 2013;9(1):18.
150. Mahoney B, Walklet E, Bradley E, O'Hickey S. Improving adrenaline autoinjector adherence: A psychologically informed training for healthcare professionals. *Immun Inflamm Dis* 2019;7(3):214-228.
151. Tsuang A, Atal Z, Demain H, Patrick K, Pistiner M, Wang J. Benefits of school nurse training sessions for food allergy and anaphylaxis management. *J Allergy Clin Immunol Pract* 2019;7(1):309-311.e2.
152. Canon N, Gharfeh M, Guffey D, Anvari S, Davis CM. Role of food allergy education: measuring teacher knowledge, attitudes, and beliefs. *Allergy Rhinol* 2019;10:2152656719856324.

153. Jain PD, Gupta RS, Chadha AS, Warren CM, Rao VV, Putcha UK. Knowledge, attitude, and practices of medical clinicians regarding food allergy and anaphylaxis in Hyderabad, India. *Ann Allergy Asthma Immunol* 2020;125(5):560-564.
154. Gupta RS, Springston EE, Kim JS, Smith B, Pongracic JA, Wang X, Holl J. Food allergy knowledge, attitudes, and beliefs of primary care physicians. *Pediatrics* 2010;125(1):126-32.
155. Turner PJ, Gowland MH, Sharma V, Ierodiakonou D, Harper N, Garcez T, et al. Increase in anaphylaxis-related hospitalizations but no increase in fatalities: an analysis of United Kingdom national anaphylaxis data, 1992-2012. *J Allergy Clin Immunol*. 2015 Apr;135(4):956-963.e1.
156. Mullins RJ, Wainstein BK, Barnes EH, Liew WK, Campbell DE. Increases in anaphylaxis fatalities in Australia from 1997 to 2013. *Clin Exp Allergy*. 2016 Aug;46(8):1099-110.
157. Pouessel G, Beaudouin E, Tanno LK, Drouet M, Deschildre A, Labreuche J, et al; Allergy Vigilance Network®. Food-related anaphylaxis fatalities: Analysis of the Allergy Vigilance Network® database. *Allergy*. 2019 Jun;74(6):1193-1196.
158. Ramsey NB, Guffey D, Anagnostou K, Coleman NE, Davis CM. Epidemiology of Anaphylaxis in Critically Ill Children in the United States and Canada. *J Allergy Clin Immunol Pract*. 2019 Sep-Oct;7(7):2241-2249.
159. Deschildre A, Elegbédé CF, Just J, Bruyère O, Van der Brempt X, Papadopoulos A, et al. Peanut-allergic patients in the MIRABEL survey: characteristics, allergists' dietary advice and lessons from real life. *Clin Exp Allergy*. 2016 Apr;46(4):610-20.
160. Yanagida N, Sato S, Asaumi T, Ogura K, Ebisawa M. Risk Factors for Severe Reactions during Double-Blind Placebo-Controlled Food Challenges. *Int Arch Allergy Immunol*. 2017;172(3):173-182.
161. van Erp FC, Knulst AC, Kentie PA, Pasmans SG, van der Ent CK, Meijer Y. Can we predict severe reactions during peanut challenges in children? *Pediatr Allergy Immunol*. 2013 Sep;24(6):596-602.
162. Roberts G, Vazquez-Ortiz M, Knibb R, Khaleva E, Alviani C, Angier E, et al. EAACI Guidelines on the effective transition of adolescents and young adults with allergy and asthma. *Allergy*. 2020;75(11):2734-52.
163. Calvani M, Cardinale F, Martelli A, Muraro A, Pucci N, Savino F, et al; Italian Society of Pediatric Allergy and Immunology Anaphylaxis' Study Group. Risk factors for severe pediatric food anaphylaxis in Italy. *Pediatr Allergy Immunol*. 2011 Dec;22(8):813-9.
164. Purington N, Chinthrajah RS, Long A, Sindher S, Andorf S, O'Laughlin K, et al. Eliciting Dose and Safety Outcomes From a Large Dataset of Standardized Multiple Food Challenges. *Front Immunol*. 2018 Sep 21;9:2057.
165. Francuzik W, Dölle-Bierke S, Knop M, Scherer Hofmeier K, Cichocka-Jarosz E, García BE, et al. Refractory Anaphylaxis: Data From the European Anaphylaxis Registry. *Front Immunol*. 2019 Oct 18;10:2482.
166. Olabarri M, Vazquez P, Gonzalez-Posada A, Sanz N, Gonzalez-Peris S, Diez N, et al. Risk Factors for Severe Anaphylaxis in Children. *J Pediatr*. 2020 Oct;225:193-197.e5
167. Kennedy K, Alfaro MKC, Spergel ZC, Dorris SL, Spergel JM, Capucilli P. Differences in oral food challenge reaction severity based on increasing age in a pediatric population. *Ann Allergy Asthma Immunol*. 2021 May 16:S1081-1206(21)00360-4.
168. Motosue MS, Bellolio MF, Van Houten HK, Shah ND, Campbell RL. Risk factors for severe anaphylaxis in the United States. *Ann Allergy Asthma Immunol*. 2017 Oct;119(4):356-361.e2.
169. Worm M, Francuzik W, Renaudin JM, Bilo MB, Cardona V, Scherer Hofmeier K, et al. Factors increasing the risk for a severe reaction in anaphylaxis: An analysis of data from The European Anaphylaxis Registry. *Allergy*. 2018 Jun;73(6):1322-1330.
170. Reier-Nilsen T, Michelsen MM, Lødrup Carlsen KC, Carlsen KH, Mowinckel P, Nygaard UC, et al. Predicting reactivity threshold in children with anaphylaxis to peanut. *Clin Exp Allergy*. 2018 Apr;48(4):415-423.
171. Versluis A, van Os-Medendorp H, Blom WM, Michelsen-Huisman AD, Castenmiller JJM, Noteborn HPJM, et al. Potential cofactors in accidental food allergic reactions are frequently

- present but may not influence severity and occurrence. *Clin Exp Allergy*. 2019 Feb;49(2):207-215.
172. Maris I, Dölle-Bierke S, Renaudin JM, Lange L, Koehli A, Spindler T, et al; Network for Online Registration of Anaphylaxis (NORA). Peanut-induced anaphylaxis in children and adolescents: Data from the European Anaphylaxis Registry. *Allergy*. 2021 May;76(5):1517-1527.
173. Tejedor-Alonso MA, Farias-Aquino E, Pérez-Fernández E, Moro-Moro M, Rosado-Ingelmo A, Alberti Masgrau N, et al. Association Between Severity of Anaphylaxis and Co-occurrence of Respiratory Diseases: A Systematic Review and Meta-analysis of Observational Studies. *J Investig Allergol Clin Immunol*. 2021 Apr 20;31(2):132-144.
174. Pettersson ME, Koppelman GH, Flokstra-de Blok BMJ, Kollen BJ, Dubois AEJ. Prediction of the severity of allergic reactions to foods. *Allergy*. 2018 Jul;73(7):1532-1540.
175. Taylor SL, Moneret-Vautrin DA, Crevel RW, Sheffield D, Morisset M, Dumont P, et al. Threshold dose for peanut: Risk characterization based upon diagnostic oral challenge of a series of 286 peanut-allergic individuals. *Food Chem Toxicol*. 2010 Mar;48(3):814-9.
176. Turner PJ, Baumert JL, Beyer K, Boyle RJ, Chan CH, Clark AT, Crevel RW, DunnGalvin A, Fernández-Rivas M, Gowland MH, Grabenhenrich L. Can we identify patients at risk of life-threatening allergic reactions to food?. *Allergy*. 2016;71(9):1241-55.
177. Arkwright PD, MacMahon J, Koplin J, Rajput S, Cross S, Fitzsimons R, et al. Severity and threshold of peanut reactivity during hospital-based open oral food challenges: An international multicenter survey. *Pediatr Allergy Immunol*. 2018 Nov;29(7):754-761.
178. Kim M, Ahn Y, Yoo Y, Kim DK, Yang HJ, Park HS, Lee HJ, Kim MA, Jeong YY, Kim BS, Bae WY. Clinical manifestations and risk factors of anaphylaxis in pollen-food allergy syndrome. *Yonsei medical journal*. 2019;60(10):960-8.
179. Eller E, Bindslev-Jensen C. Clinical value of component-resolved diagnostics in peanut-allergic patients. *Allergy*. 2013 Feb;68(2):190-4.
180. Klemans RJ, Broekman HC, Knol EF, Bruijnzeel-Koomen CA, Otten HG, Pasmans SG, et al. Ara h 2 is the best predictor for peanut allergy in adults. *J Allergy Clin Immunol Pract*. 2013 Nov-Dec;1(6):632-8.e1.
181. Kukkonen AK, Pelkonen AS, Mäkinen-Kiljunen S, Voutilainen H, Mäkelä MJ. Ara h 2 and Ara 6 are the best predictors of severe peanut allergy: a double-blind placebo-controlled study. *Allergy*. 2015 Oct;70(10):1239-45.
182. Petersen TH, Mortz CG, Bindslev-Jensen C, Eller E. Cow's milk allergic children—Can component-resolved diagnostics predict duration and severity?. *Pediatric Allergy and Immunology*. 2018;29(2):194-9.
183. Datema MR, Eller E, Zwinderman AH, Poulsen LK, Versteeg SA, van Ree R, et al. Ratios of specific IgG4 over IgE antibodies do not improve prediction of peanut allergy nor of its severity compared to specific IgE alone. *Clin Exp Allergy*. 2019 Feb;49(2):216-226.
184. Santos AF, Du Toit G, O'Rourke C, Becares N, Couto-Francisco N, Radulovic S, et al. Biomarkers of severity and threshold of allergic reactions during oral peanut challenges. *J Allergy Clin Immunol*. 2020 Aug;146(2):344-355.
185. Turner PJ, Custovic A. Life-threatening anaphylaxis to peanut—impossible to predict?. *Journal of Allergy and Clinical Immunology*. 2022 Jan 6.
186. Datema MR, Lyons SA, Fernández-Rivas M, Ballmer-Weber B, Knulst AC, ... van Ree R. Estimating the Risk of Severe Peanut Allergy Using Clinical Background and IgE Sensitization Profiles. *Front. Allergy*, 07 June 2021.
187. Masthoff LJ, van Hoffen E, Mattsson L, Lidholm J, Andersson K, Zuidmeer-Jongejan L, et al. Peanut allergy is common among hazelnut-sensitized subjects but is not primarily the result of IgE cross-reactivity. *Allergy*. 2015;70(3):265-74.
188. Ballmer-Weber BK, Fernandez-Rivas M, Beyer K, Defernez M, Sperrin M, Mackie AR, Salt LJ, et al. How much is too much? Threshold dose distributions for 5 food allergens. *Journal of allergy and clinical immunology*. 2015 Apr 1;135(4):964-71.

189. Ballmer-Weber BK, Lidholm J, Lange L, Pascal M, Lang C, Gernert S, et al. Allergen Recognition Patterns in Walnut Allergy Are Age Dependent and Correlate with the Severity of Allergic Reactions. *J Allergy Clin Immunol Pract*. 2019;7(5):1560-1567.e6.
190. Pastorello EA, Farioli L, Pravettoni V, Scibilia J, Mascheri A, Borgonovo L, et al. Pru p 3-sensitized Italian peach-allergic patients are less likely to develop severe symptoms when also presenting IgE antibodies to Pru p 1 and Pru p 4. *Int Arch Allergy Immunol*. 2011;156(4):362-72.
191. Masthoff LJ, Mattsson L, Zuidmeer-Jongejan L, Lidholm J, Andersson K, Akkerdaas JH, et al. Sensitization to Cor a 9 and Cor a 14 is highly specific for a hazelnut allergy with objective symptoms in Dutch children and adults. *J Allergy Clin Immunol*. 2013 Aug;132(2):393-9.
192. Burrell S, Patel N, Vazquez-Ortiz M, Campbell DE, DunnGalvin A, Turner PJ. Self-administration of adrenaline for anaphylaxis during in-hospital food challenges improves health-related quality of life. *Archives of disease in childhood*. 2021 Jun 1;106(6):558-63.
